# Supplementary material for: Reactions of allyl alcohols and boronic acids with trifluoromethanesulfonyl hypervalent iodonium ylide under copper-catalysis
Source: Royal Society of Chemistry journal article supplement (doi:10.1039/c5dt02214b), 2015-01-01

Electronic Supplementary Information

**Reactions of allyl alcohols and boronic acids with  
trifluoromethanesulfonyl hypervalent iodonium ylide under  
copper-catalysis**

Sadayuki Arimori, Masahiro Takada and Norio Shibata\*

*Department of Frontier Materials, Nagoya Institute of Technology, Gokiso,  
Showa-ku, Nagoya 466-8555, Japan.*

*Tel: (+81) 52-735-7543, Fax: (+81) 52-735-5442*

*E-mail: nozshiba@nitech.ac.jp*

Table of Content

|                                                                                                                                                                                                                                               |              |
|-----------------------------------------------------------------------------------------------------------------------------------------------------------------------------------------------------------------------------------------------|--------------|
| 1. General information                                                                                                                                                                                                                        | ----- S2     |
| 2. Experimental details: General Procedure for synthesis of<br>trifluoromethylsulfinyl derivatives and trifluoromethylthiolation of boronic acids<br>with Trifluoromethanesulfonyl Hypervalent Iodonium Ylide ( $^+\text{SCF}_3$ reagent) -S3 |              |
| 3. Products Spectra data                                                                                                                                                                                                                      | ----- S4–S61 |

## 1. General information.

All reactions were performed in oven-dried glassware under a positive pressure of nitrogen. Solvents were transferred *via* syringe and were introduced into the reaction vessels through a rubber septum. All solvents were purified by standard method. All of the reactions were monitored by thin-layer chromatography (TLC) carried out on 0.25 mm Merck silica gel (60-F254). The TLC plates were visualized with UV light and 7% phosphomolybdic acid or  $\text{KMnO}_4$  in water/heat. All of the reaction products were purified by preparative thin-layer plates (PLC) carried out on 2.0 mm Merck silica gel (60-F254) or Column chromatography. Column chromatography was carried out on a column packed with silica gel 60N spherical neutral size 63-210  $\mu\text{m}$ . The  $^1\text{H}$  NMR (300 MHz) and  $^{19}\text{F}$  NMR (282 MHz) spectra (with Hexafluorobenzene ( $\delta$  ppm -162.2) as an internal standard) as for solution in  $\text{CDCl}_3$  were recorded on a Varian Mercury 300.  $^{13}\text{C}$  NMR spectra for solution in  $\text{CDCl}_3$  was recorded on a BRUKER 500 UltraShield<sup>TR</sup> (125.8 MHz). Chemical shifts ( $\delta$ ) are expressed in ppm downfield from internal TMS or  $\text{C}_6\text{F}_6$ . Chemical shifts ( $\delta$ ) are reported in ppm, and coupling constants ( $J$ ) are in Hertz (Hz). The following abbreviations were used to explain the multiplicities: s = singlet, d = doublet, t = triplet, q = quartet, m = multiplet, br = broad. Mass spectra were recorded on a SHIMADZU GCMS-QP5050A (EI-MS) and SHIMADZU LCMS-2010EV (ESI-MS and APCI-MS). Infrared spectra were recorded on JASCO FT/IR-200 or a JASCO FT/IR-4100 spectrometer.

### Preparation of the $^+\text{SCF}_3$ reagent 1

The  $^+\text{SCF}_3$  reagent 1<sup>1)</sup> was prepared according to the referential procedure.

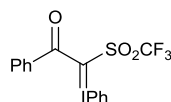

Reference: (1) Y. –D. Yang, A. Azuma, E. Tokunaga, M. Yamasaki, M. Shiro and N. Shibata, *J. Am. Chem. Soc.*, 2013, **135**, 8782.

## 2. Experimental details

### General procedure for synthesis of trifluoromethylsulfinyl derivatives.

A mixture of allyl alcohol **2a-n** (0.25 mmol),  $^+\text{SCF}_3$ -reagent **1** (0.50 mmol),  $\text{CuF}_2$  (0.05 mmol) and DMAc (1.25 ml) was stirred under  $\text{N}_2$  at room temperature for 24 h. Then,  $\text{H}_2\text{O}$  was added, and then extracted with AcOEt three times. The organic layer was washed with brine and dried over  $\text{MgSO}_4$ . Solvent was removed under reduced pressure and the crude product was purified by column chromatography on silica-gel to give the  $\text{S(O)CF}_3$ -product **3a-n**.

### General procedure for trifluoromethylthiolation of boronic acids.

To a mixture of boronic acid **4a-i** (0.25 mmol),  $^+\text{SCF}_3$ -reagent **1** (0.50 mmol) and DMAc (1.25 ml) under  $\text{N}_2$  was added  $\text{Cu(OAc)}_2$  (0.30 mmol). The reaction mixture was stirred at 80 °C for 10 h. After cooling at room temperature,  $\text{H}_2\text{O}$  was added, and then extracted with AcOEt three times. The organic layer was washed with brine and dried over  $\text{MgSO}_4$ . Solvent was removed under reduced pressure and the crude product was purified by column chromatography on silica-gel to give the  $\text{SCF}_3$ -product **5a-i**.

**Table 1S Optimization of trifluoromethylthiolation reaction of boronic acid 4a with 1.<sup>a</sup>**

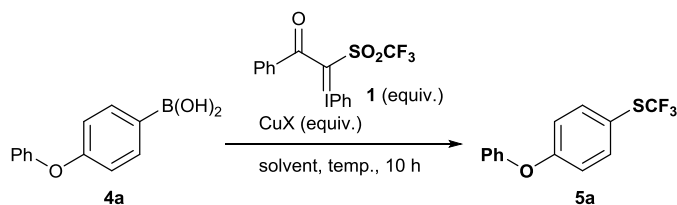

| run | <b>1</b> (equiv.) | CuX (equiv.)             | solvent | temp.<br>(°C) | yield<br>(%) <sup>b</sup> |
|-----|-------------------|--------------------------|---------|---------------|---------------------------|
| 1   | 2.0               | $\text{CuF}_2$ (0.2)     | DMAc    | rt            | 0                         |
| 2   | 2.0               | $\text{CuF}_2$ (1.2)     | DMAc    | 80            | 13                        |
| 3   | 1.0               | $\text{Cu(OAc)}_2$ (0.2) | DMAc    | 80            | 10                        |
| 4   | 1.0               | $\text{Cu(OAc)}_2$ (1.0) | DMAc    | 80            | 40                        |
| 5   | 2.0               | $\text{Cu(OAc)}_2$ (2.0) | DMAc    | 80            | <b>47</b>                 |

|                 |     |                                                             |      |     |    |
|-----------------|-----|-------------------------------------------------------------|------|-----|----|
| 6               | 2.0 | Cu(OAc) <sub>2</sub> (1.0)                                  | DMAc | 80  | 35 |
| 7               | 2.0 | Cu(OAc) <sub>2</sub> (1.2)                                  | DMAc | 80  | 47 |
| 8               | 2.0 | Cu(OAc) <sub>2</sub> (1.2)                                  | DMAc | 100 | 44 |
| 9               | 2.0 | Cu(OAc) <sub>2</sub> (1.2)                                  | DMAc | 50  | 5  |
| 10              | 2.0 | Cu(OAc) <sub>2</sub> (1.2)                                  | NMP  | 80  | 0  |
| 11 <sup>c</sup> | 2.0 | Cu(OAc) <sub>2</sub> (1.2)                                  | DMAc | 80  | 0  |
| 12              | 2.0 | Cu (1.2)                                                    | DMAc | 80  | 26 |
| 13              | 2.0 | Cu(OAc) (1.2)                                               | DMAc | 80  | 44 |
| 14              | 2.0 | CuTc <sup>d</sup> (1.2)                                     | DMAc | 80  | 39 |
| 15              | 2.0 | CuCl (1.2)                                                  | DMAc | 80  | 2  |
| 16              | 2.0 | CuCl <sub>2</sub> (1.2)                                     | DMAc | 80  | 0  |
| 17              | 2.0 | Cu(OTf) <sub>2</sub> (1.2)                                  | DMAc | 80  | 11 |
| 18              | 2.0 | Cu(OTFA) <sub>2</sub> <sup>e</sup> -xH <sub>2</sub> O (1.2) | DMAc | 80  | 1  |
| 19 <sup>f</sup> | 2.0 | Cu(OAc) <sub>2</sub> (1.2)                                  | DMAc | 80  | 0  |
| 20 <sup>g</sup> | 2.0 | Cu(OAc) <sub>2</sub> (1.2)                                  | DMAc | 80  | 0  |

<sup>a</sup>The reaction were carried out with **4a** (0.25 mmol), **1** and CuX in each solvent (1.25 ml). <sup>b</sup><sup>19</sup>F NMR yields with PhF (0.75 mmol) as an internal standard.

<sup>c</sup>1,10-phenanthroline (0.25 mmol) was added. <sup>d</sup>CuTc: Cu-thiophene-2-carboxylate. <sup>e</sup>Cu(OTFA)<sub>2</sub>: Cu-bis- trifluoroacetate. <sup>f</sup>AcONa (0.25 mmol) was added. <sup>g</sup>PhCO<sub>2</sub>Na (0.25 mmol) was added.

### 3. Products Spectra data

#### (E)-(3-((trifluoromethyl)sulfinyl)prop-1-en-1yl)benzene (3a)

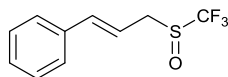

<sup>1</sup>H NMR (300 MHz, CDCl<sub>3</sub>): δ = 7.40-7.33 (m, 5H), 6.82 (d, *J* = 15.6 Hz, 1H), 6.27-6.16 (m, 1H), 3.93-3.89 (m, 2H). <sup>19</sup>F NMR (282 MHz, CDCl<sub>3</sub>): δ = -72.7 (s, 3F). HRMS (ESI<sup>+</sup>): *m/z* calcd. for [M+Na]<sup>+</sup>; 257.0224 found 257.0230. White solid (41.6 mg, 71%). The product was identified by comparison of the spectral data with the reported data. Reference: M. Maeno, N. Shibata and D. Cahard, *Org. Lett.*, 2015, **17**, 1990.

### 2-((*E*)-3-(trifluoromethylsulfinyl)prop-1-enyl)naphthalene (3b)

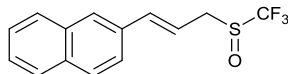

$^1\text{H}$  NMR (300 MHz,  $\text{CDCl}_3$ ):  $\delta$  = 7.83-7.78 (m, 4H), 7.60 (d,  $J$  = 8.4 Hz, 1H), 7.50-7.49 (m, 2H), 6.96 (d,  $J$  = 15.6 Hz, 1H), 6.38-6.28 (m, 1H), 3.96 (br s, 2H).  $^{19}\text{F}$  NMR (282 MHz,  $\text{CDCl}_3$ ):  $\delta$  = -72.6 (s, 3F). HRMS ( $\text{ESI}^+$ ):  $m/z$  calcd. for  $[\text{M}+\text{Na}]$ ; 307.0380 found 307.0358. White solid (44.1 mg, 62%). The product was identified by comparison of the spectral data with the reported data. Reference: M. Maeno, N. Shibata and D. Cahard, *Org. Lett.*, 2015, **17**, 1990.

### (*E*)-1-(*tert*-butyl)-4-(3-((trifluoromethyl)sulfinyl)prop-1-en-1-yl)benzene (3c)

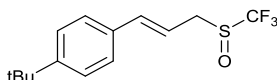

$^1\text{H}$  NMR (300 MHz,  $\text{CDCl}_3$ ):  $\delta$  = 7.36 (br s, 4H), 6.79 (d,  $J$  = 15.6 Hz, 1H), 6.22-6.12 (m, 1H), 3.91 (d,  $J$  = 3.9 Hz, 2H), 1.32 (s, 9H).  $^{19}\text{F}$  NMR (282 MHz,  $\text{CDCl}_3$ ):  $\delta$  = -72.7 (s, 3F).  $^{13}\text{C}$  NMR (150.9 MHz,  $\text{CDCl}_3$ ):  $\delta$  = 152.1, 140.2, 132.7, 126.1 (q,  $J$  = 338.0 Hz), 126.5, 125.7, 112.4, 53.5 (d,  $J$  = 3.0 Hz), 34.7, 31.2. HRMS ( $\text{ESI}^+$ ):  $m/z$  calcd. for  $[\text{M}+\text{Na}]$ ; 313.0850 found 313.0847. ATR-FTIR:  $\nu$  = 3458, 2962, 2904, 2866, 1750, 1515, 1476, 1462, 1400, 1367, 1283, 1267, 1181, 1139, 1073, 968, 821, 570  $\text{cm}^{-1}$ . mp: 42.5 °C. White solid (61.7 mg, 85%)

### 1-methyl-4-((*E*)-3-(trifluoromethylsulfinyl)prop-1-enyl)benzene (3d)

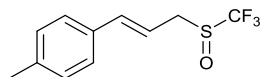

$^1\text{H}$  NMR (300 MHz,  $\text{CDCl}_3$ ):  $\delta$  = 7.30 (d,  $J$  = 7.8 Hz, 2H), 7.15 (d,  $J$  = 7.8 Hz, 2H), 6.76 (d,  $J$  = 16.2 Hz, 1H), 6.15 (dt,  $J$  = 15.9 Hz, 8.1 Hz, 1H), 3.86 (m, 2H), 2.32 (s, 3H).  $^{19}\text{F}$  NMR (282 MHz,  $\text{CDCl}_3$ ):  $\delta$  = -72.7 (s, 3F). HRMS ( $\text{ESI}^+$ ):  $m/z$  calcd. for  $[\text{M}+\text{Na}]$ ; 271.0380 found 271.0377. White solid (37.9 mg, 61%). The product was identified by comparison of the spectral data with the reported data. Reference: M. Maeno, N. Shibata and D. Cahard, *Org. Lett.*, 2015, **17**, 1990.

### 1-methoxy-4-((*E*)-3-(trifluoromethylsulfinyl)prop-1-enyl)benzene (3e)

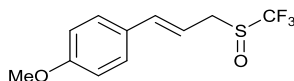

$^1\text{H}$  NMR (300 MHz,  $\text{CDCl}_3$ ):  $\delta$  = 7.34 (d,  $J$  = 7.8 Hz, 2H), 6.87 (d,  $J$  = 7.8 Hz, 2H), 6.74 (d,  $J$  = 15.6 Hz, 1H), 6.05 (dt,  $J$  = 15.4, 7.6 Hz, 1H), 3.89 (br s, 2H), 3.82 (s, 3H).  $^{19}\text{F}$  NMR (282 MHz,  $\text{CDCl}_3$ ):  $\delta$  = -72.7 (s, 3F). HRMS ( $\text{ESI}^+$ ):  $m/z$  calcd. for  $[\text{M}+\text{Na}]$ ; 287.0330 found 287.0333. White solid (29.7 mg, 45%). The product was identified by comparison of the spectral data with the reported data. Reference: M. Maeno, N. Shibata and D. Cahard, *Org. Lett.*, 2015, **17**, 1990.

### 1-methoxy-3-((*E*)-3-(trifluoromethylsulfinyl)prop-1-enyl)benzene (3f)

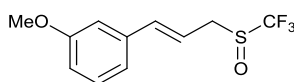

$^1\text{H}$  NMR (300 MHz,  $\text{CDCl}_3$ ):  $\delta$  = 7.29-7.26 (m, 1H), 7.00 (d,  $J$  = 7.2 Hz, 1H), 6.93 (s, 1H), 6.86 (d,  $J$  = 7.5 Hz, 1H), 6.77 (d,  $J$  = 15.6 Hz, 1H), 6.20 (dt,  $J$  = 15.9, 7.8 Hz, 1H), 3.91-3.89 (m, 2H), 3.83 (s, 3H).  $^{19}\text{F}$  NMR (282 MHz,  $\text{CDCl}_3$ ):  $\delta$  = -72.7 (s, 3F). HRMS ( $\text{ESI}^+$ ):  $m/z$  calcd. for  $[\text{M}+\text{Na}]$ ; 287.0330 found 287.0316. White solid (33.0 mg, 50%). The product was identified by comparison of the spectral data with the reported data. Reference: M. Maeno, N. Shibata and D. Cahard, *Org. Lett.*, 2015, **17**, 1990.

### (*E*)-1-methoxy-2-(3-((trifluoromethyl)sulfinyl)prop-1-en-1-yl)benzene (3g)

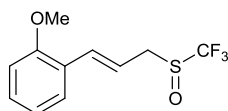

$^1\text{H}$  NMR (300 MHz,  $\text{CDCl}_3$ ):  $\delta$  = 7.42 (d,  $J$  = 7.2 Hz, 1H), 7.30-7.28 (m, 1H), 7.11 (d,  $J$  = 15.6 Hz, 1H), 6.96-6.90 (m, 2H), 6.26 (dt,  $J$  = 15.6 Hz, 7.5 Hz, 1H), 3.93-3.92 (m, 2H), 3.86 (s, 3H).  $^{19}\text{F}$  NMR (282 MHz,  $\text{CDCl}_3$ ):  $\delta$  = -72.7 (s, 3F). HRMS ( $\text{ESI}^+$ ):  $m/z$  calcd. for  $[\text{M}+\text{Na}]$ ; 287.0330 found 287.0332. White solid (39.7 mg, 60%). The product was identified by comparison of the spectral data with the reported data. Reference: M. Maeno, N. Shibata and D. Cahard, *Org. Lett.*, 2015, **17**, 1990.

### 1-Chloro-4-((*E*)-3-(trifluoromethylsulfinyl)prop-1-enyl)benzene (3h)

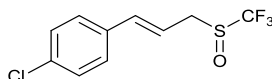

$^1\text{H}$  NMR (300 MHz,  $\text{CDCl}_3$ ):  $\delta$  = 7.28 (br s, 4H), 6.72 (d,  $J$  = 15.9 Hz, 1H), 6.15 (dt,  $J$  = 15.3, 7.5 Hz, 1H), 3.85 (s, 2H).  $^{19}\text{F}$  NMR (282 MHz,  $\text{CDCl}_3$ ):  $\delta$  = -72.6 (s, 3F). HRMS (ESI $^-$ ):  $m/z$  calcd. for  $[\text{M}-\text{H}]$ ; 266.9858 found 266.9864. White solid (50.4 mg, 75%). The product was identified by comparison of the spectral data with the reported data. Reference: M. Maeno, N. Shibata and D. Cahard, *Org. Lett.*, 2015, **17**, 1990.

**1-(Trifluoromethyl)-4-((*E*)-3-(trifluoromethylsulfinyl)prop-1-enyl)benzene (3i)**

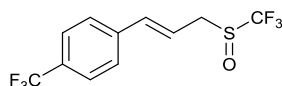

$^1\text{H}$  NMR (300 MHz,  $\text{CDCl}_3$ ):  $\delta$  = 7.60 (d,  $J$  = 6.9 Hz, 2H), 7.50 (d,  $J$  = 6.9 Hz, 2H), 6.84 (d,  $J$  = 15.9 Hz, 1H), 6.35-6.30 (m, 1H), 3.92 (br s, 2H).  $^{19}\text{F}$  NMR (282 MHz,  $\text{CDCl}_3$ ):  $\delta$  = -63.2 (s, 3F), -72.5 (s, 3F). HRMS (ESI $^-$ ):  $m/z$  calcd. for  $[\text{M}-\text{H}]$ ; 301.0122 found 301.0124. White solid (33.3 mg, 44%). The product was identified by comparison of the spectral data with the reported data. Reference: M. Maeno, N. Shibata and D. Cahard, *Org. Lett.*, 2015, **17**, 1990.

**2-((*E*)-3-(trifluoromethylsulfinyl)prop-1-enyl)thiophene (3j)**

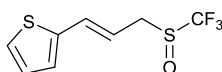

$^1\text{H}$  NMR (300 MHz,  $\text{CDCl}_3$ ):  $\delta$  = 7.06-7.00 (m, 3H), 6.93 (d,  $J$  = 15.9 Hz, 1H), 6.08-6.00 (m, 1H), 3.88 (d,  $J$  = 6.0 Hz, 2H).  $^{19}\text{F}$  NMR (282 MHz,  $\text{CDCl}_3$ ):  $\delta$  = -72.7 (s, 3F). HRMS (ESI $^-$ ):  $m/z$  calcd. for  $[\text{M}-\text{H}]$ ; 262.9788 found 262.9789. White solid (18.0 mg, 30%). The product was identified by comparison of the spectral data with the reported data. Reference: M. Maeno, N. Shibata and D. Cahard, *Org. Lett.*, 2015, **17**, 1990.

**3-((*E*)-3-(trifluoromethylsulfinyl)prop-1-enyl)furan (3k)**

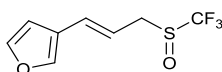

<sup>1</sup>H NMR (300 MHz, CDCl<sub>3</sub>): δ = 7.48 (s, 1H), 7.39 (s, 1H), 6.68 (d, *J* = 15.9 Hz, 1H), 6.54 (s, 1H), 5.92 (dt, *J* = 15.9 Hz, 7.5 Hz, 1H), 3.86-3.84 (m, 2H). <sup>19</sup>F NMR (282 MHz, CDCl<sub>3</sub>): δ = -72.7 (s, 3F). <sup>13</sup>C NMR (150.9 MHz, CDCl<sub>3</sub>): δ = 144.0, 141.7, 130.2, 125.3 (q, *J* = 402.9 Hz), 123.0, 112.8, 107.2, 53.3 (q, *J* = 4.5 Hz). HRMS (ESI<sup>-</sup>): *m/z* calcd. for [M-H]; 247.0017 found 247.0021. ATR-FTIR: ν = 3140, 2924, 2320, 1746, 1654, 1511, 1402, 1367, 1189, 1139, 1023, 964, 872, 791, 736, 601 cm<sup>-1</sup>. Brown oil (39.2 mg, 70%).

### 1-((*E*)-5-(trifluoromethylsulfinyl)pent-3-enyl)benzene (3l)

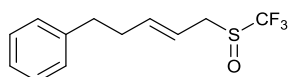

<sup>1</sup>H NMR (300 MHz, CDCl<sub>3</sub>): δ = 7.29-7.27 (m, 2H), 7.21-7.16 (m, 3H), 6.01-5.96 (m, 1H), 5.54-5.49 (m, 1H), 3.67 (br s, 2H), 2.76-2.71 (m, 2H), 2.47-2.45 (m, 2H). <sup>19</sup>F NMR (282 MHz, CDCl<sub>3</sub>): δ = -72.8 (s, 3F), -73.2 (s, 3F), 88% of *E* isomer, 12% of *Z* isomer. HRMS (ESI<sup>-</sup>): *m/z* calcd. for [M+Na]; 285.0537 found 285.0537. Colorless oil (27.5 mg, 42%). The product was identified by comparison of the spectral data with the reported data. Reference: M. Maeno, N. Shibata and D. Cahard, *Org. Lett.*, 2015, **17**, 1990.

### 1-((*E*)-3-(trifluoromethylsulfinyl)but-1-enyl)benzene (3m)

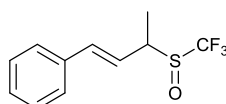

<sup>1</sup>H NMR (300 MHz, CDCl<sub>3</sub>): δ = 7.49-7.32 (m, 5H), 6.73 (d, *J* = 15.9 Hz, 1H), 6.26-6.21 (m, 0.4H), 6.12 (dd, 0.6H, *J* = 15.6, 8.7 Hz), 4.07-3.96 (1H, m), 1.66 (s, 1H), 1.64 (s, 2H). <sup>19</sup>F NMR (282 MHz, CDCl<sub>3</sub>): δ = -68.6 (s, 3F), -68.8 (s, 3F, main diastereomer), d.r. = 3/2. HRMS (ESI<sup>+</sup>): *m/z* calcd. for [M-SOCF<sub>3</sub>]; 131.0861 found 131.0880. Colorless oil (21.7 mg, 35%). The product was identified by comparison of the spectral data with the reported data. Reference: M. Maeno, N. Shibata and D. Cahard, *Org. Lett.*, 2015, **17**, 1990.

### 1-((*E*)-2-methyl-3-(trifluoromethylsulfinyl)prop-1-enyl)benzene (3n)



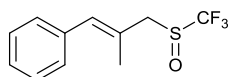

$^1\text{H}$  NMR (300 MHz,  $\text{CDCl}_3$ ):  $\delta$  = 7.35 (d,  $J$  = 6.0 Hz, 2H), 7.30-7.27 (m, 3H), 6.68 (s, 1H), 3.82 (dd,  $J$  = 33.0, 12.3 Hz, 2H), 2.08 (s, 3H).  $^{19}\text{F}$  NMR (282 MHz,  $\text{CDCl}_3$ ):  $\delta$  = -73.4 (s, 3F). HRMS (ESI $^+$ ):  $m/z$  calcd. for  $[\text{M}+\text{Na}]$ ; 271.0380 found 271.0377. White solid (9.3 mg, 15%). The product was identified by comparison of the spectral data with the reported data. Reference: M. Maeno, N. Shibata and D. Cahard, *Org. Lett.*, 2015, **17**, 1990.

#### 4-Phenoxy-1-(trifluoromethylthio)benzene (5a)

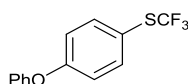

$^1\text{H}$  NMR (300 MHz,  $\text{CDCl}_3$ ):  $\delta$  = 7.59 (d,  $J$  = 7.2 Hz, 2H), 7.39 (t,  $J$  = 7.2 Hz, 2H), 7.19 (t,  $J$  = 6.6 Hz, 1H), 7.08-6.98 (m, 4H).  $^{19}\text{F}$  NMR (282 MHz,  $\text{CDCl}_3$ ):  $\delta$  = -44.0 (s, 3F). GC-MS (EI): 270  $[\text{M}^+]$ . Colorless oil (30.4 mg, 45%). The product was identified by comparison of the spectral data with the reported data. Reference: C. Chen, Y. Xie, L. Chu, R. -W. Wang, X. Zhang and F. -L. Quing, *Angew. Chem. Int. Ed.*, 2012, **51**, 2492.

#### 4-(Trifluoromethylthio)biphenyl (5b)

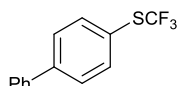

$^1\text{H}$  NMR (300 MHz,  $\text{CDCl}_3$ ):  $\delta$  = 7.72 (d,  $J$  = 6.9 Hz, 2H), 7.64-7.58 (m, 4H), 7.47-7.40 (m, 3H).  $^{19}\text{F}$  NMR (282 MHz,  $\text{CDCl}_3$ ):  $\delta$  = -43.2 (s, 3F). GC-MS (EI): 254  $[\text{M}^+]$ . White solid (15.9 mg, 25%). The product was identified by comparison of the spectral data with the reported data. Reference: Z. Wenig, W. He, C. Chen, R. Lee, D. Tan, Z. Lai, D. Kong, Y. Yuan and K. -W. Huang, *Angew. Chem. Int. Ed.*, 2013, **52**, 1548.

#### 1-(Trifluoromethylthio)naphthalene (5c)

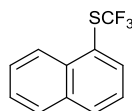

$^1\text{H}$  NMR (300 MHz,  $\text{CDCl}_3$ ):  $\delta$  = 8.54 (d,  $J$  = 8.4 Hz, 1H), 8.03-7.86 (m, 3H), 7.66-7.49 (m, 3H).  $^{19}\text{F}$  NMR (282 MHz,  $\text{CDCl}_3$ ):  $\delta$  = -42.7 (s, 3F). GC-MS (EI): 228 [M<sup>+</sup>]. Colorless oil (16.6 mg, 29%). The product was identified by comparison of the spectral data with the reported data. Reference: Z. Wenig, W. He, C. Chen, R. Lee, D. Tan, Z. Lai, D. Kong, Y. Yuan and K. -W. Huang, *Angew. Chem. Int. Ed.*, 2013, **52**, 1548.

**(6-Methoxynaphthalene-2-yl)(trifluoromethyl)sulfane (5d)**

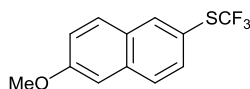

$^1\text{H}$  NMR (300 MHz,  $\text{CDCl}_3$ ):  $\delta$  = 8.11 (s, 1H), 7.78-7.75 (m, 2H), 7.62 (d,  $J$  = 8.5 Hz, 1H), 7.21 (dd,  $J$  = 8.5 Hz, 2.3 Hz, 1H), 7.15-7.14 (m, 1H), 3.93 (s, 3H).  $^{19}\text{F}$  NMR (282 MHz,  $\text{CDCl}_3$ ):  $\delta$  = -43.4 (s, 3F). GC-MS (EI): 258 [M<sup>+</sup>]. Colorless oil (23.9 mg, 38%). The product was identified by comparison of the spectral data with the reported data. Reference: X. Shao, X. Wang, T. Yang, L. Lu and Q. Shen, *Angew. Chem. Int. Ed.*, 2013, **52**, 3457.

**4-Nitro-1-(trifluoromethylthio)benzene (5e)**

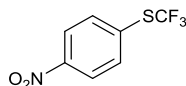

$^1\text{H}$  NMR (300 MHz,  $\text{CDCl}_3$ ):  $\delta$  = 8.28 (d,  $J$  = 7.9 Hz, 2H), 7.83 (d,  $J$  = 7.9 Hz, 2H).  $^{19}\text{F}$  NMR (282 MHz,  $\text{CDCl}_3$ ):  $\delta$  = -41.8 (s, 3F). GC-MS (EI): 223 [M<sup>+</sup>]. Colorless oil (15.1 mg, 27%). The product was identified by comparison of the spectral data with the reported data. Reference: Z. Wenig, W. He, C. Chen, R. Lee, D. Tan, Z. Lai, D. Kong, Y. Yuan and K. -W. Huang, *Angew. Chem. Int. Ed.*, 2013, **52**, 1548.

**2-(Trifluoromethylthio)benzo[b]thiophene (5f)**

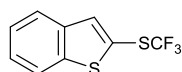

$^1\text{H}$  NMR (300 MHz,  $\text{CDCl}_3$ ):  $\delta$  = 7.82 (br s, 2H), 7.68 (s, 1H), 7.41 (br s, 2H).  $^{19}\text{F}$  NMR (282 MHz,  $\text{CDCl}_3$ ):  $\delta$  = -44.3 (s, 3F). GC-MS (EI): 234 [M<sup>+</sup>]. Colorless oil (7.1 mg, 12%). The product was identified by comparison of the spectral data

with the reported data. Reference: S. Alazet, L. Zimmer and T. Billard, *J. Fluorine Chem.*, 2015, **171**, 78.

### 3-(Trifluoromethylthio)benzo[*b*]furan (5g)

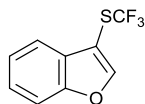

$^1\text{H}$  NMR (300 MHz,  $\text{CDCl}_3$ ):  $\delta$  = 7.93 (s, 1H), 7.72 (br s, 1H), 7.57-7.55 (m, 1H), 7.40-7.38 (m, 2H).  $^{19}\text{F}$  NMR (282 MHz,  $\text{CDCl}_3$ ):  $\delta$  = -43.6 (s, 3F). GC-MS (EI): 218 [M $^+$ ]. Colorless oil (8.1 mg, 15%). The product was identified by comparison of the spectral data with the reported data. Reference: G. Teverovskiy, D. S. Surry and S. L. Buchwald, *Angew. Chem. Int. Ed.*, 2011, **50**, 7312.

### (*E*)-(4-phenylstyryl)(trifluoromethyl)sulfane (5h)

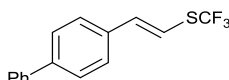

$^1\text{H}$  NMR (300 MHz,  $\text{CDCl}_3$ ):  $\delta$  = 7.61-7.56 (m, 4H), 7.48-7.34 (m, 5H), 7.04 (d,  $J$  = 15.3 Hz, 1H), 6.77 (d,  $J$  = 15.3 Hz, 1H).  $^{19}\text{F}$  NMR (282 MHz,  $\text{CDCl}_3$ ):  $\delta$  = -43.2 (s, 3F). GC-MS (EI): 280 [M $^+$ ]. White solid (31.5 mg, 45%). The product was identified by comparison of the spectral data with the reported data. Reference: M. Rueping, N. Tolstoluzhsky and P. Nikolaienko, *Chem. Eur. J.*, 2013, **19**, 14043.

### (*E*)-(4-methoxystyryl)(trifluoromethyl)sulfane (5i)

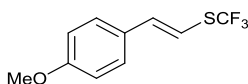

$^1\text{H}$  NMR (300 MHz,  $\text{CDCl}_3$ ):  $\delta$  = 7.35 (d,  $J$  = 6.6 Hz, 2H), 6.98 (d,  $J$  = 14.7 Hz, 1H), 6.88 (d,  $J$  = 6.6 Hz, 2H), 6.57 (d,  $J$  = 14.7 Hz, 1H), 3.83 (s, 3H).  $^{19}\text{F}$  NMR (282 MHz,  $\text{CDCl}_3$ ):  $\delta$  = -43.6 (s, 3F). GC-MS (EI): 234 [M $^+$ ]. Colorless oil (32.2 mg, 55%). The product was identified by comparison of the spectral data with the reported data. Reference: X. Shao, X. Wang, T. Yang, L. Lu and Q. Shen, *Angew. Chem. Int. Ed.*, 2013, **52**, 3457.

Copies of  $^{19}\text{F}$  NMR and  $^1\text{H}$  NMR

(*E*)-(3-((trifluoromethyl)sulfinyl)prop-1-en-1-yl)benzene (3a)

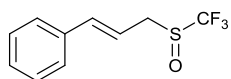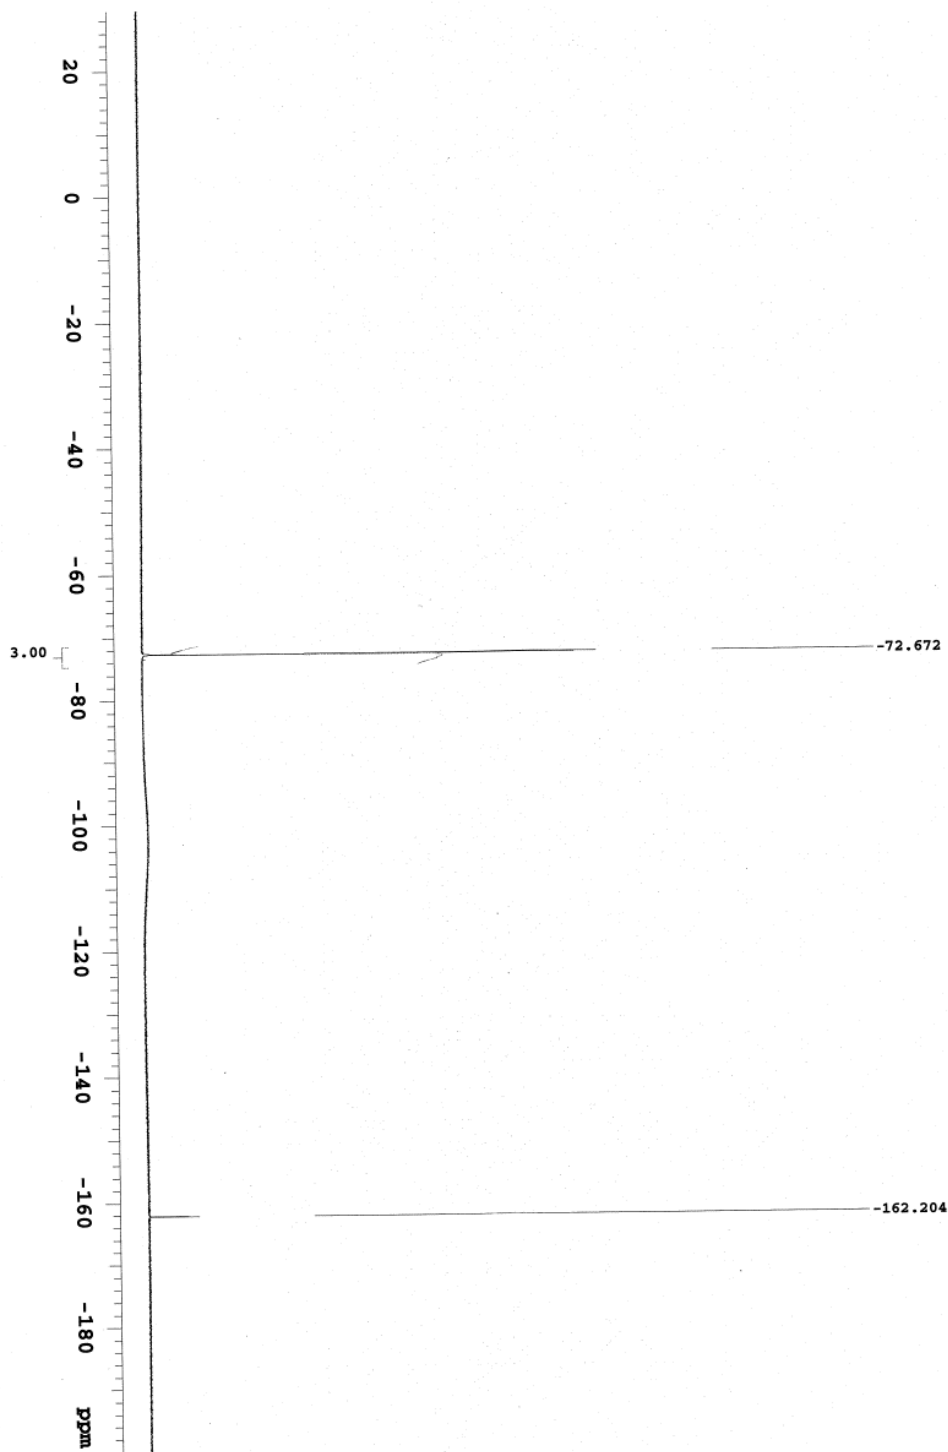

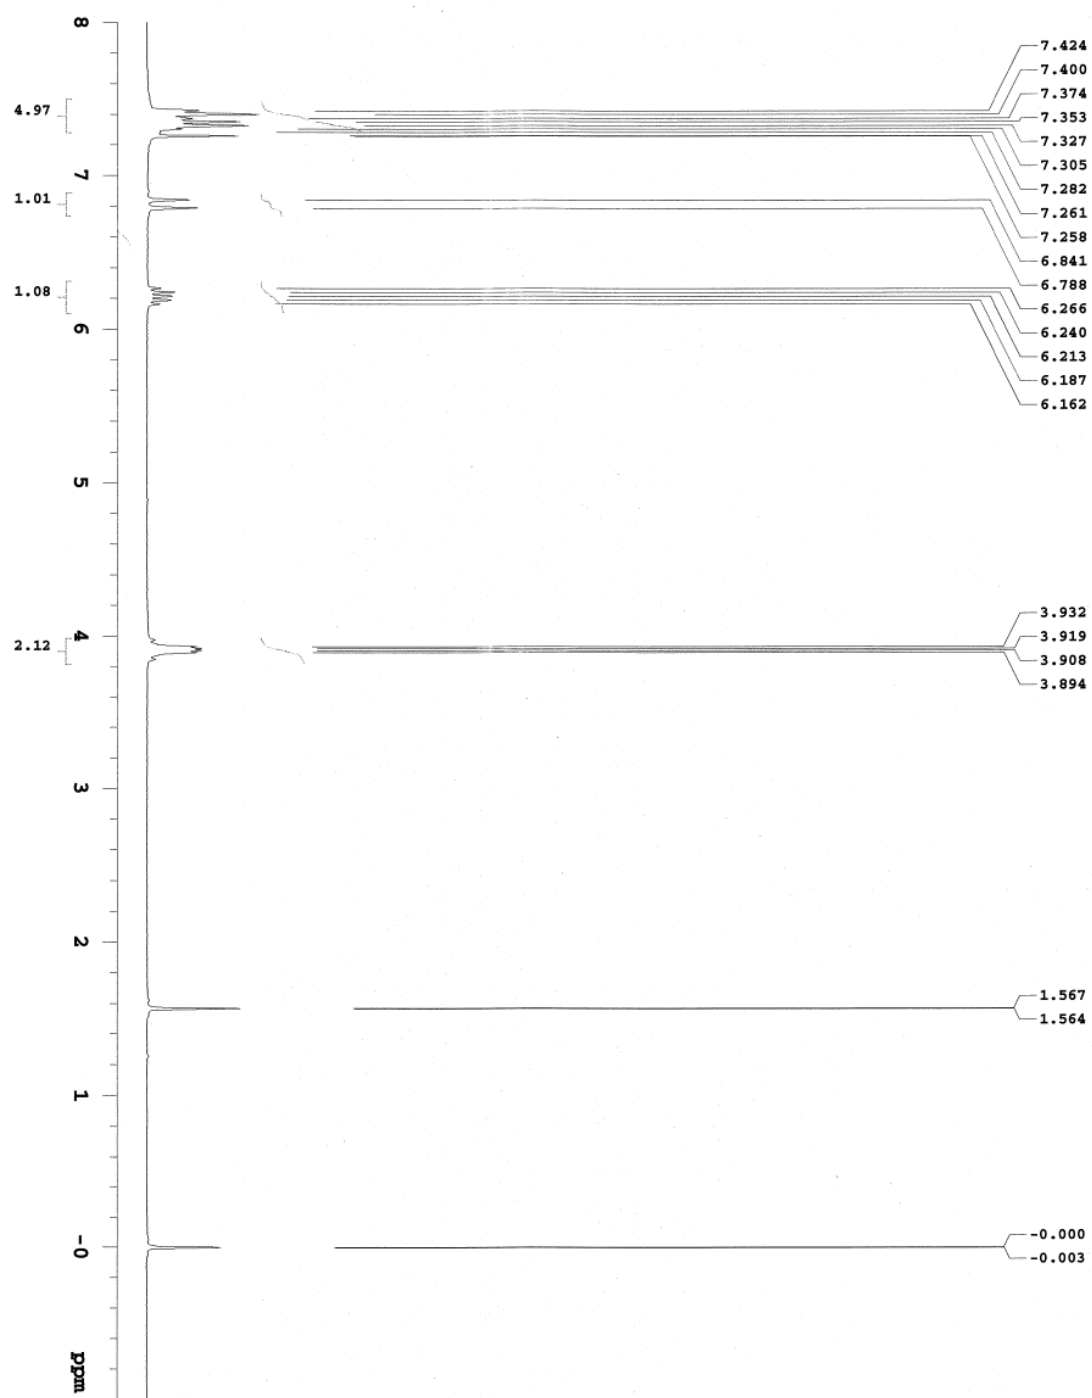

Copies of  $^{19}\text{F}$  NMR and  $^1\text{H}$  NMR

2-((*E*)-3-(trifluoromethylsulfinyl)prop-1-enyl)naphthalene (3b)

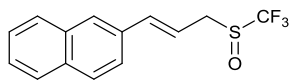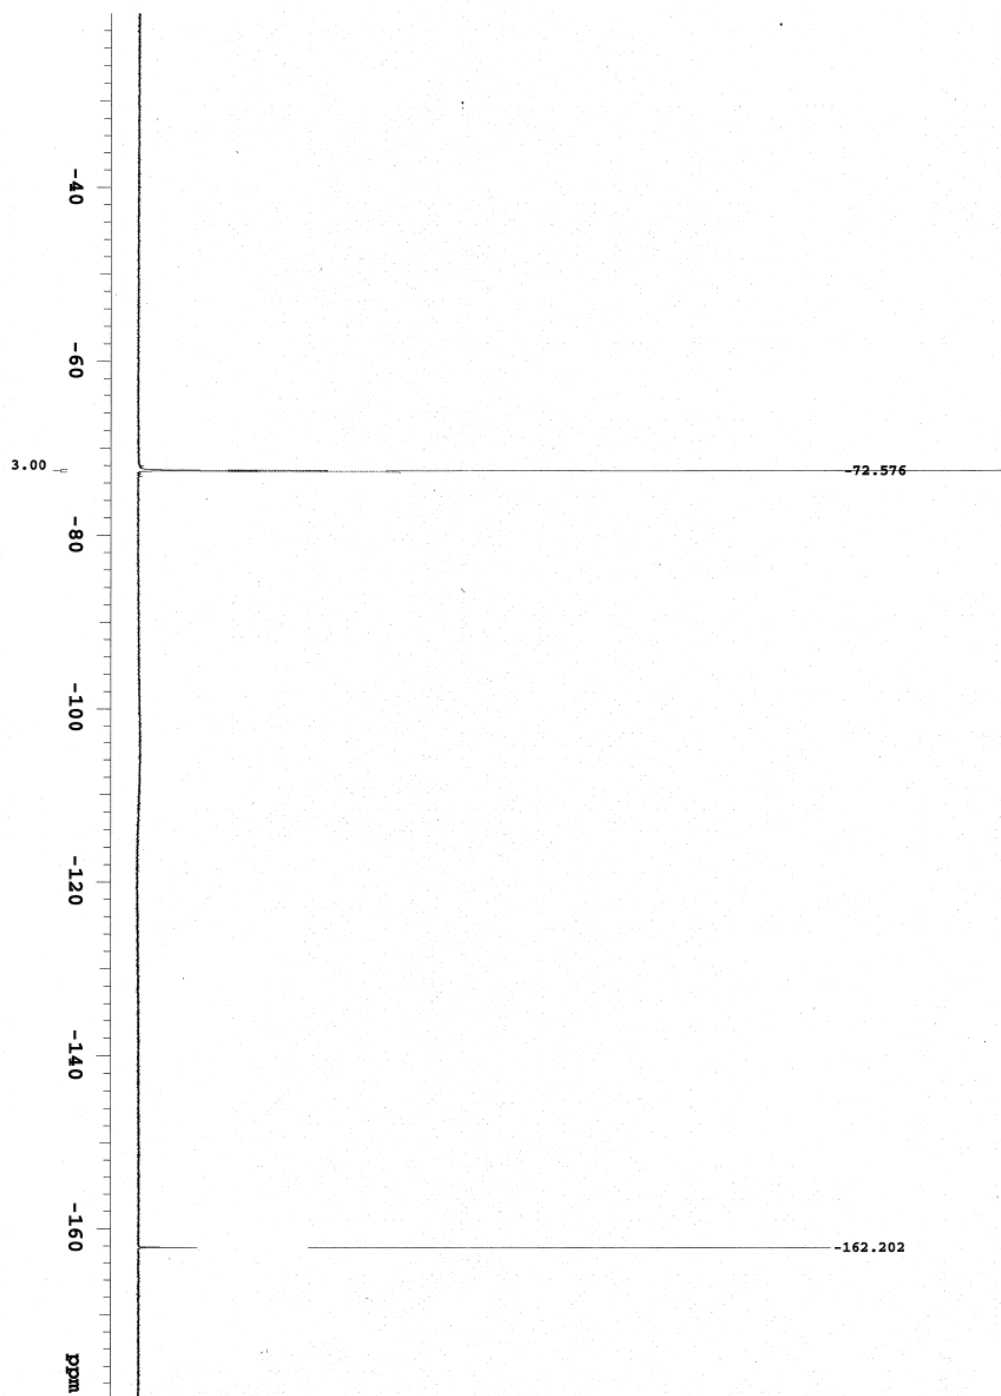

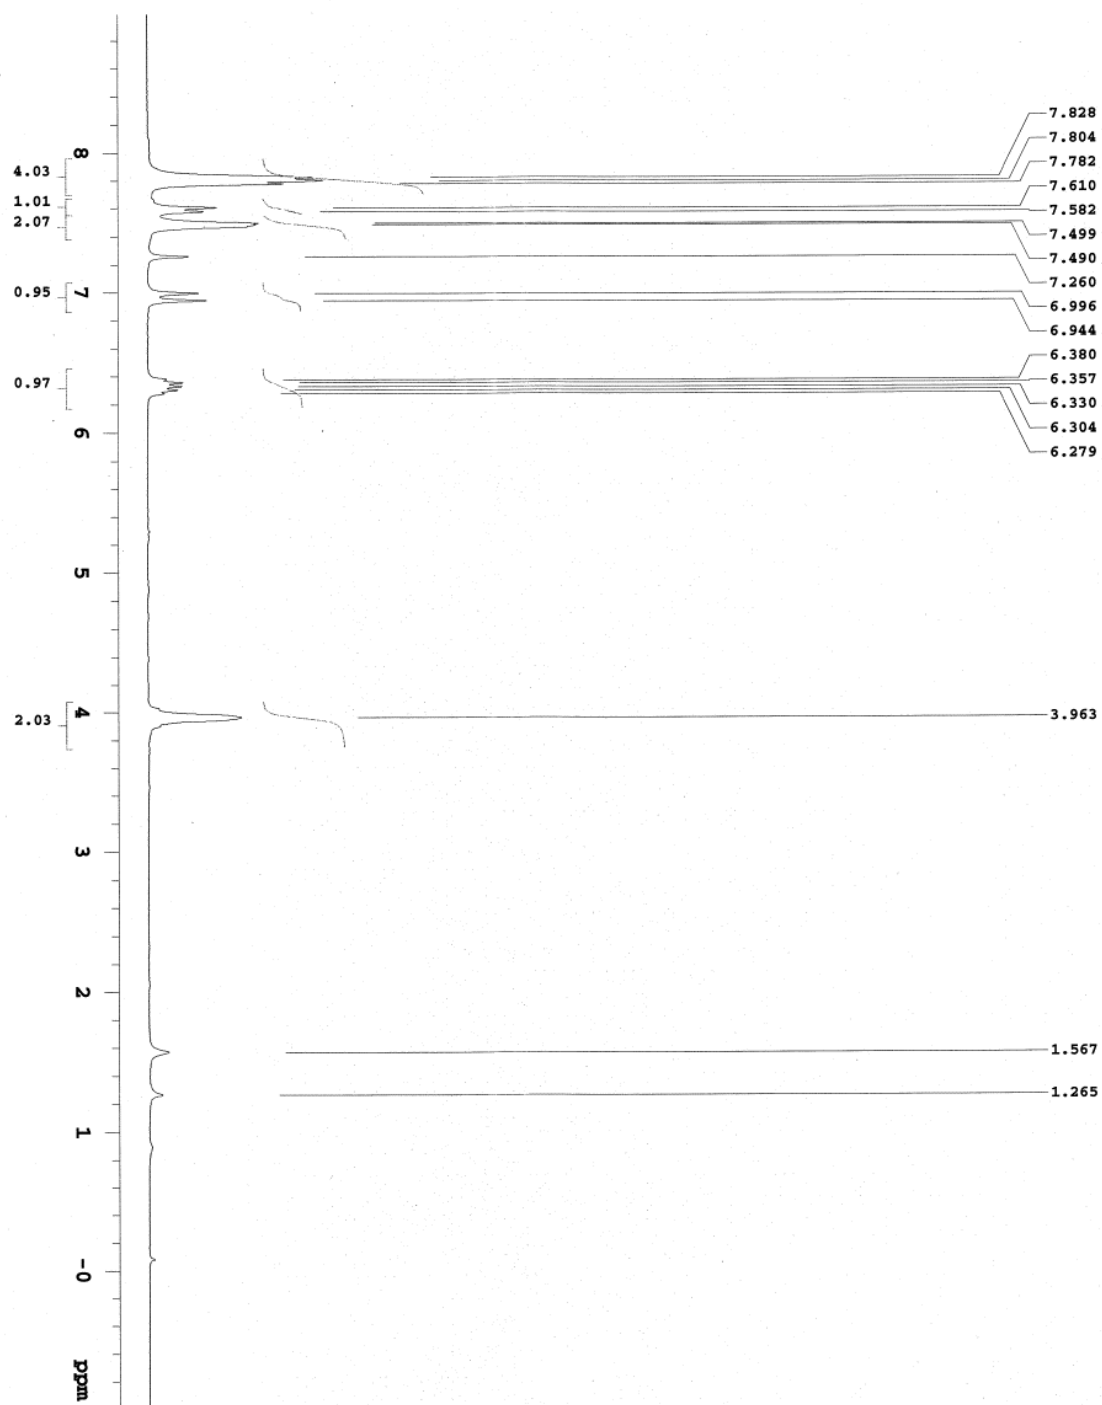

Copies of  $^{19}\text{F}$  NMR,  $^1\text{H}$  NMR and  $^{13}\text{C}$  NMR

(*E*)-1-(*tert*-butyl)-4-(3-((trifluoromethyl)sulfinyl)prop-1-en-1-yl)benzene (3c)

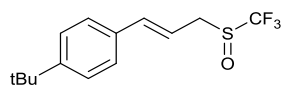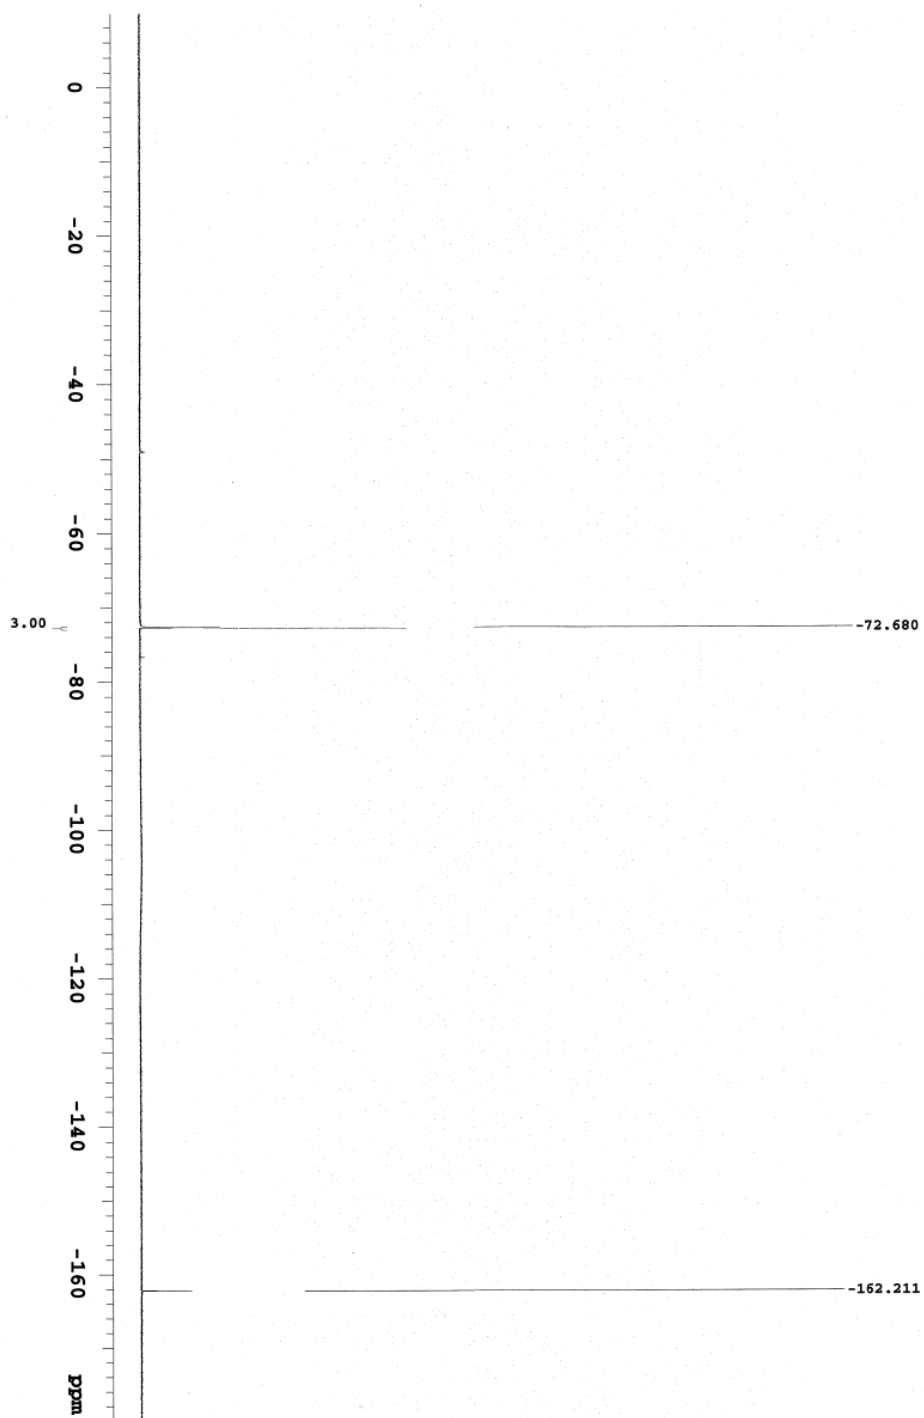



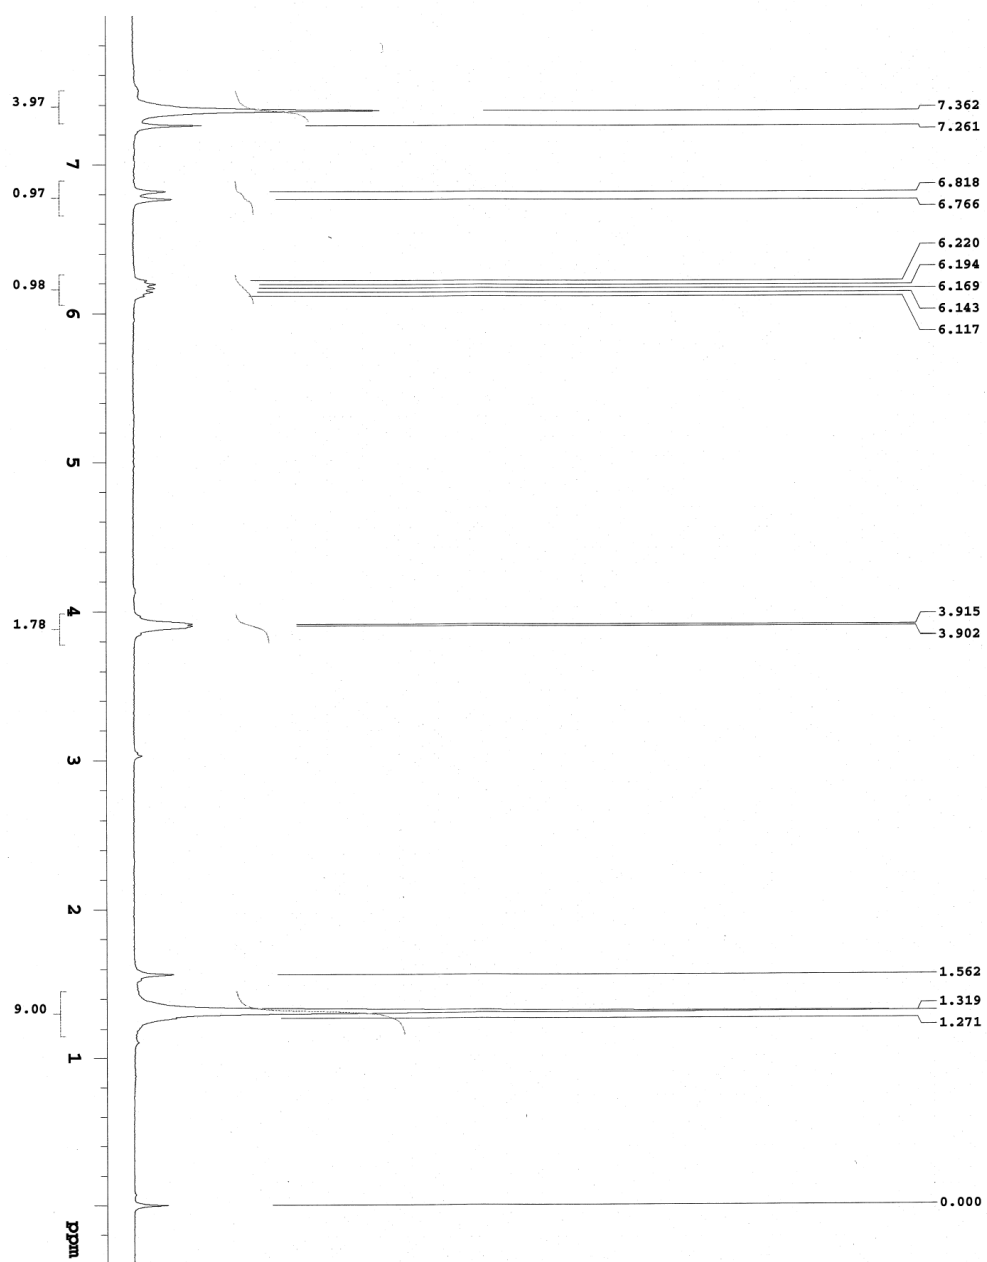

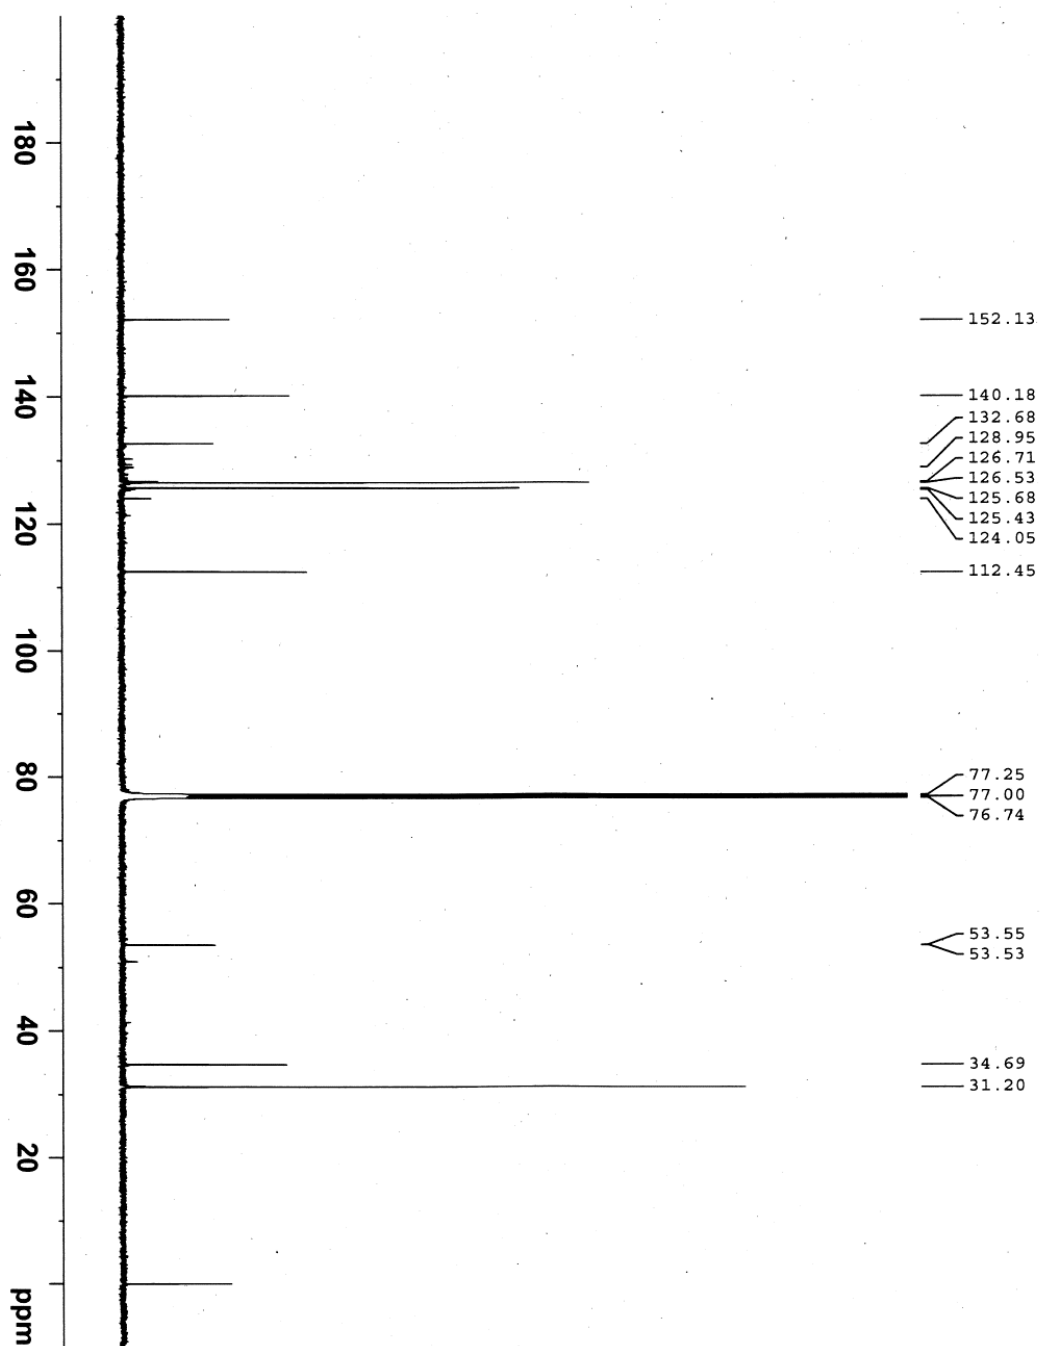

Copies of  $^{19}\text{F}$  NMR and  $^1\text{H}$  NMR

1-methyl-4-((*E*)-3-(trifluoromethylsulfinyl)prop-1-enyl)benzene (3d)

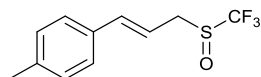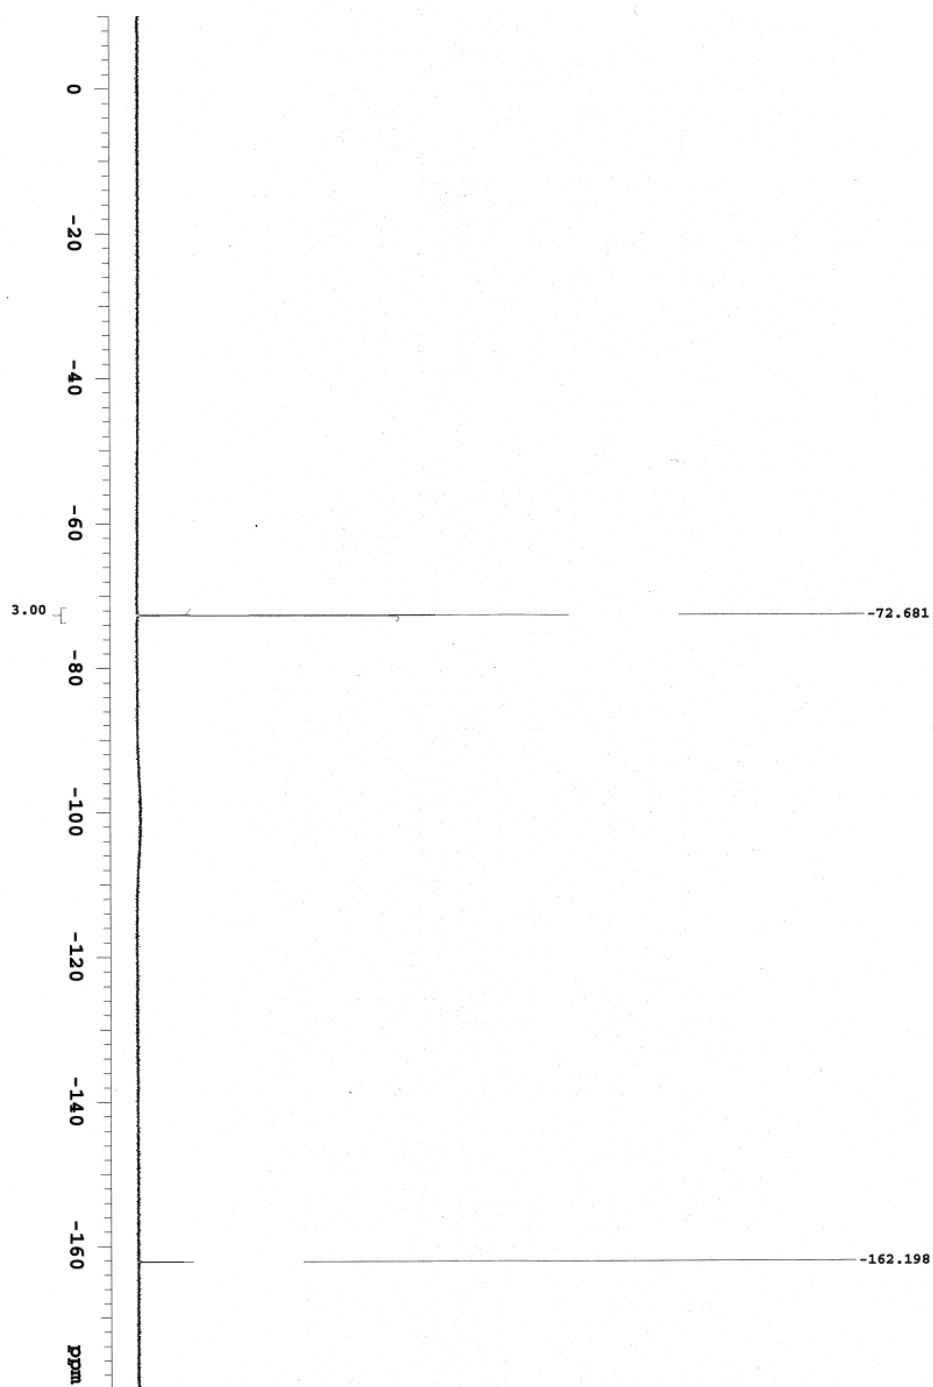

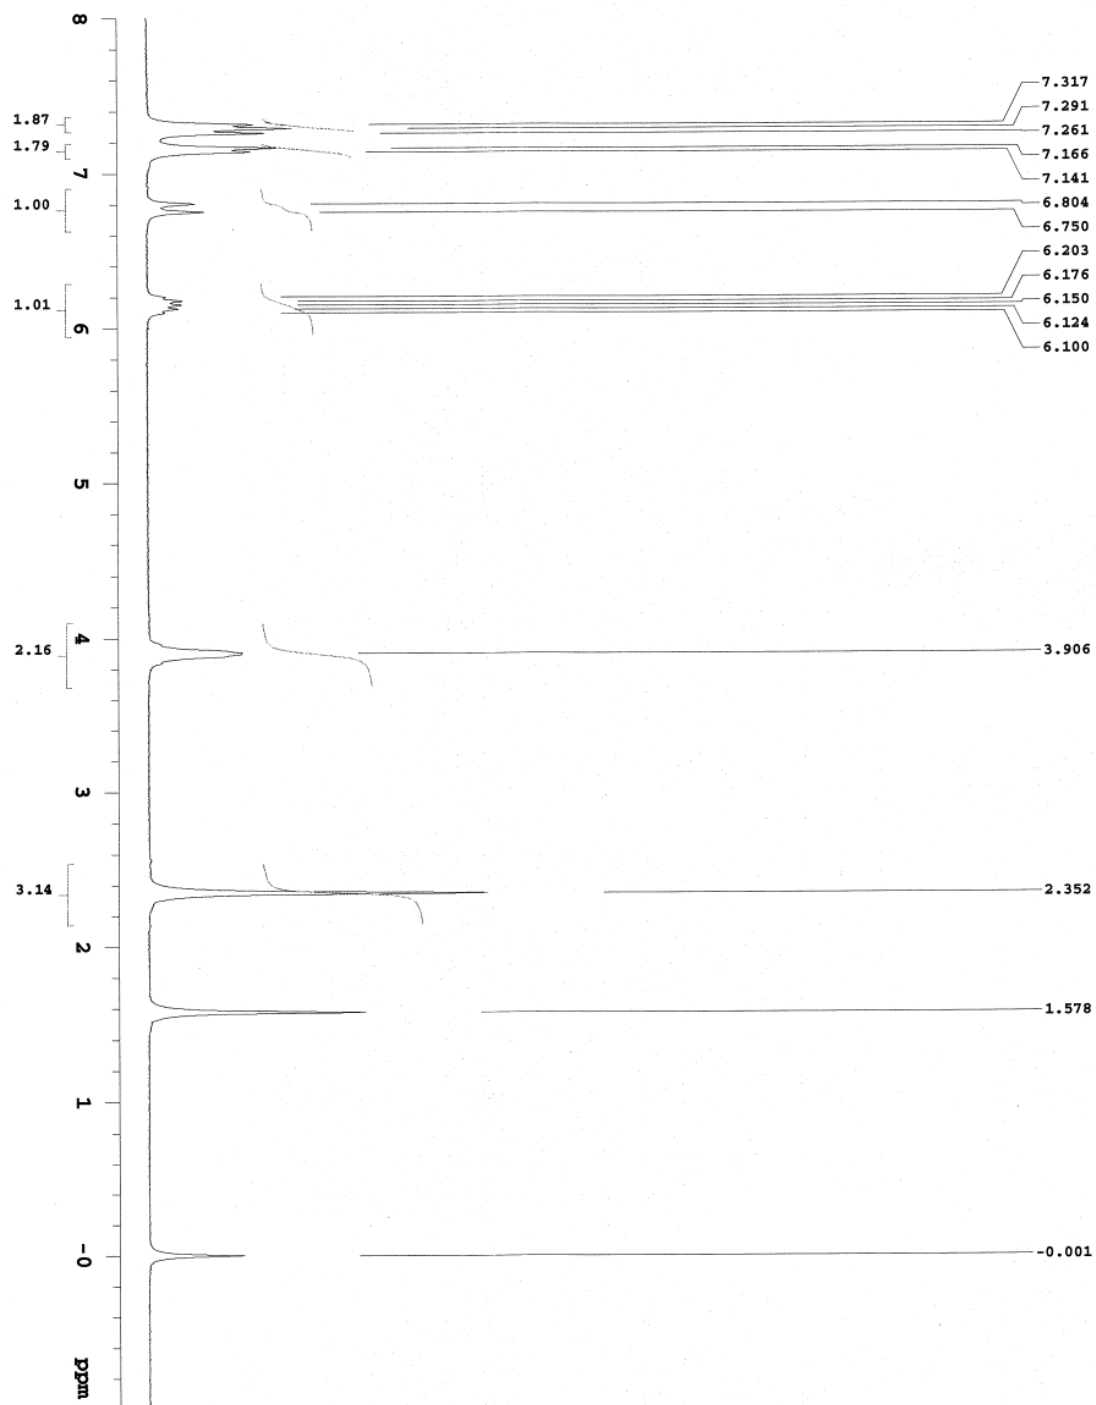

Copies of  $^{19}\text{F}$  NMR and  $^1\text{H}$  NMR

1-methoxy-4-((*E*)-3-(trifluoromethylsulfinyl)prop-1-enyl)benzene (3e)

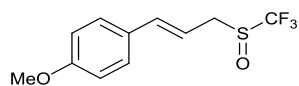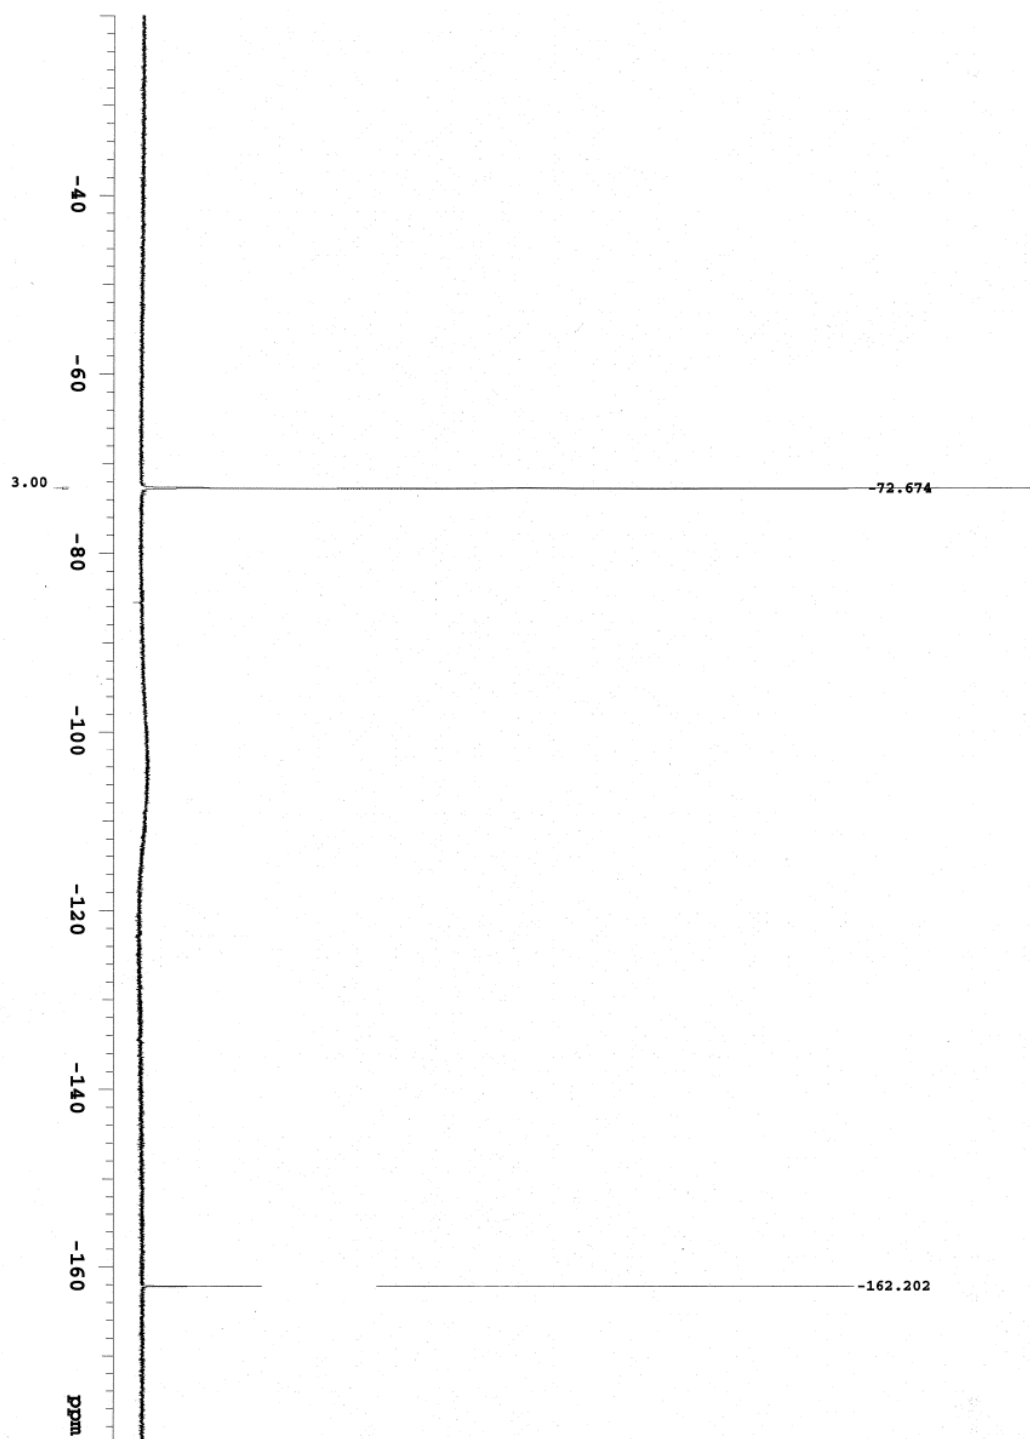

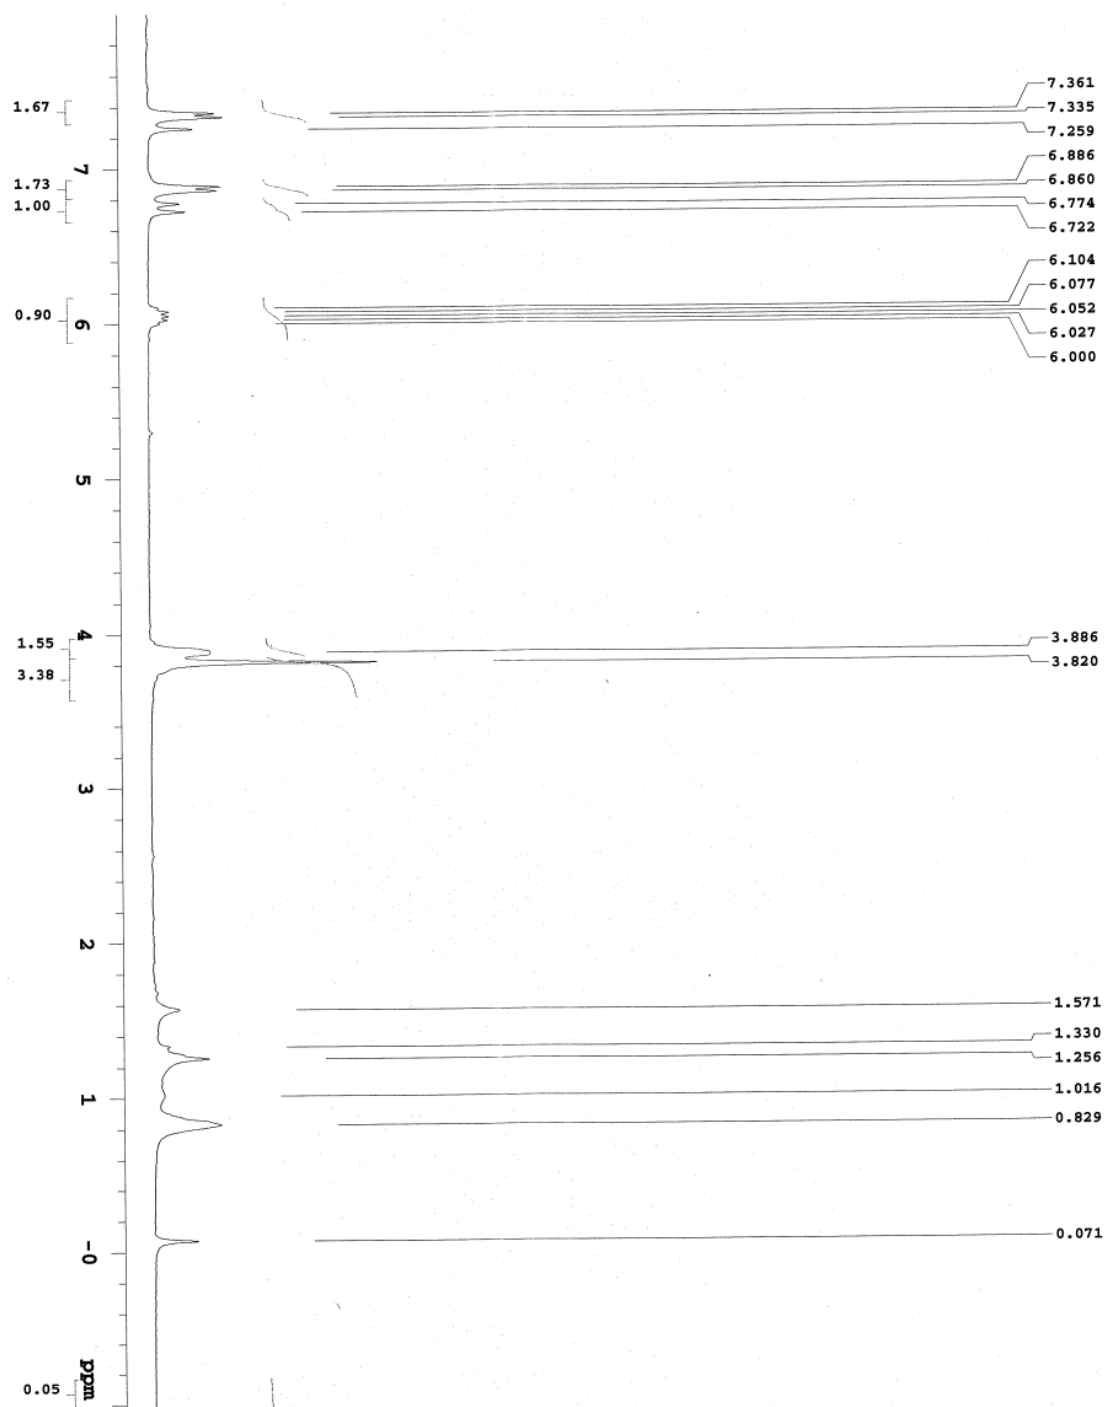

Copies of  $^{19}\text{F}$  NMR and  $^1\text{H}$  NMR

1-methoxy-3-((*E*)-3-(trifluoromethylsulfinyl)prop-1-enyl)benzene (3f)

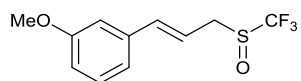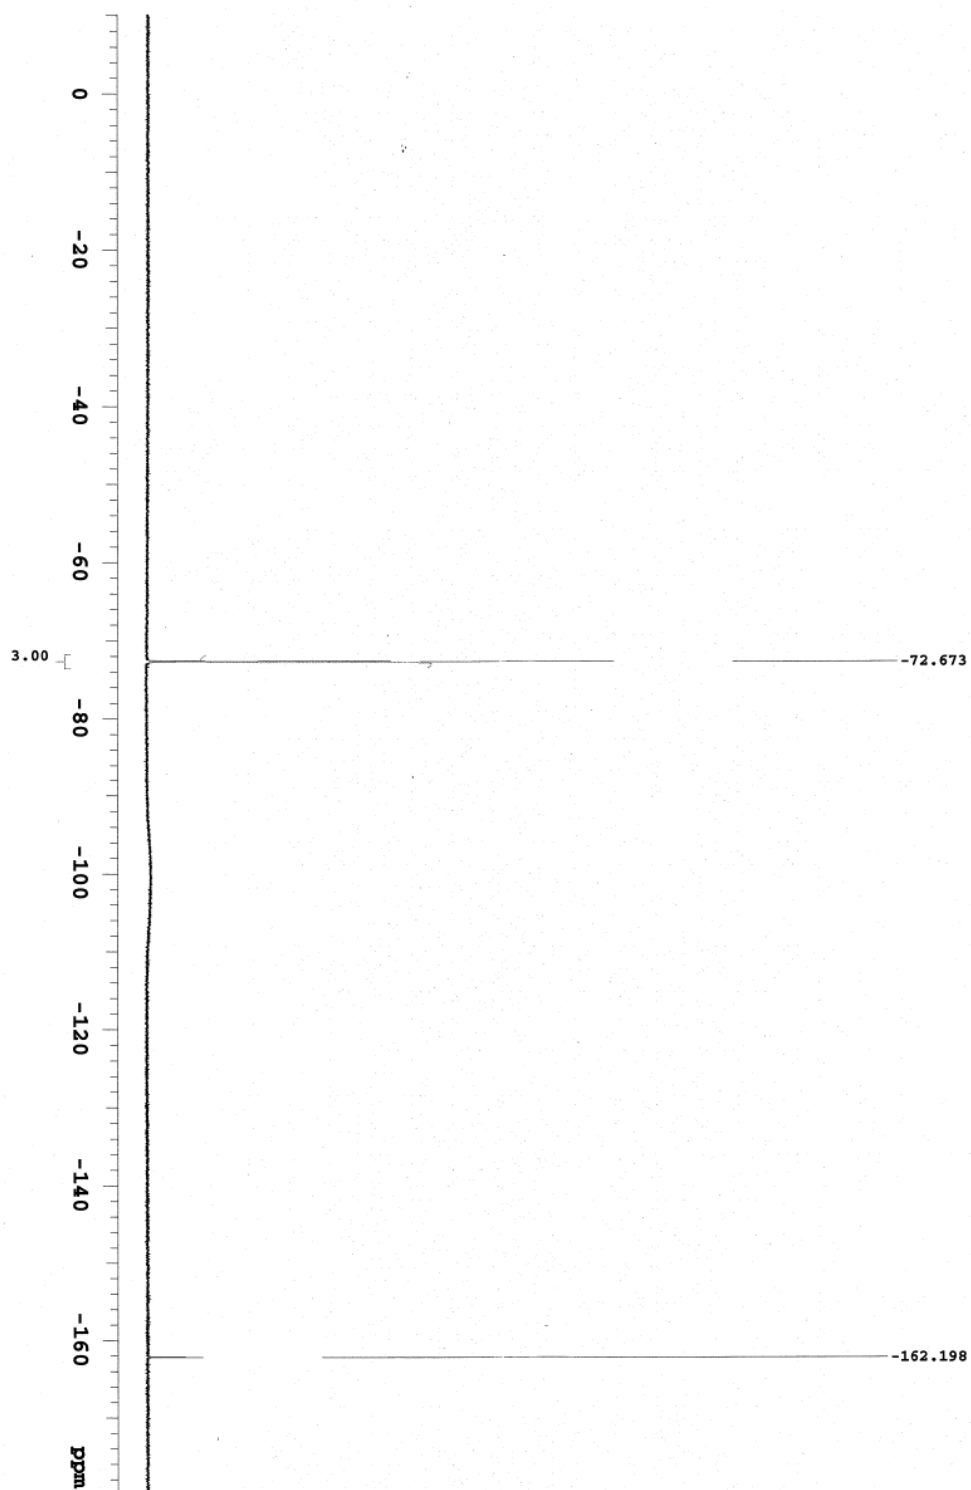

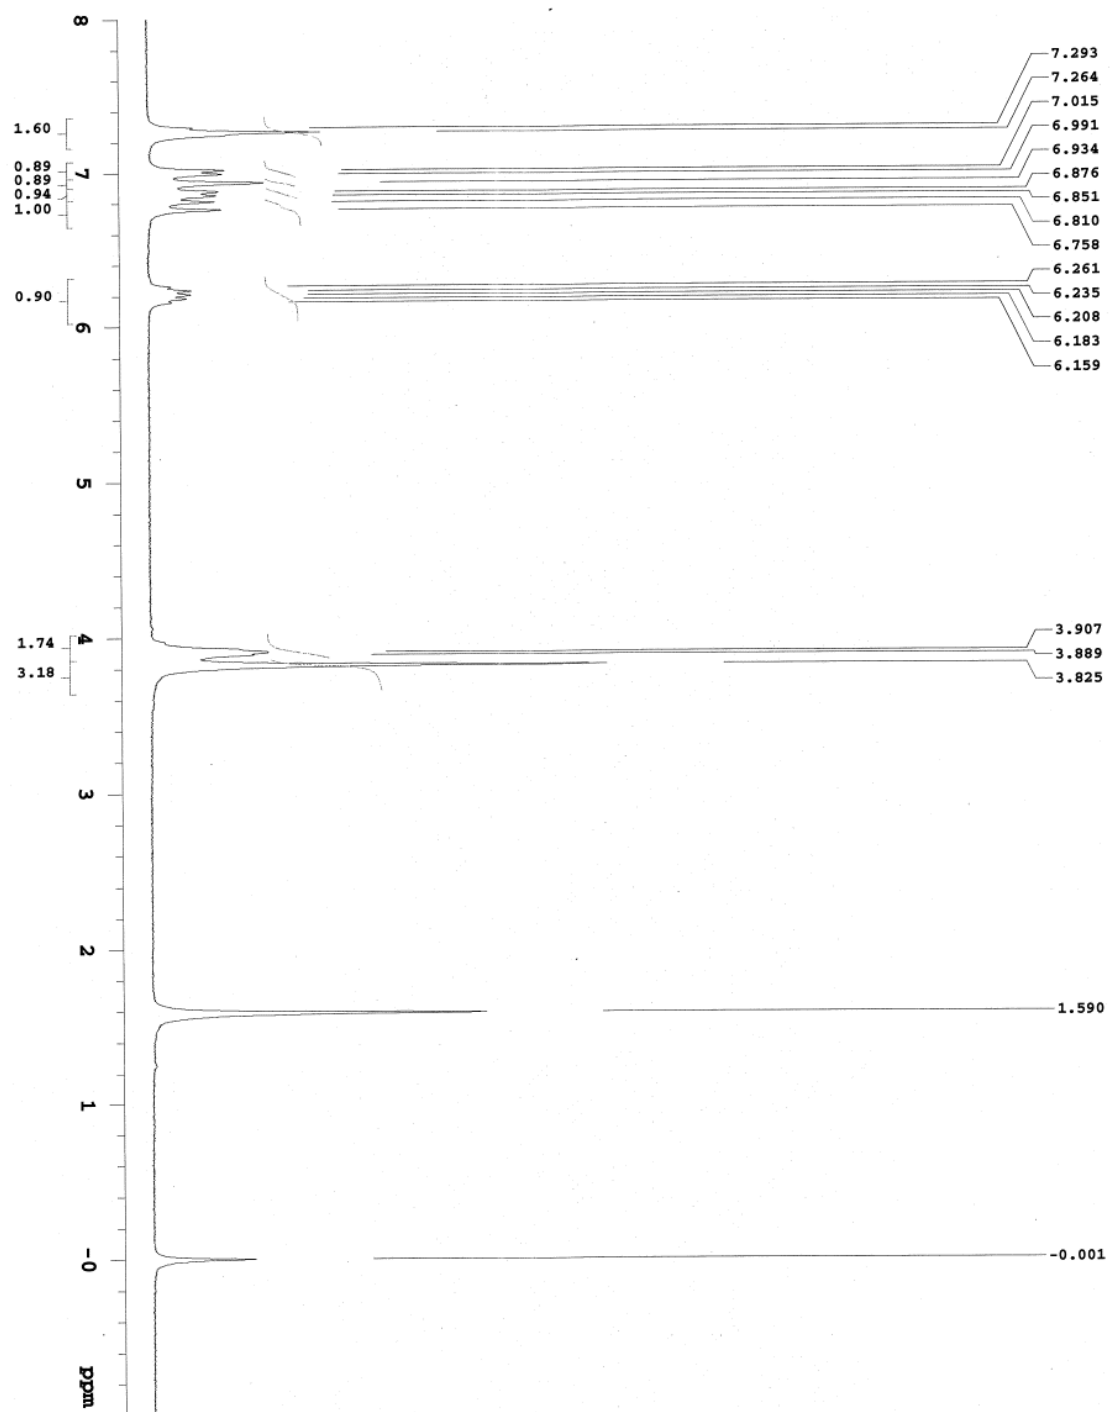



Copies of  $^{19}\text{F}$  NMR and  $^1\text{H}$  NMR

(*E*)-1-methoxy-2-(3-((trifluoromethyl)sulfinyl)prop-1-en-1-yl)benzene (3g)

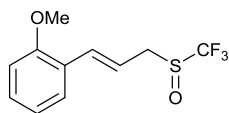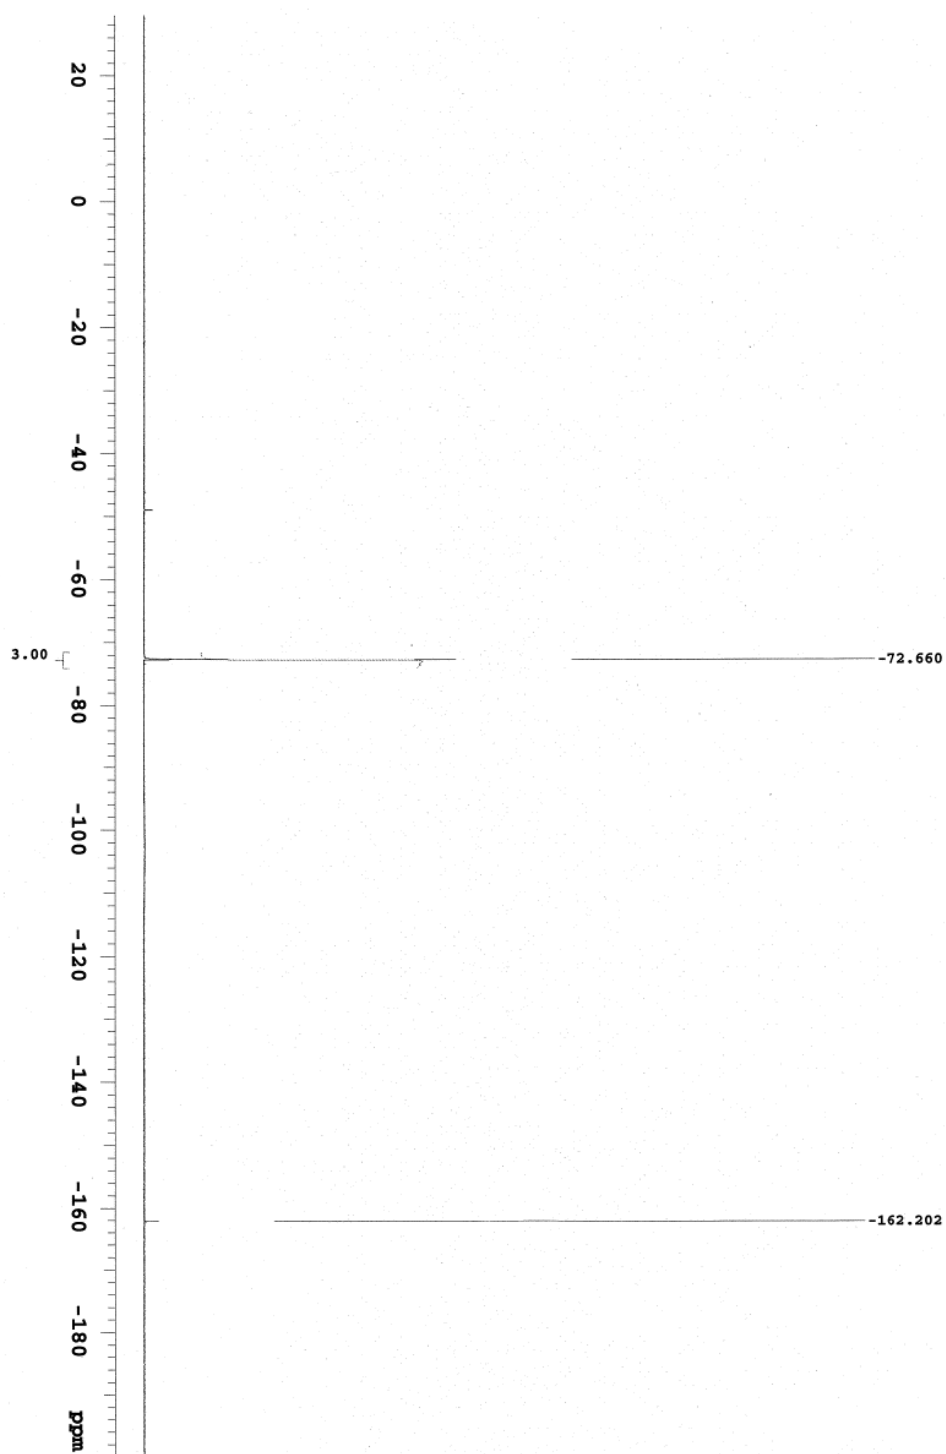

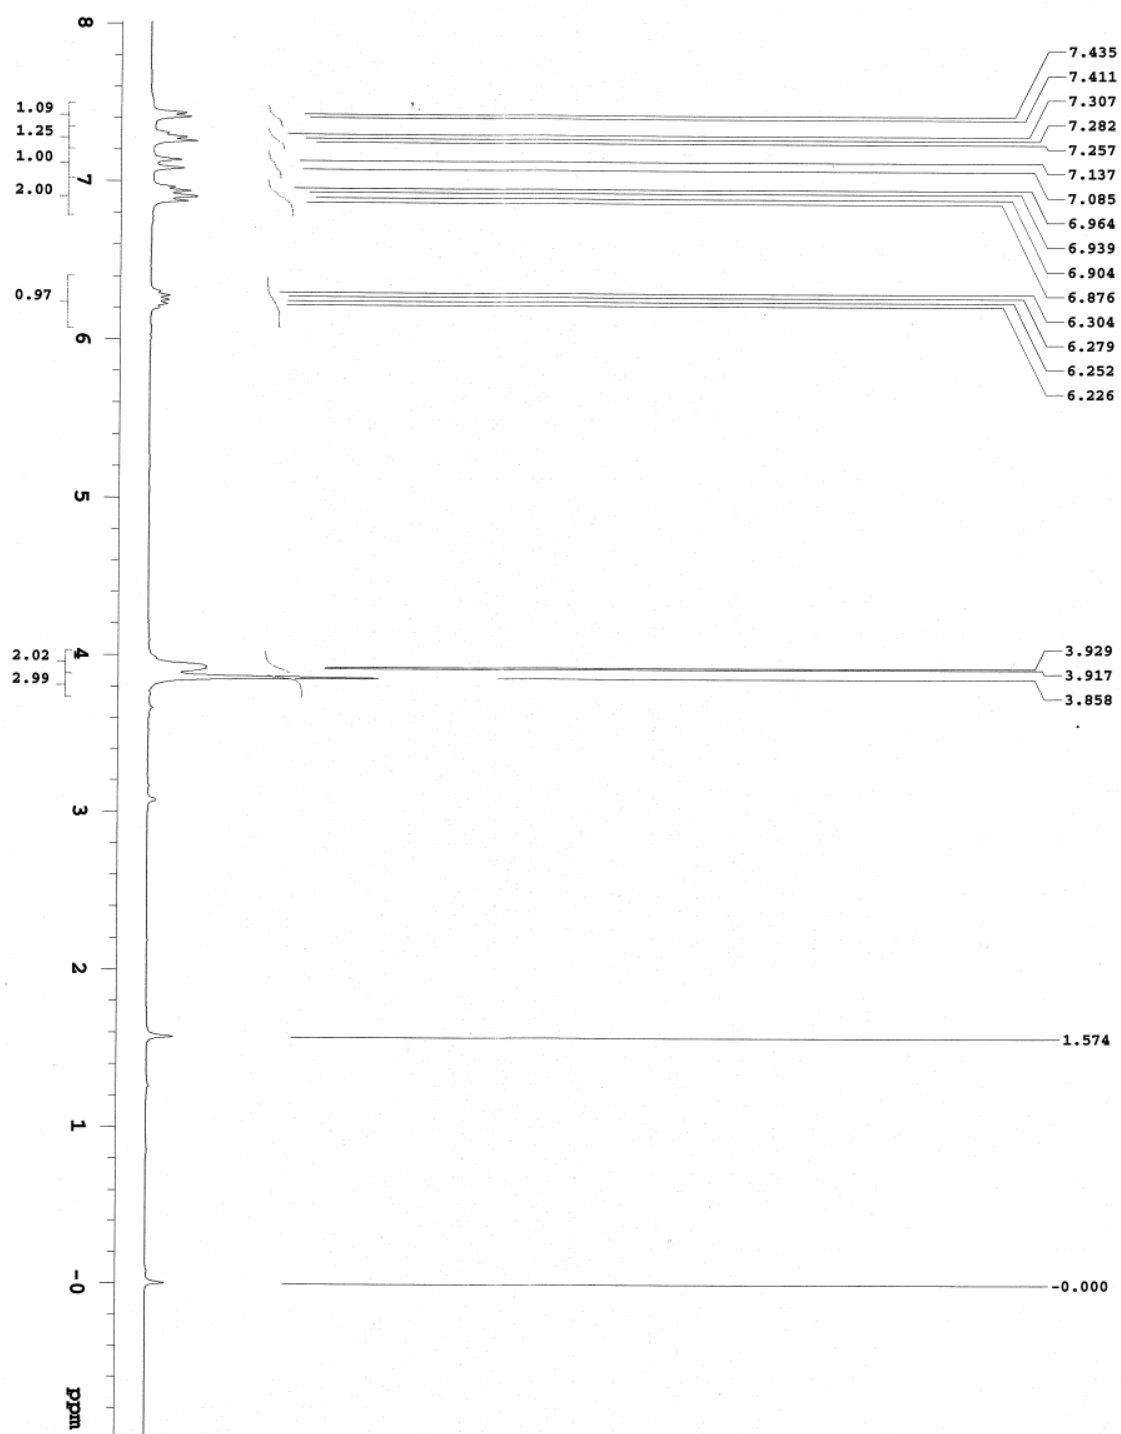

Copies of  $^{19}\text{F}$  NMR and  $^1\text{H}$  NMR

1-Chloro-4-((*E*)-3-(trifluoromethylsulfinyl)prop-1-enyl)benzene (3h)

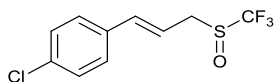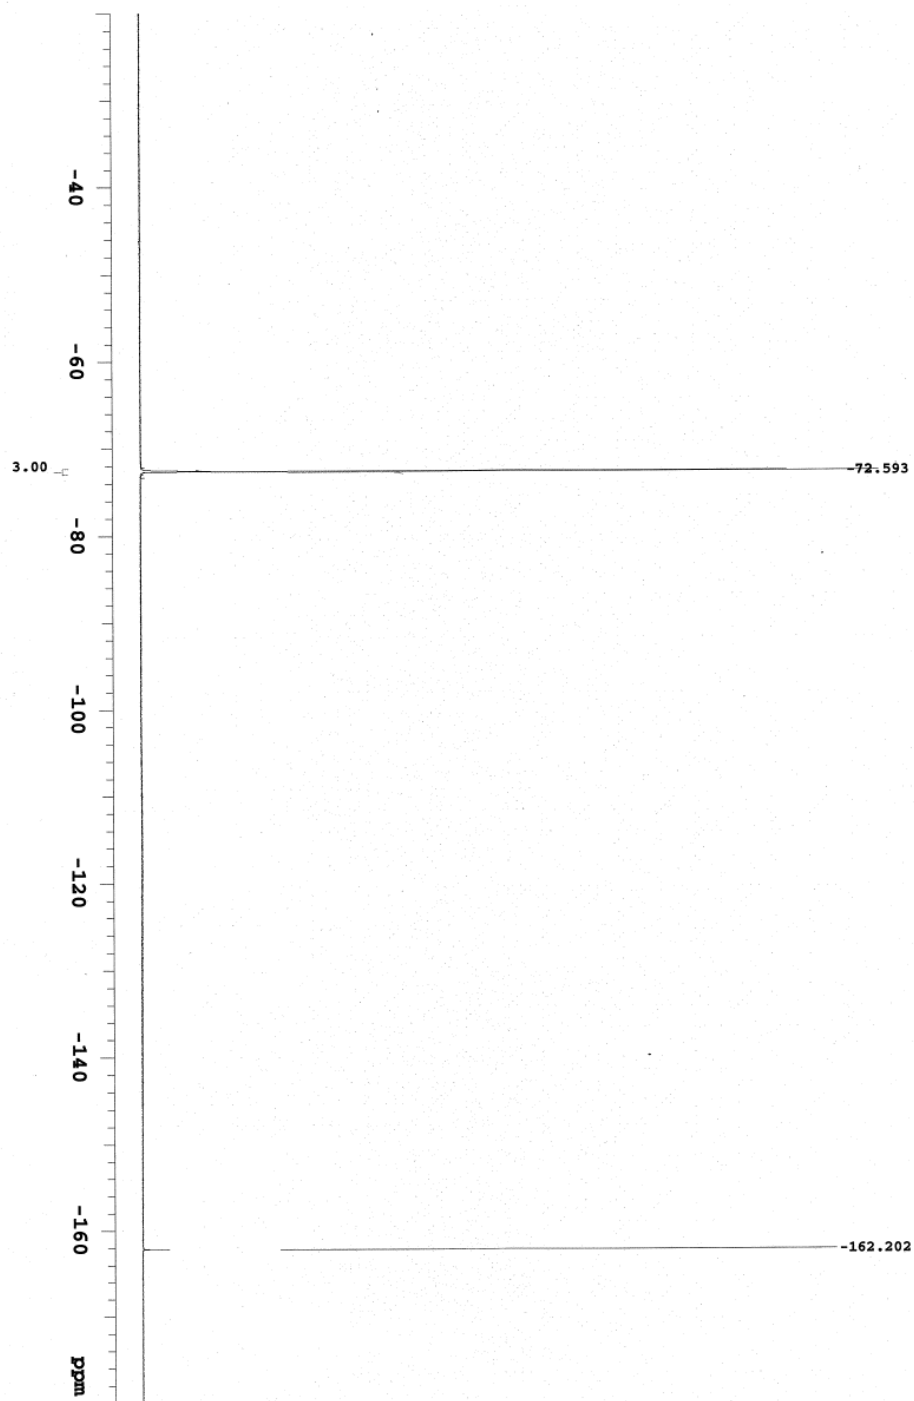

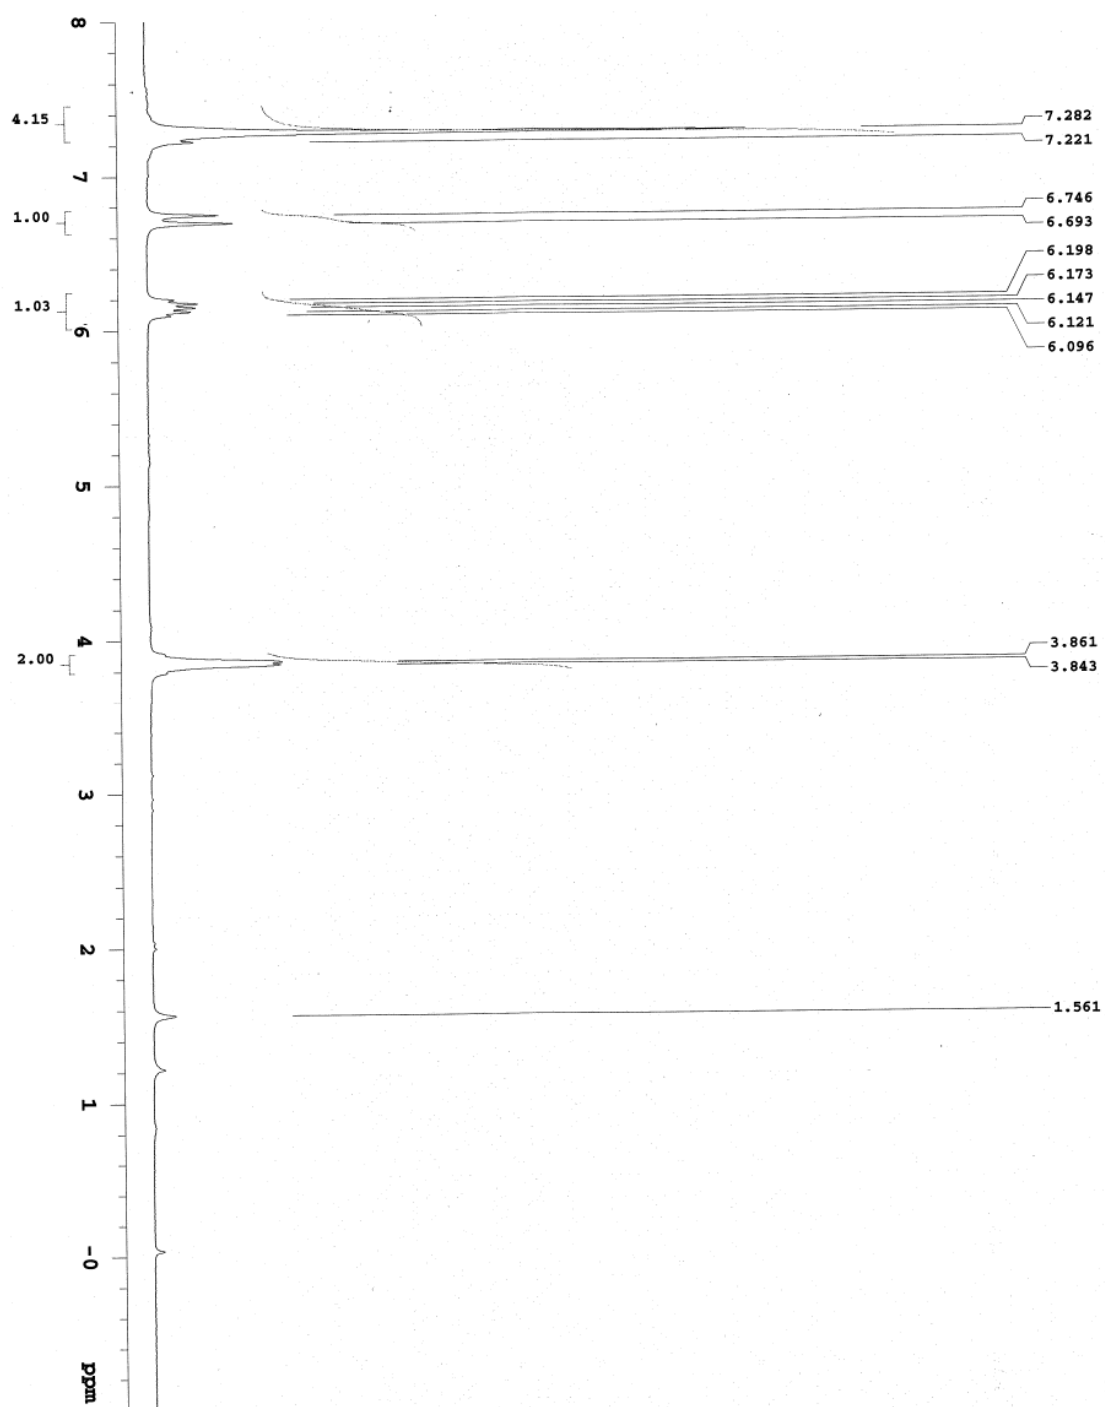

Copies of  $^{19}\text{F}$  NMR and  $^1\text{H}$  NMR

1-(Trifluoromethyl)-4-((*E*)-3-(trifluoromethylsulfinyl)prop-1-enyl)benzene  
(3i)

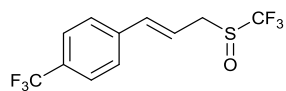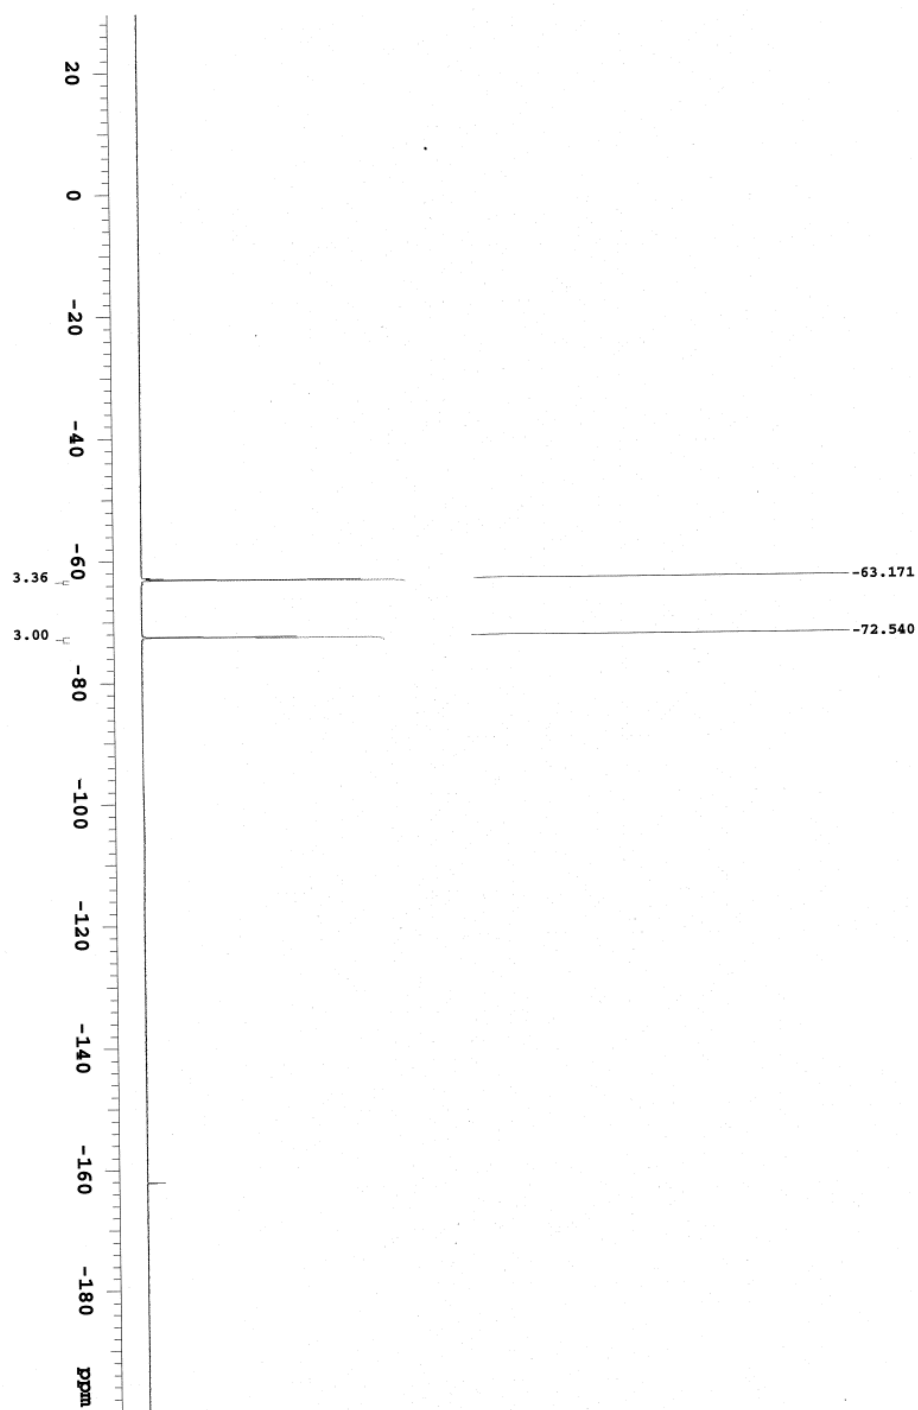

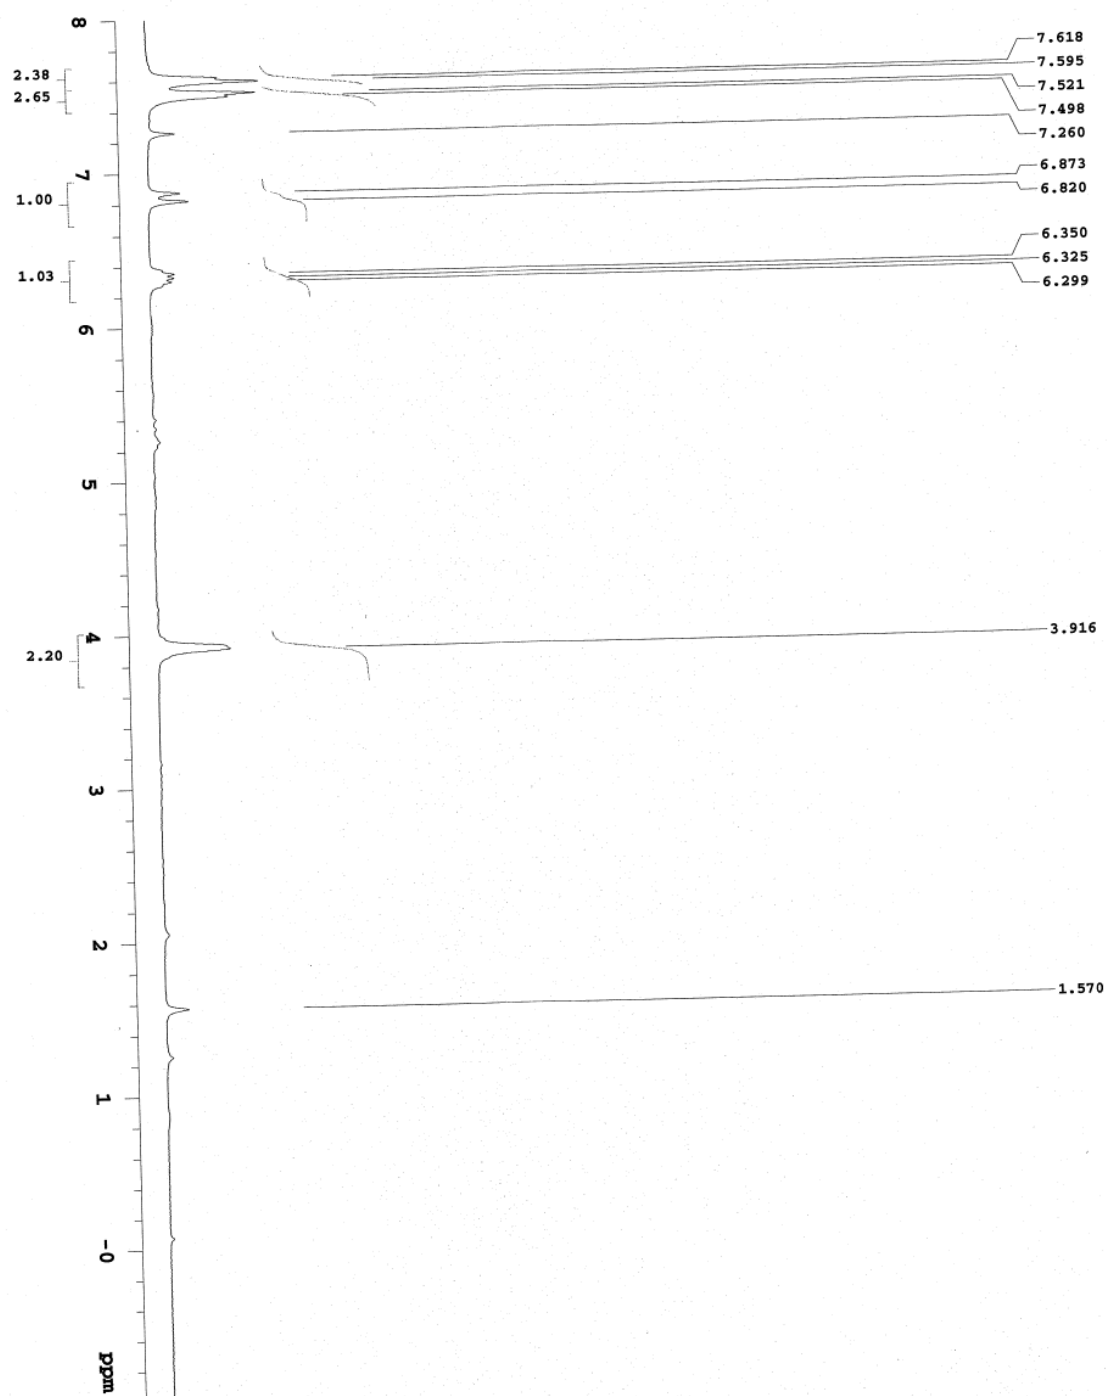

Copies of  $^{19}\text{F}$  NMR and  $^1\text{H}$  NMR

2-((*E*)-3-(trifluoromethylsulfinyl)prop-1-enyl)thiophene (3j)

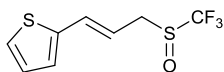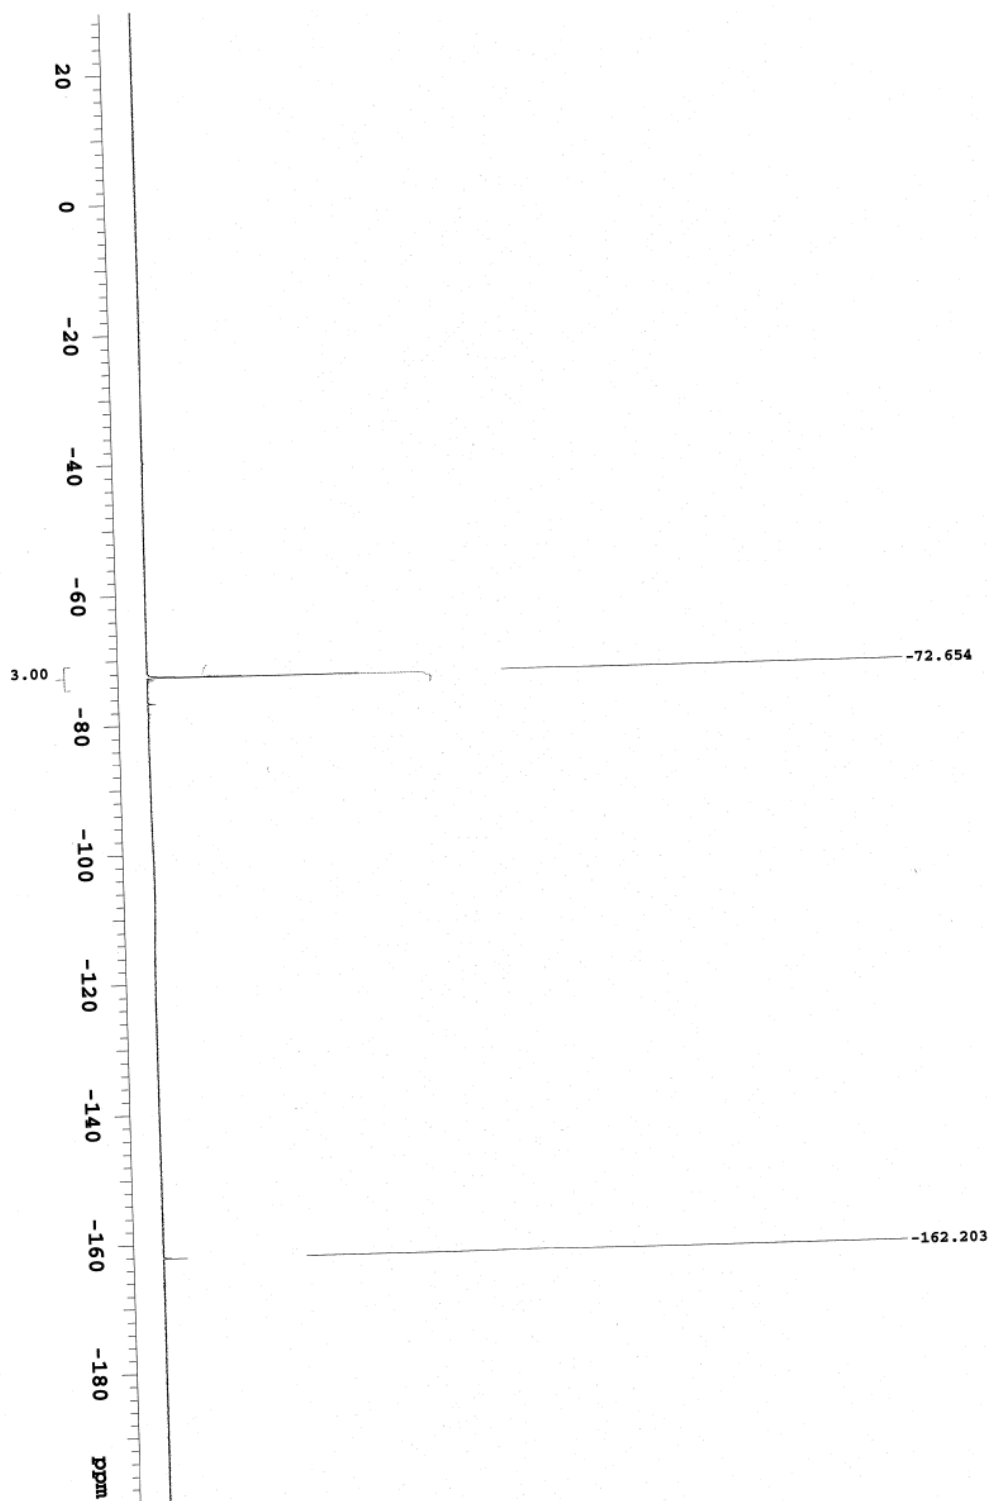

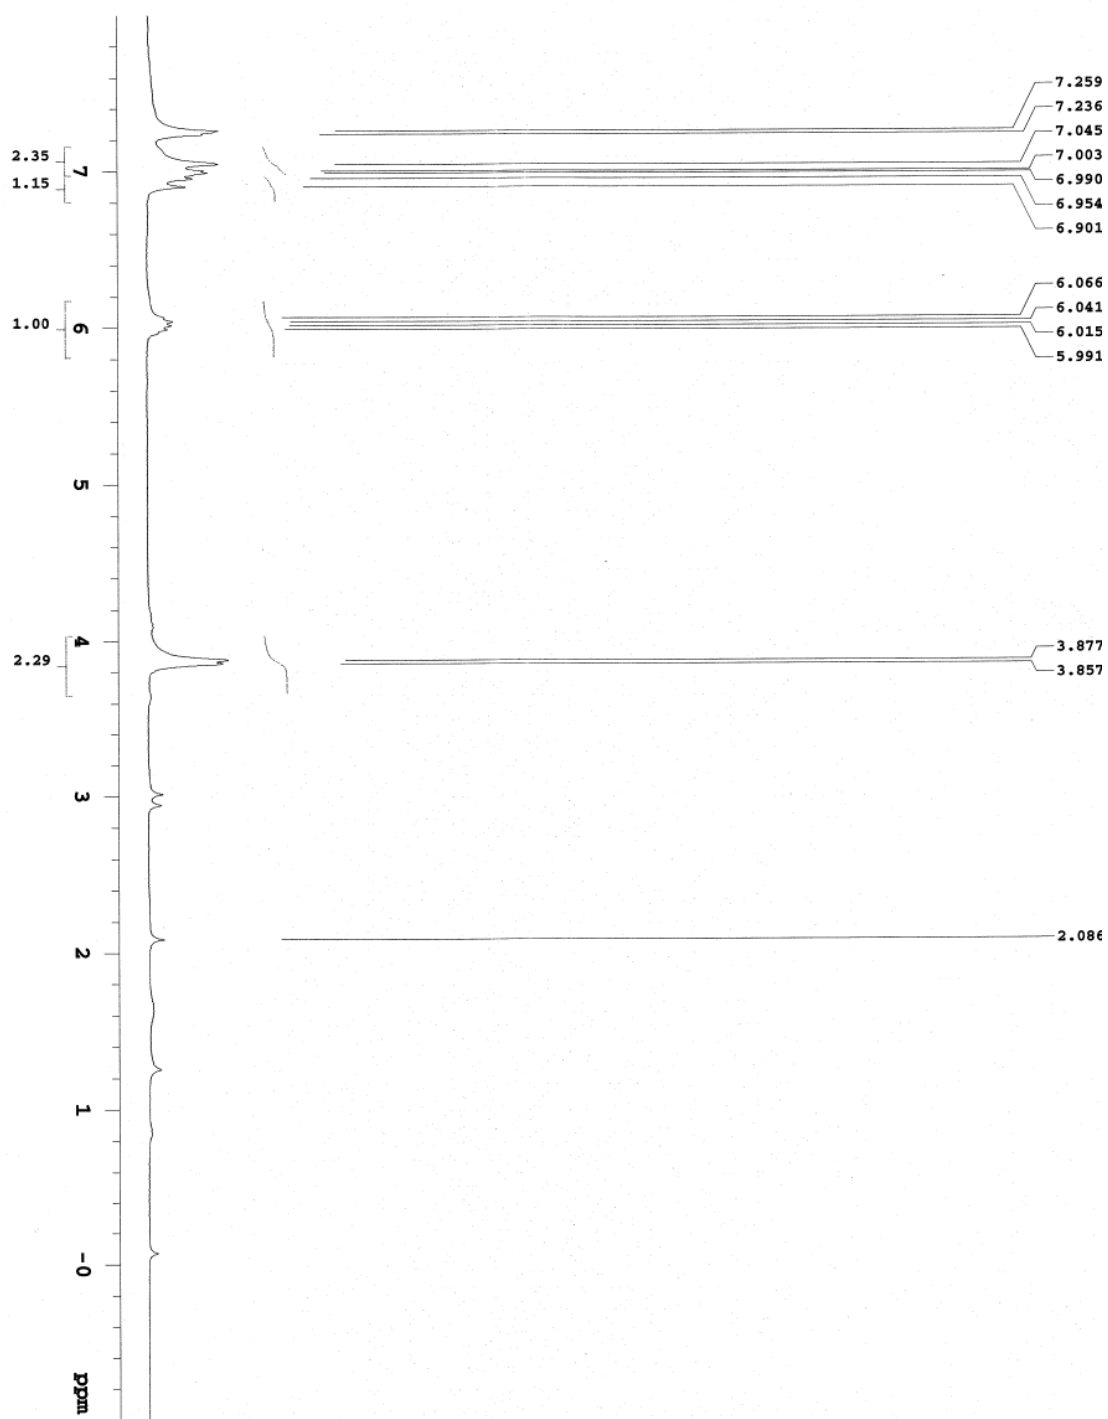



Copies of  $^{19}\text{F}$  NMR,  $^1\text{H}$  NMR and  $^{13}\text{C}$  NMR

3-((*E*)-3-(Trifluoromethylsulfinyl)prop-1-enyl)furan (3k)

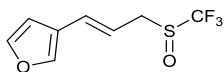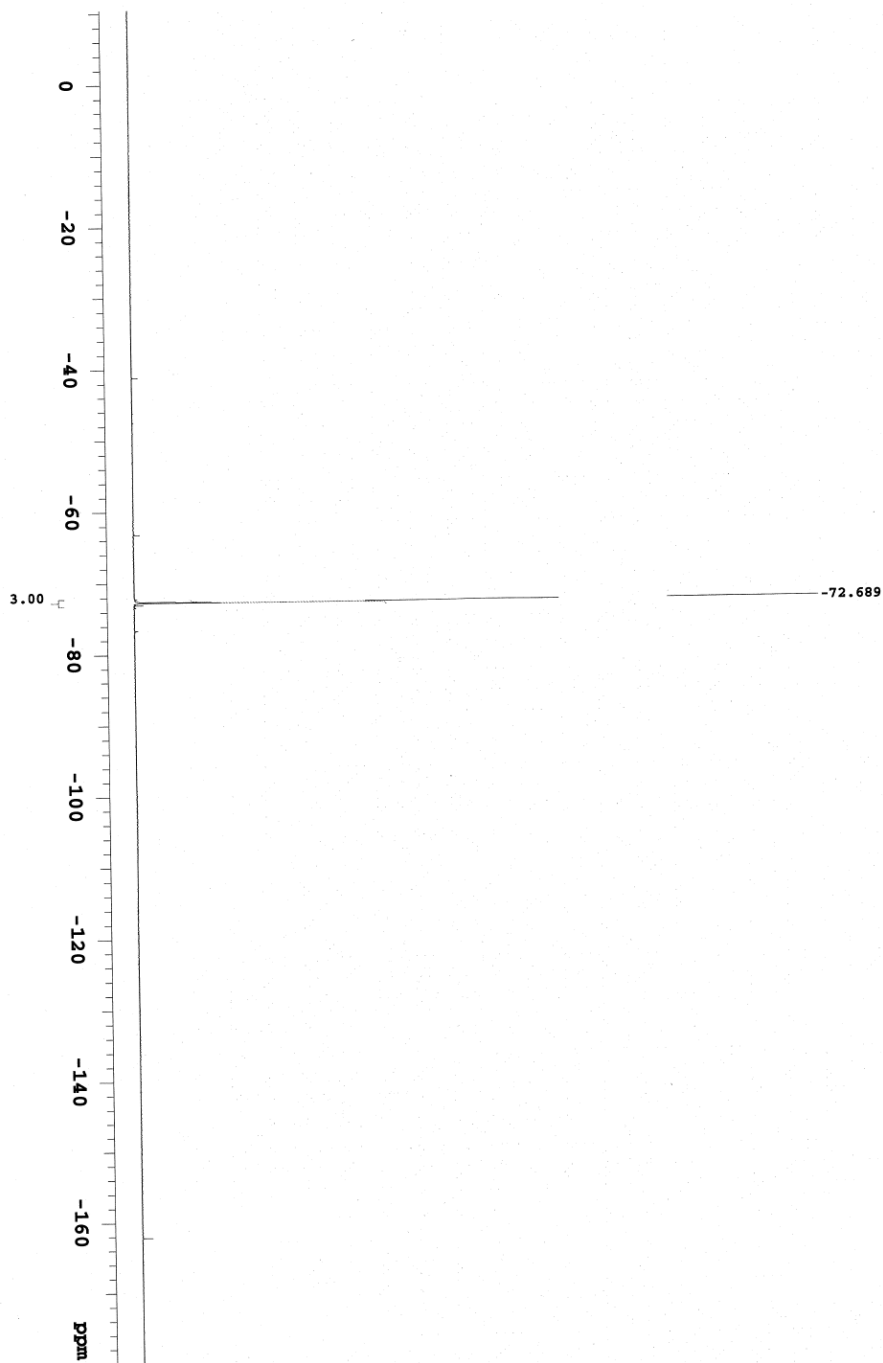

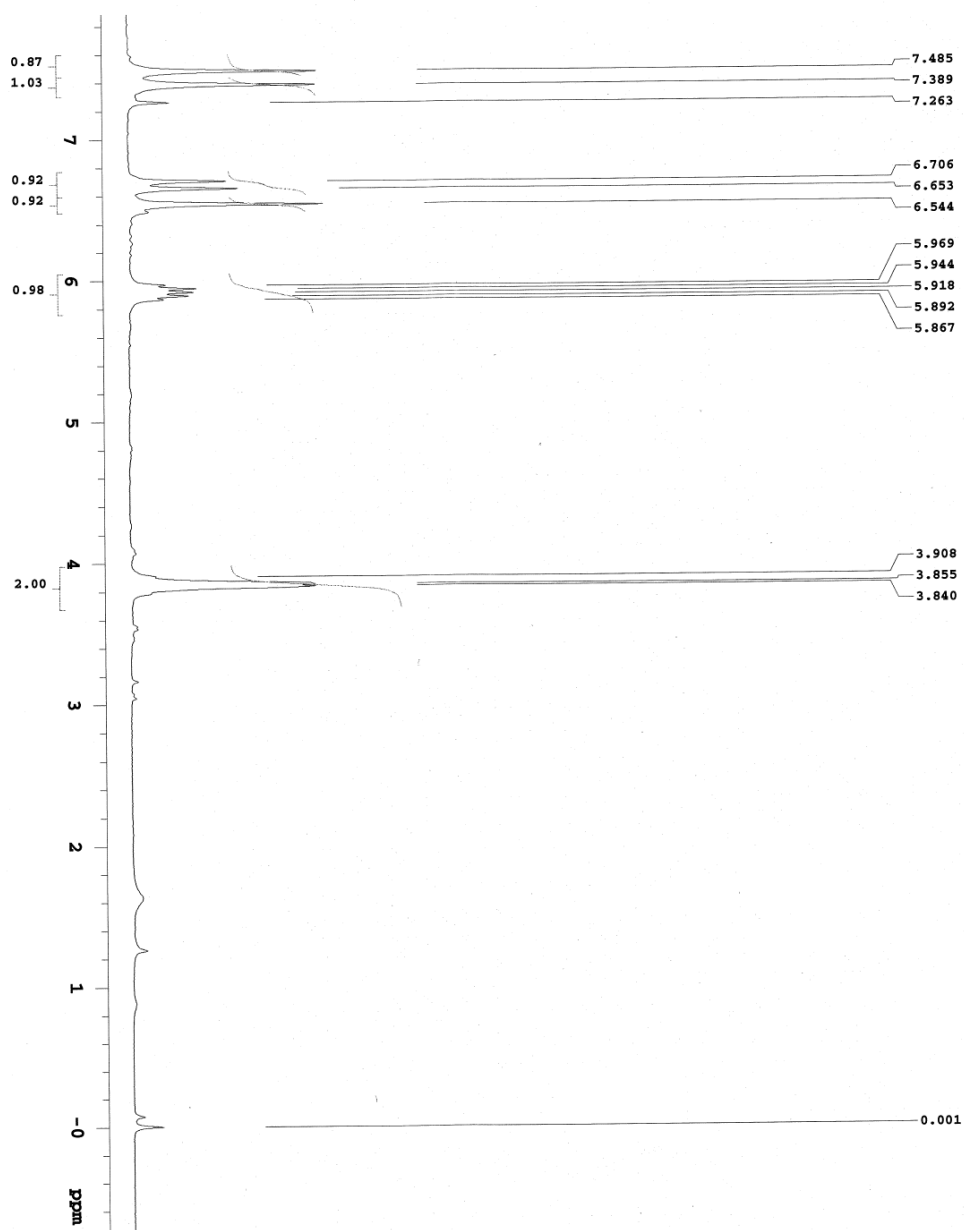

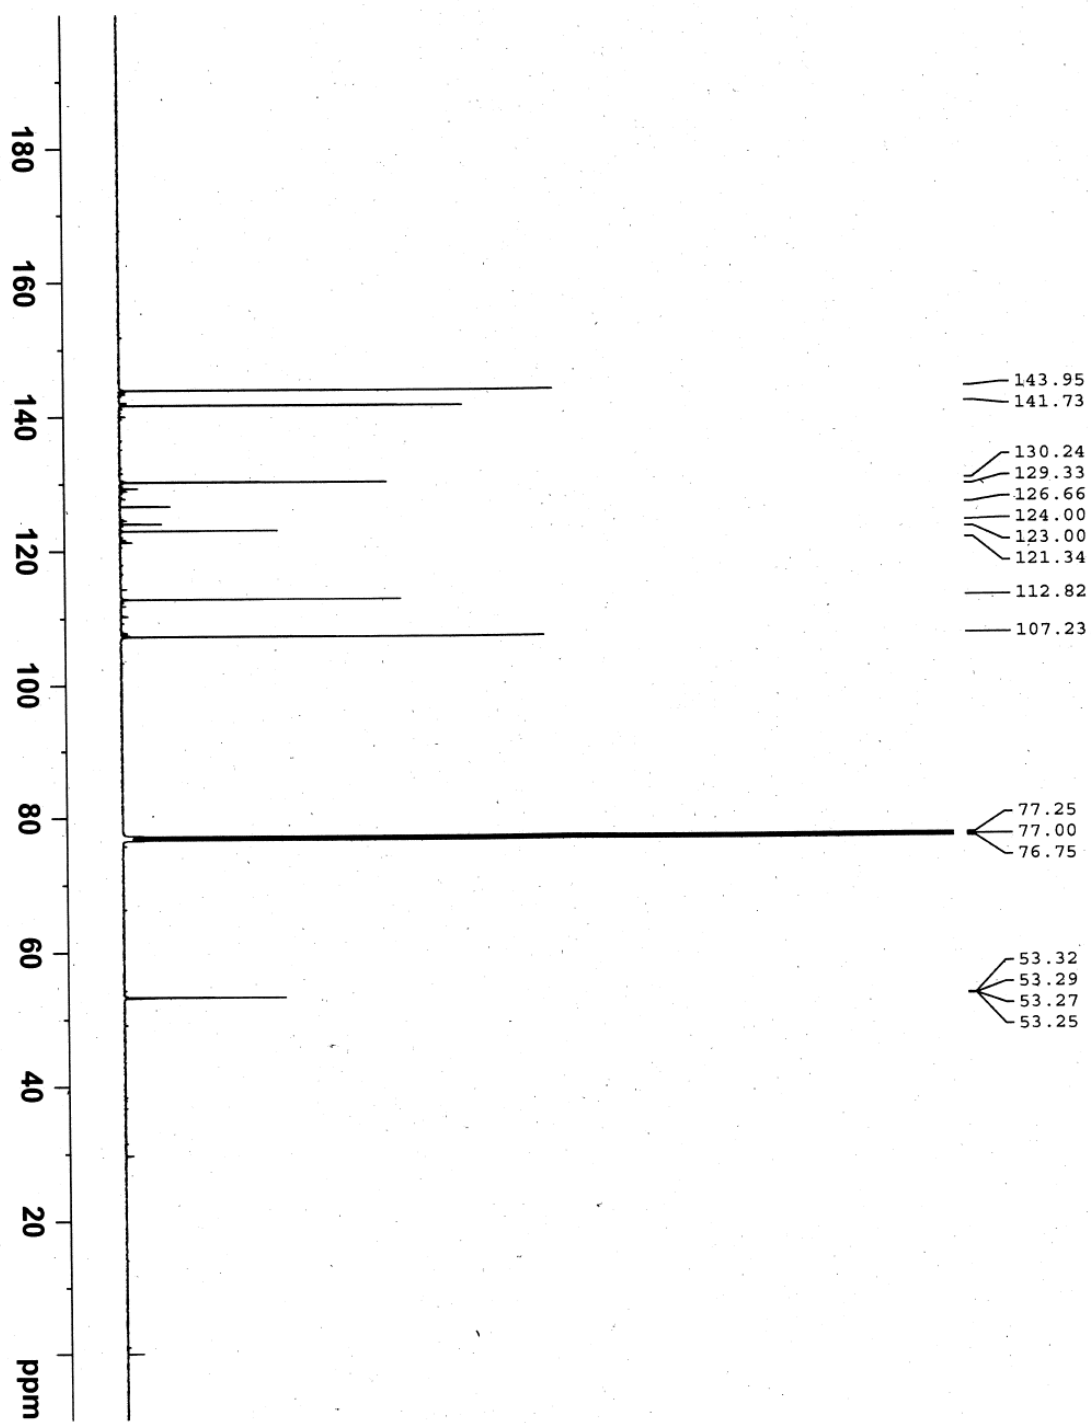

Copies of  $^{19}\text{F}$  NMR and  $^1\text{H}$  NMR

1-((*E*)-5-(trifluoromethylsulfinyl)pent-3-enyl)benzene (3l)

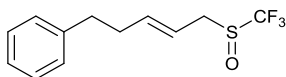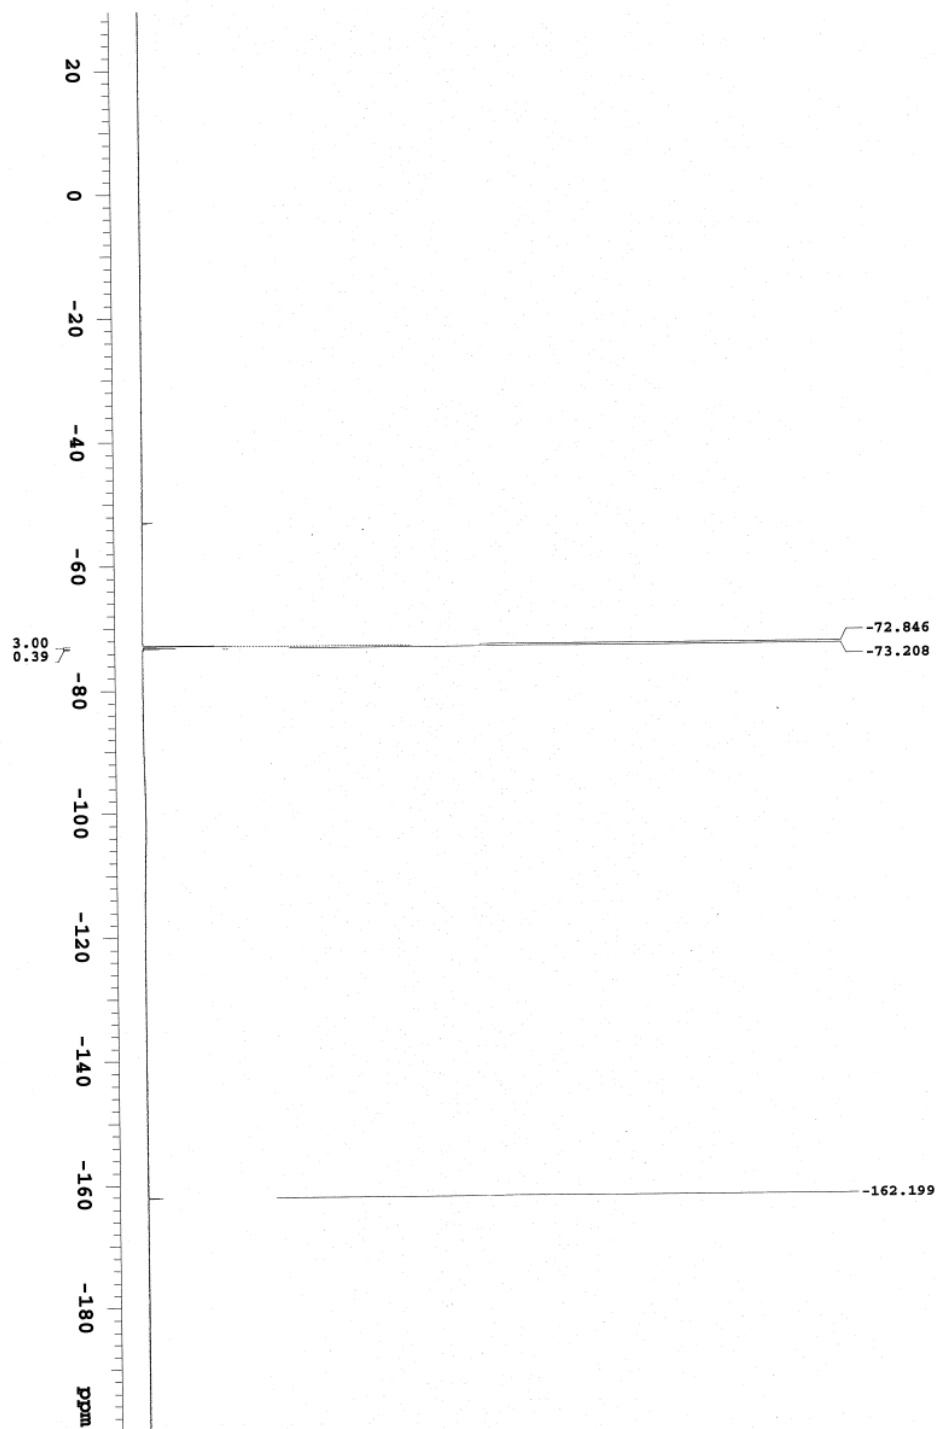

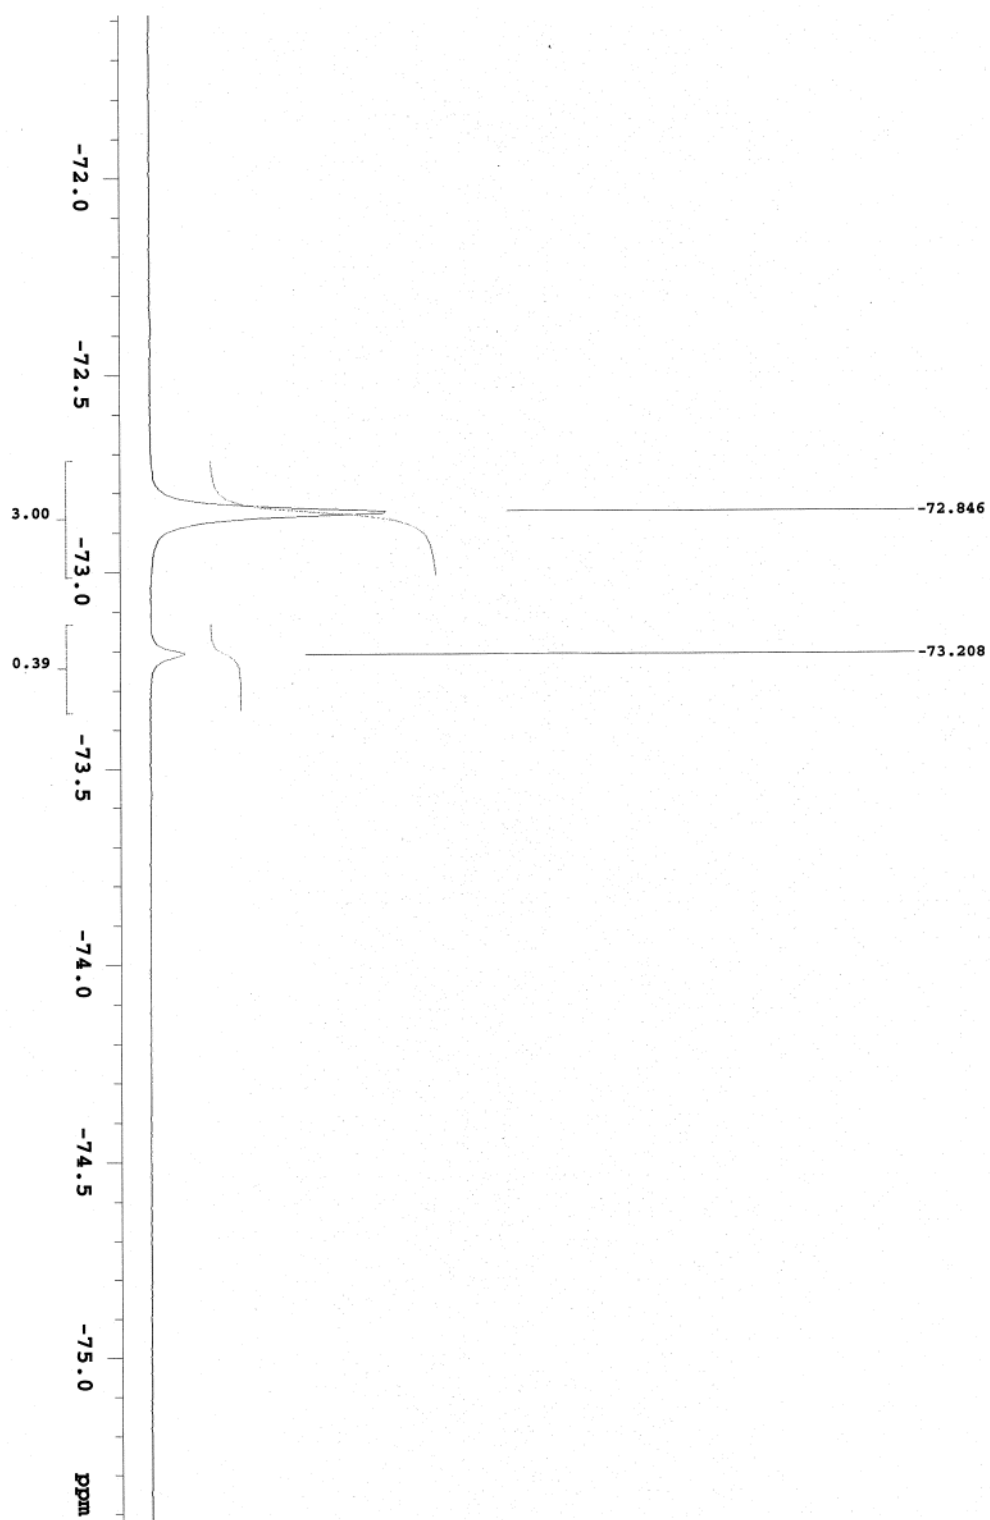

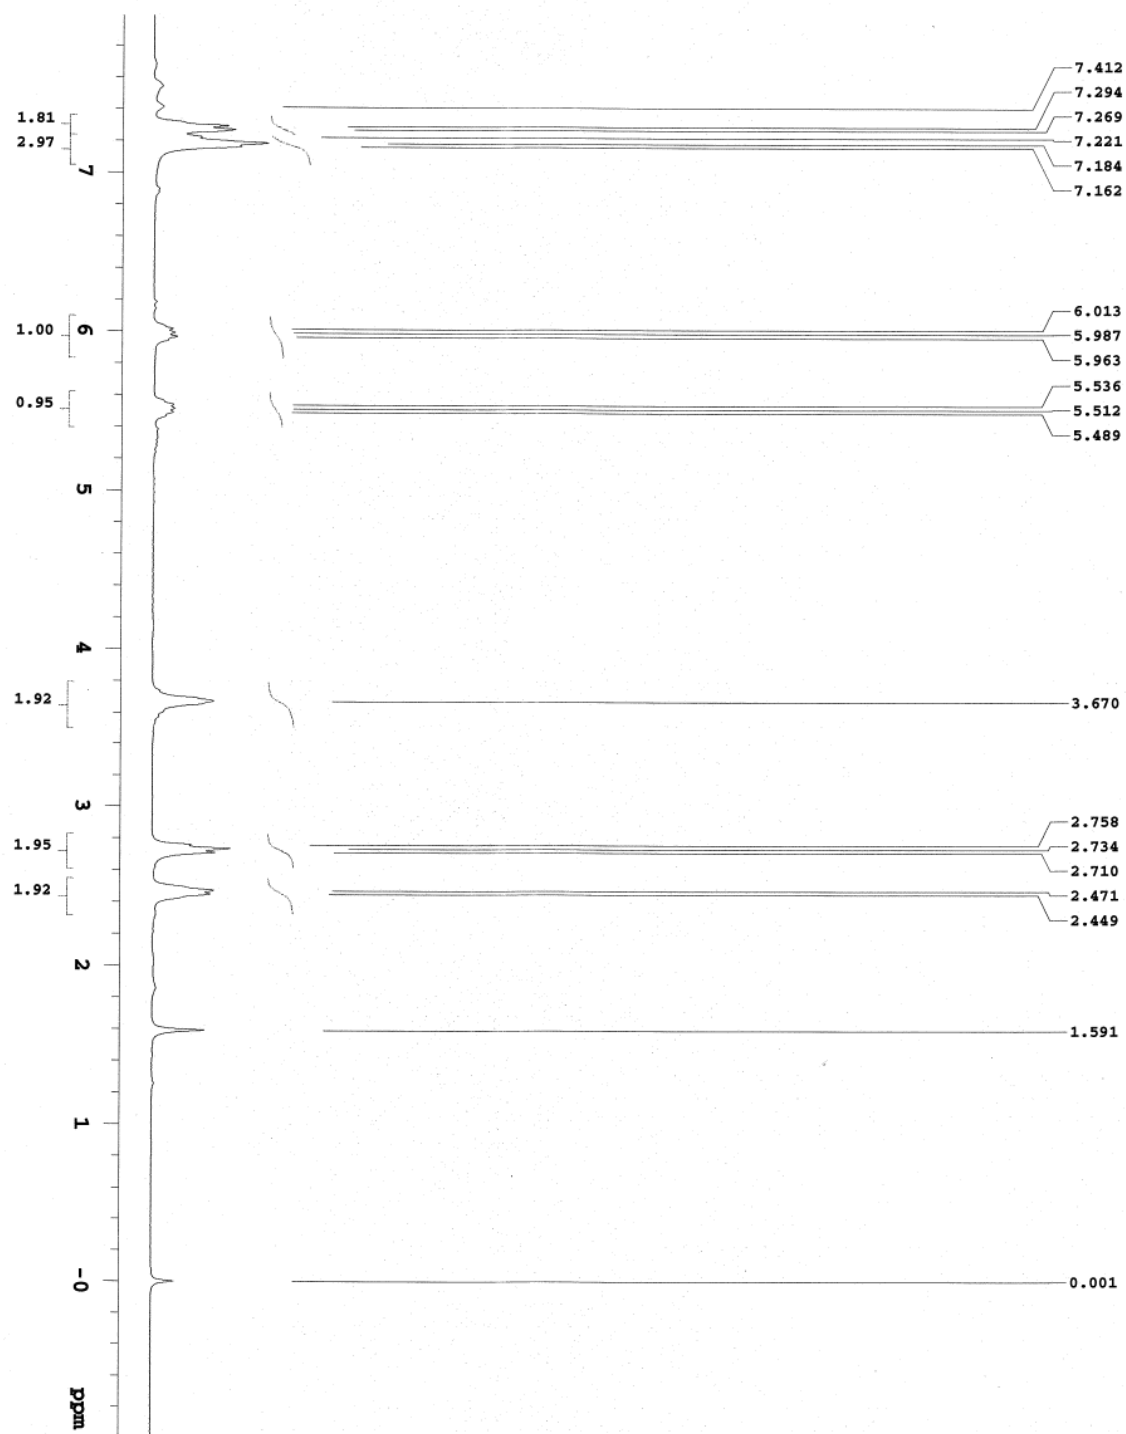

Copies of  $^{19}\text{F}$  NMR and  $^1\text{H}$  NMR

1-((*E*)-3-(trifluoromethylsulfinyl)but-1-enyl)benzene (3m)

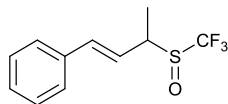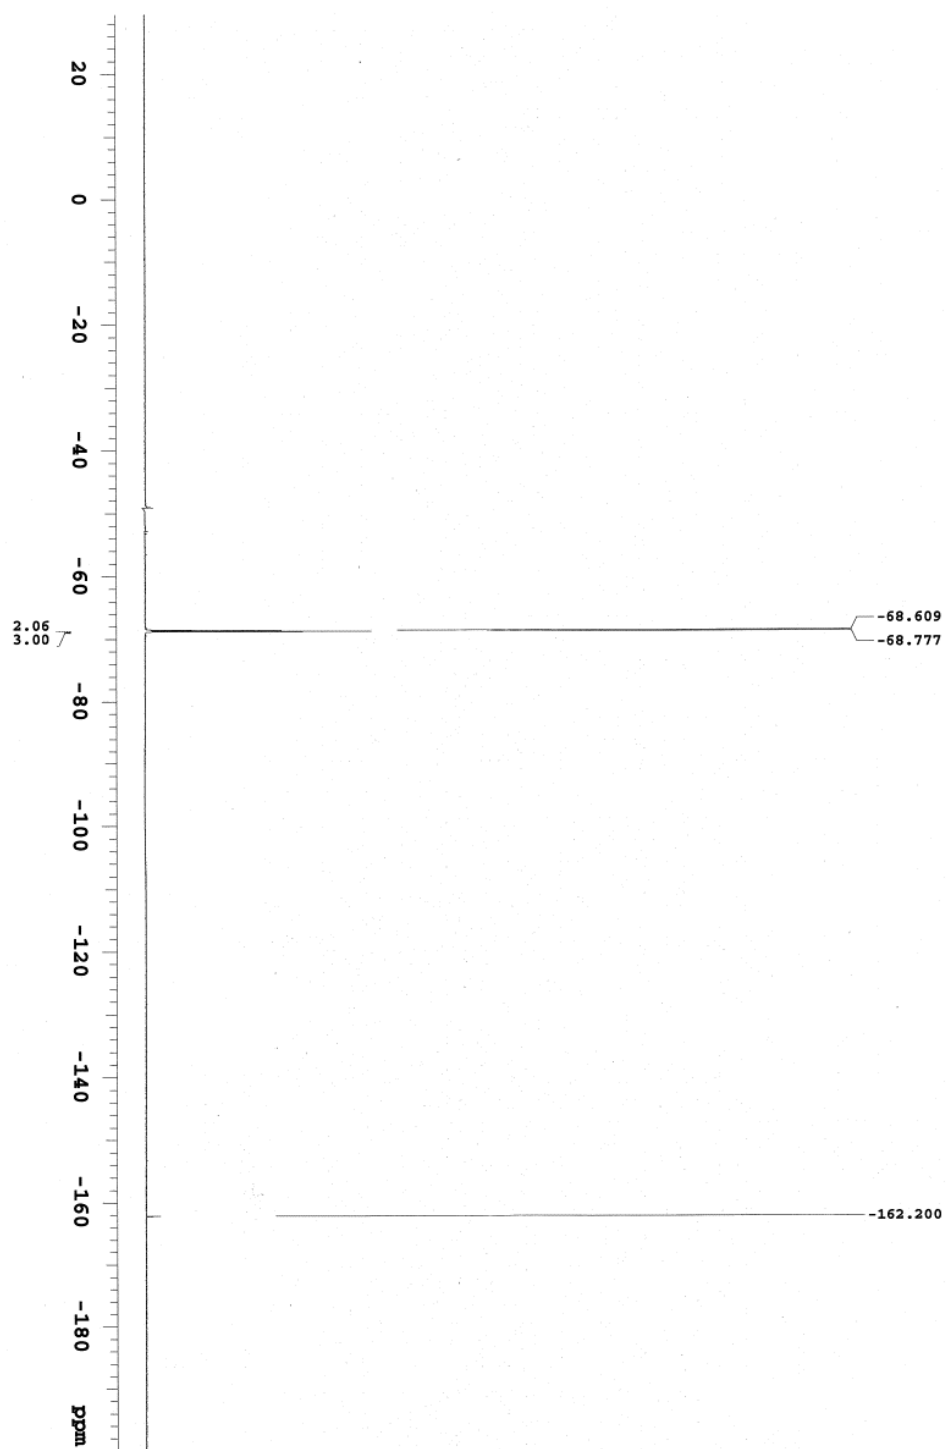

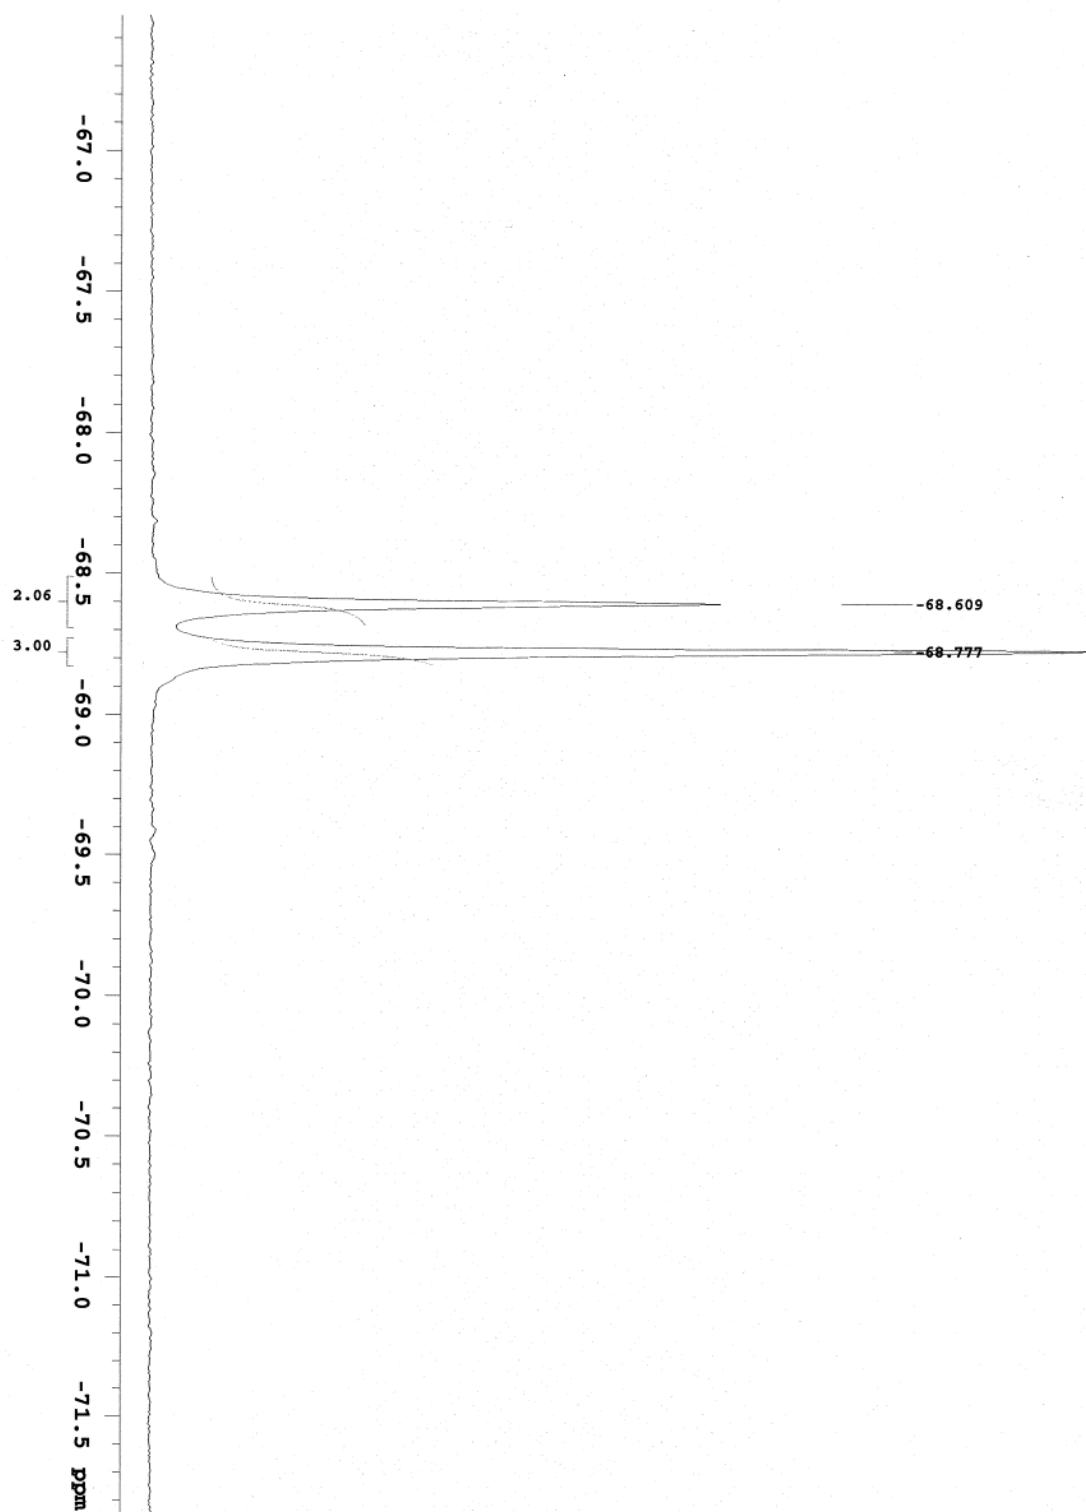

ESI40



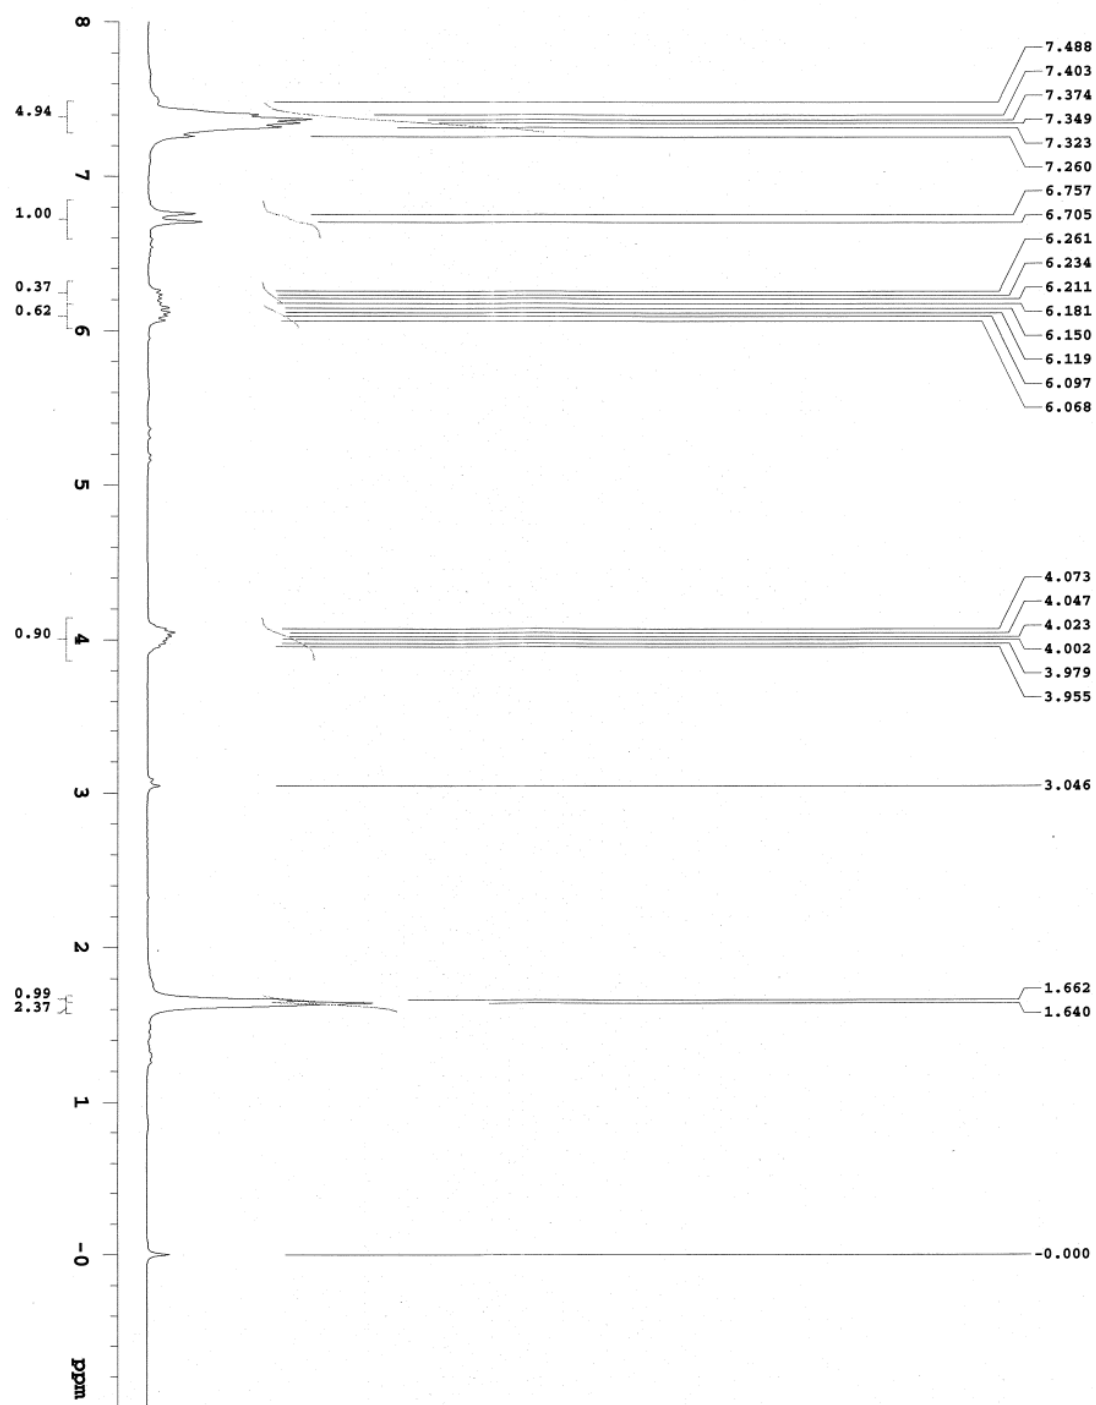

Copies of  $^{19}\text{F}$  NMR and  $^1\text{H}$  NMR

1-((*E*)-2-methyl-3-(trifluoromethylsulfinyl)prop-1-enyl)benzene (3n)

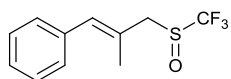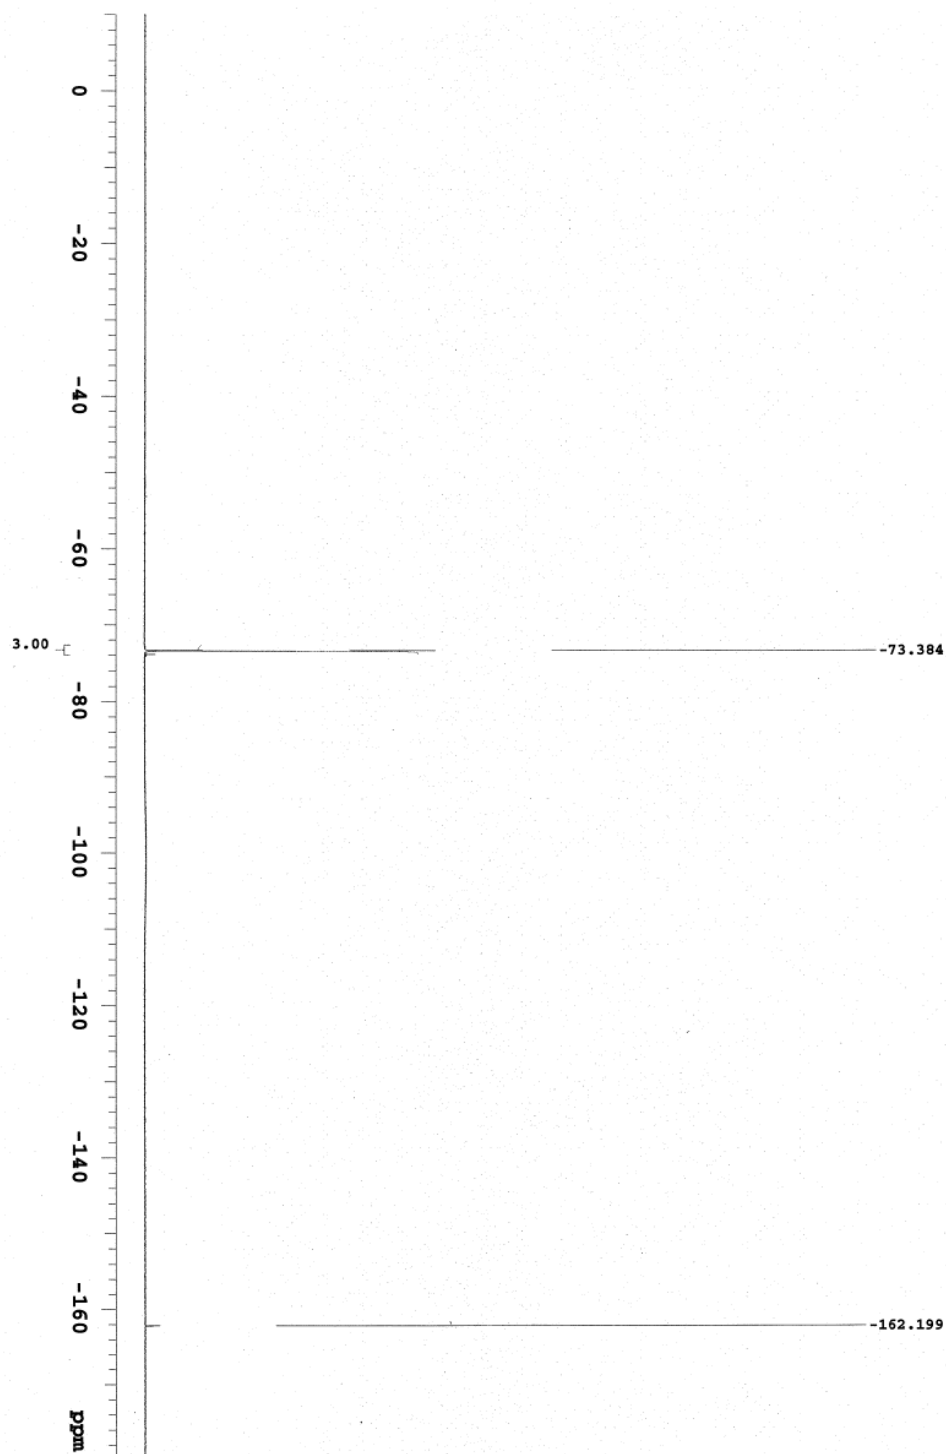

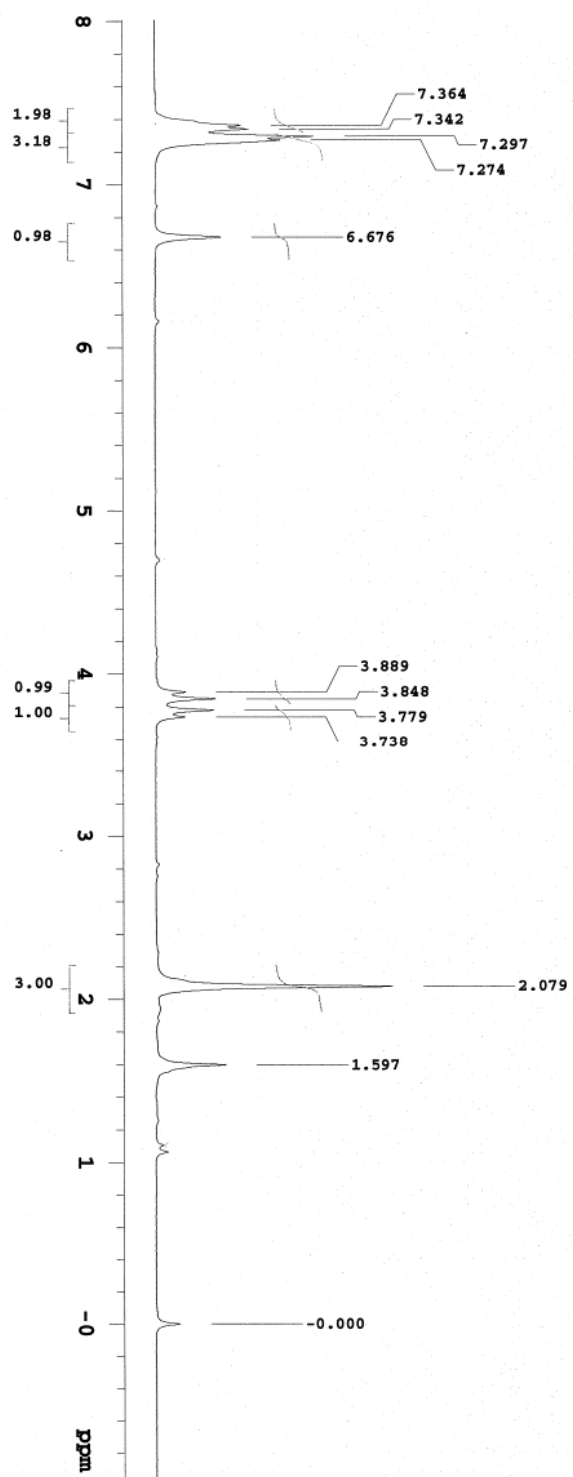

Copies of  $^{19}\text{F}$  NMR and  $^1\text{H}$  NMR

4-Phenoxy-1-(trifluoromethylthio)benzene (5a)

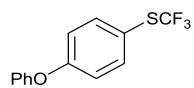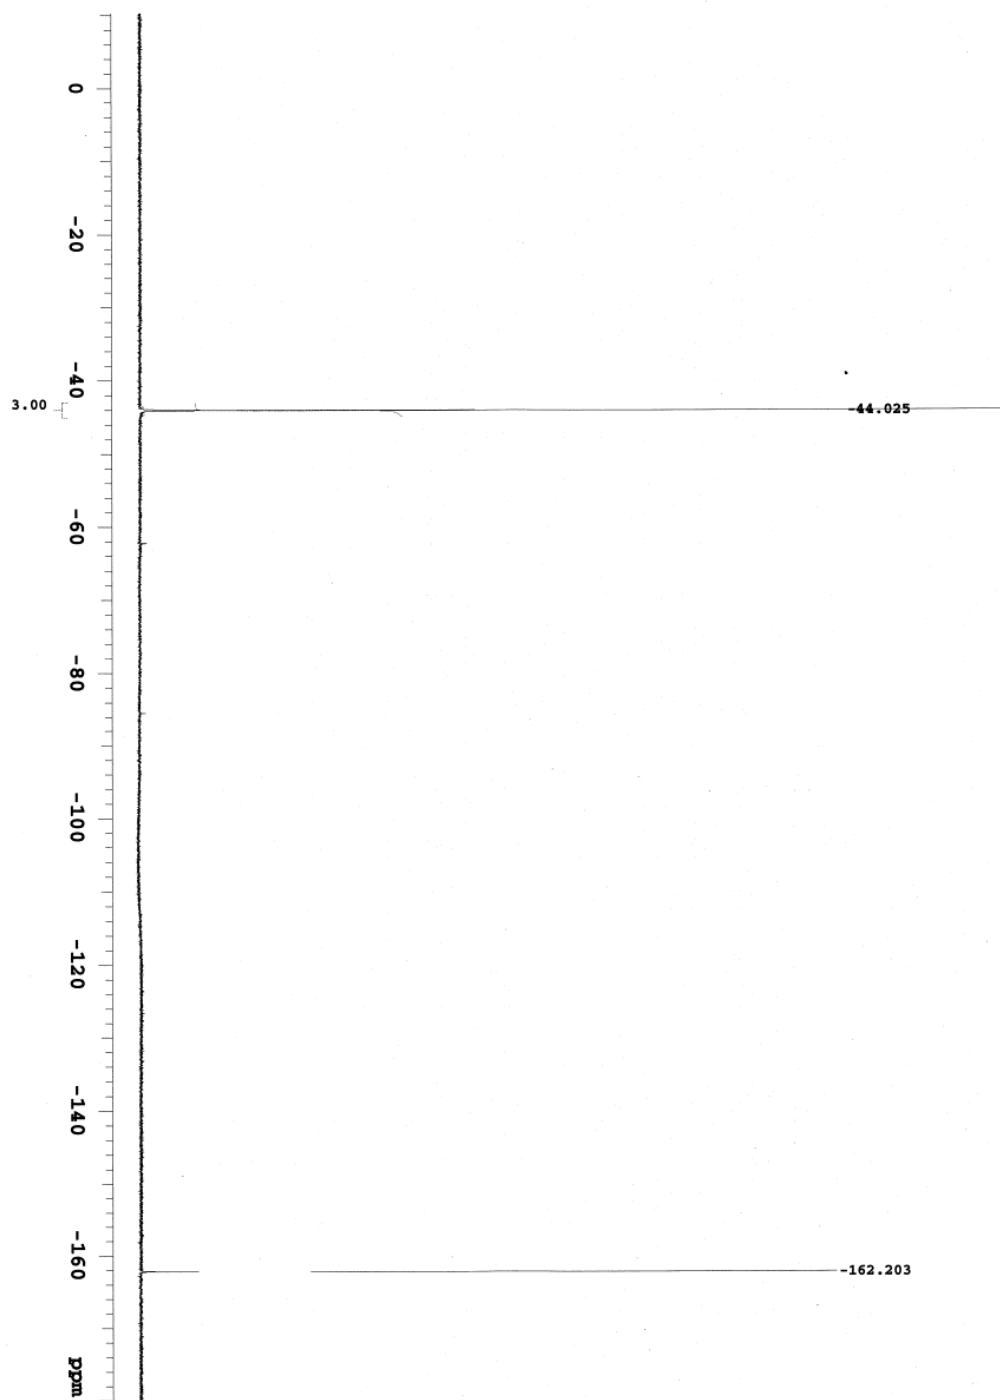

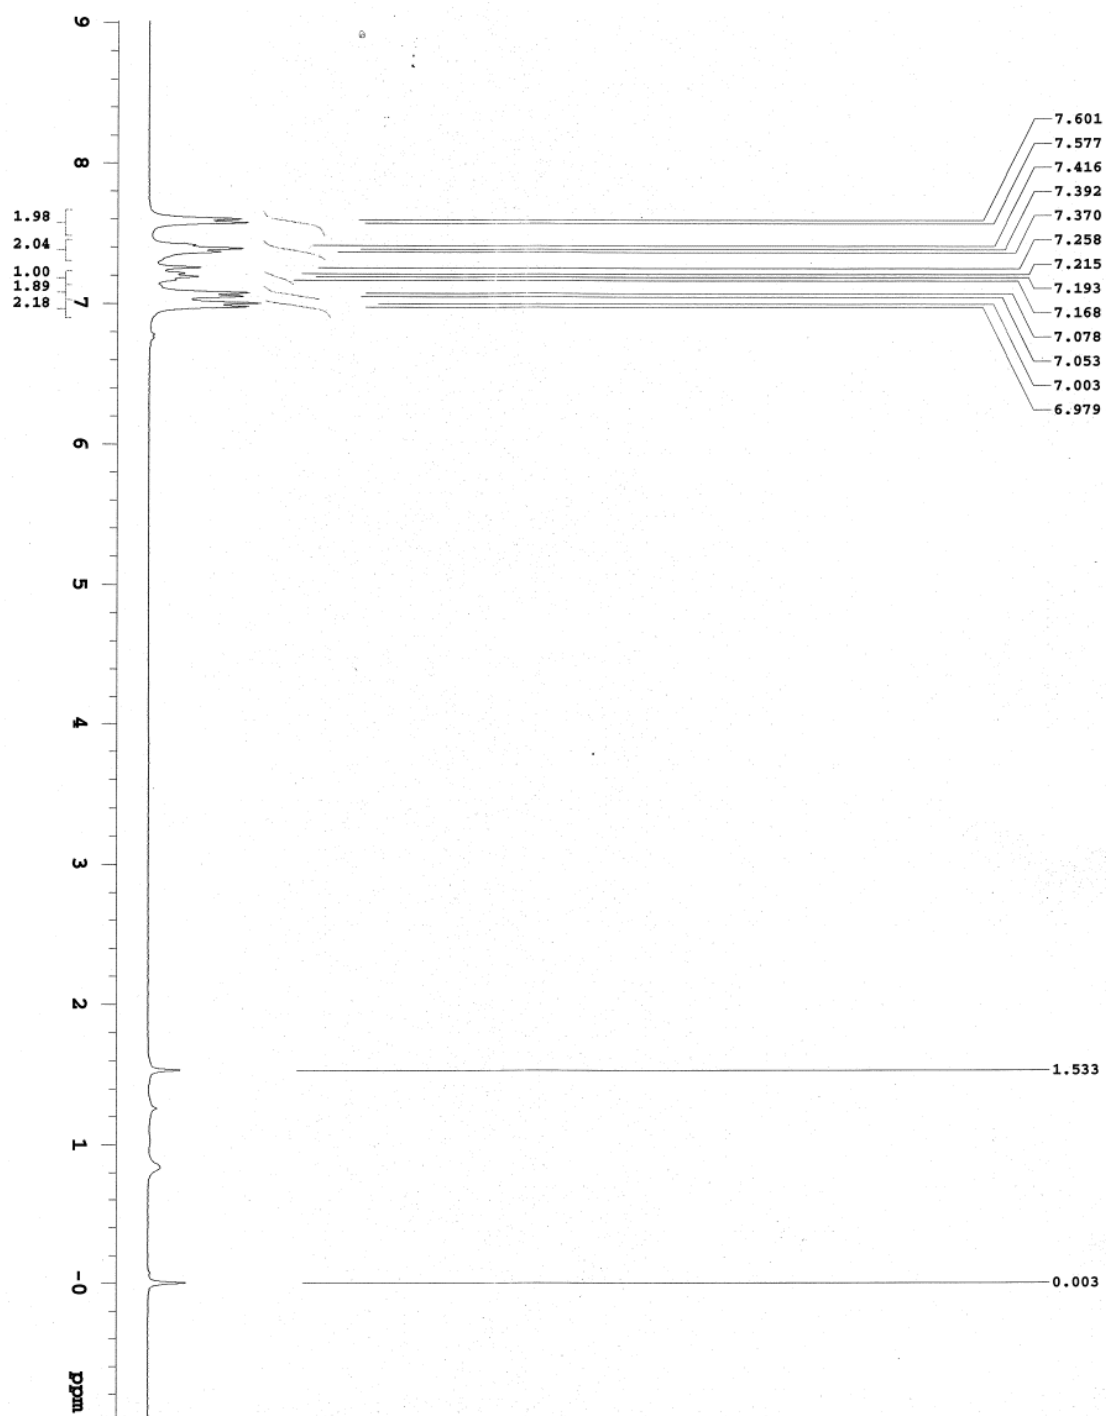

Copies of  $^{19}\text{F}$  NMR and  $^1\text{H}$  NMR

4-(Trifluoromethylthio)biphenyl (5b)

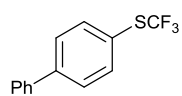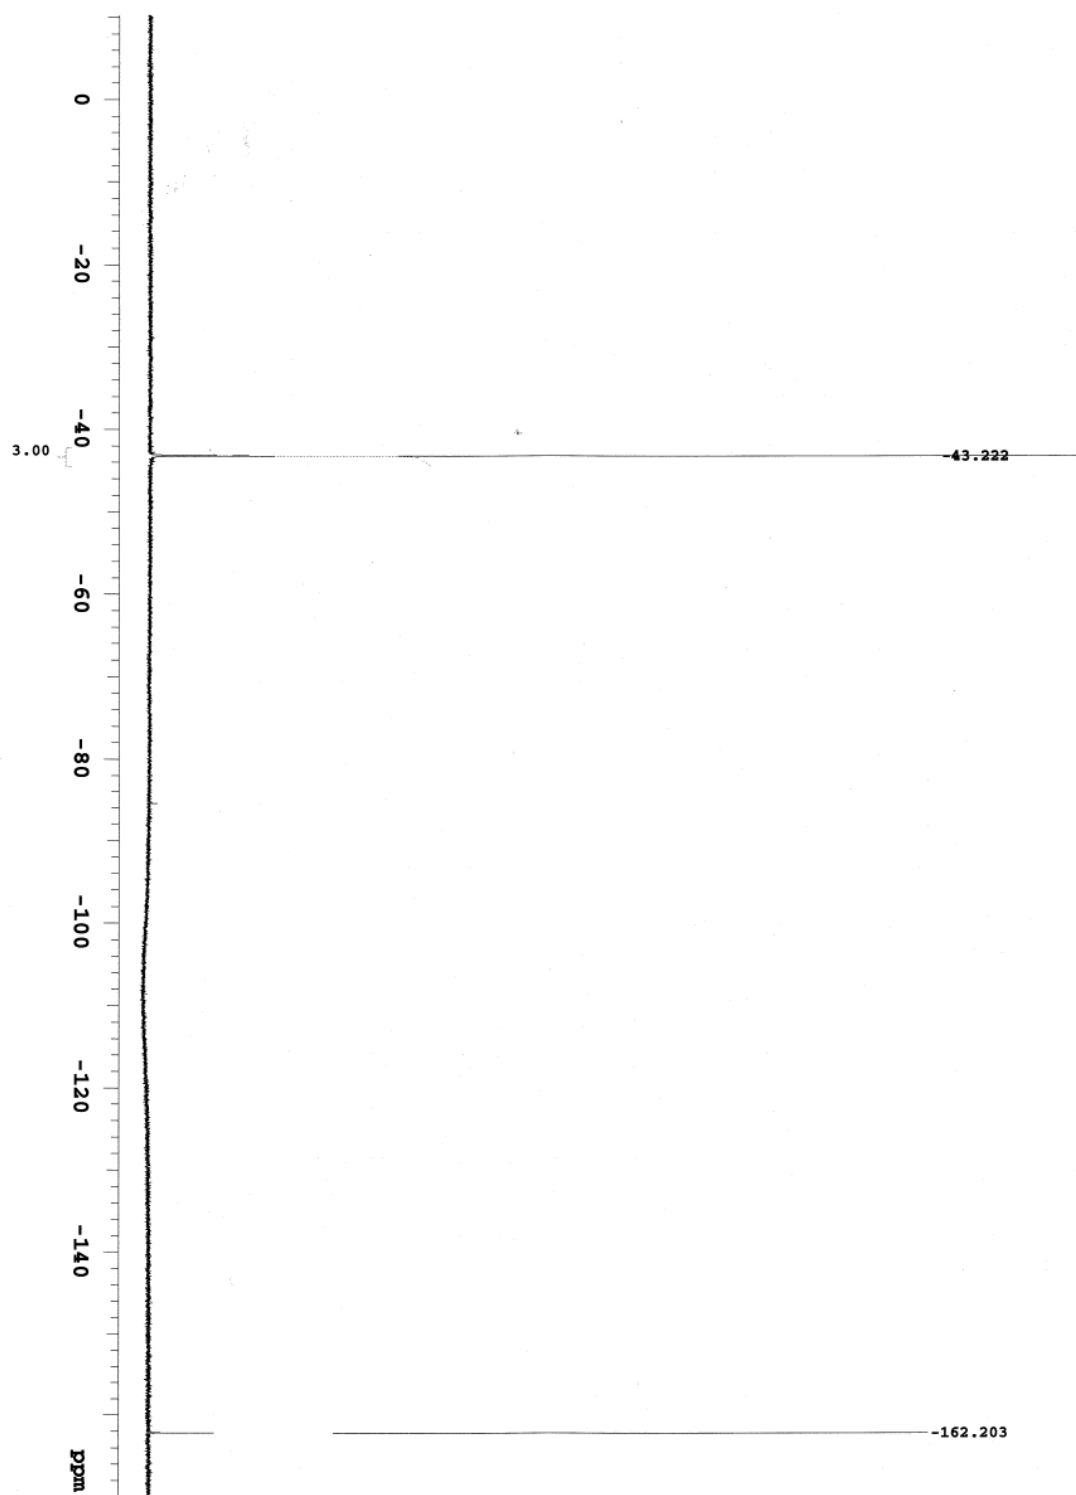

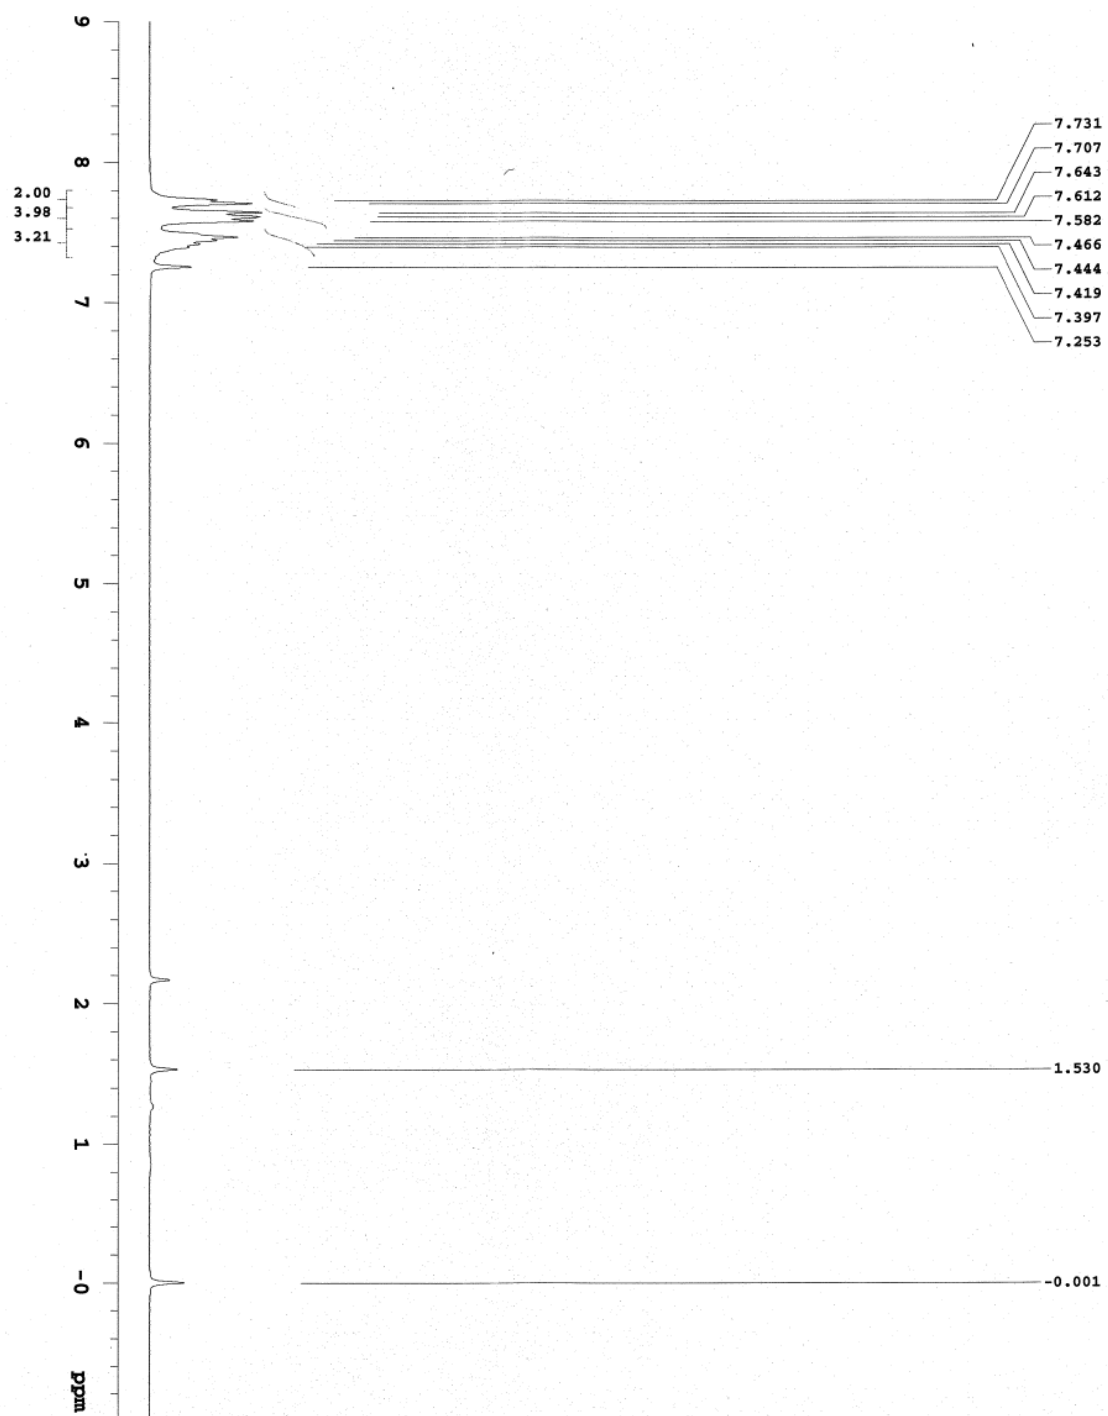

Copies of  $^{19}\text{F}$  NMR and  $^1\text{H}$  NMR

1-(Trifluoromethylthio)naphthalene (5c)

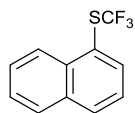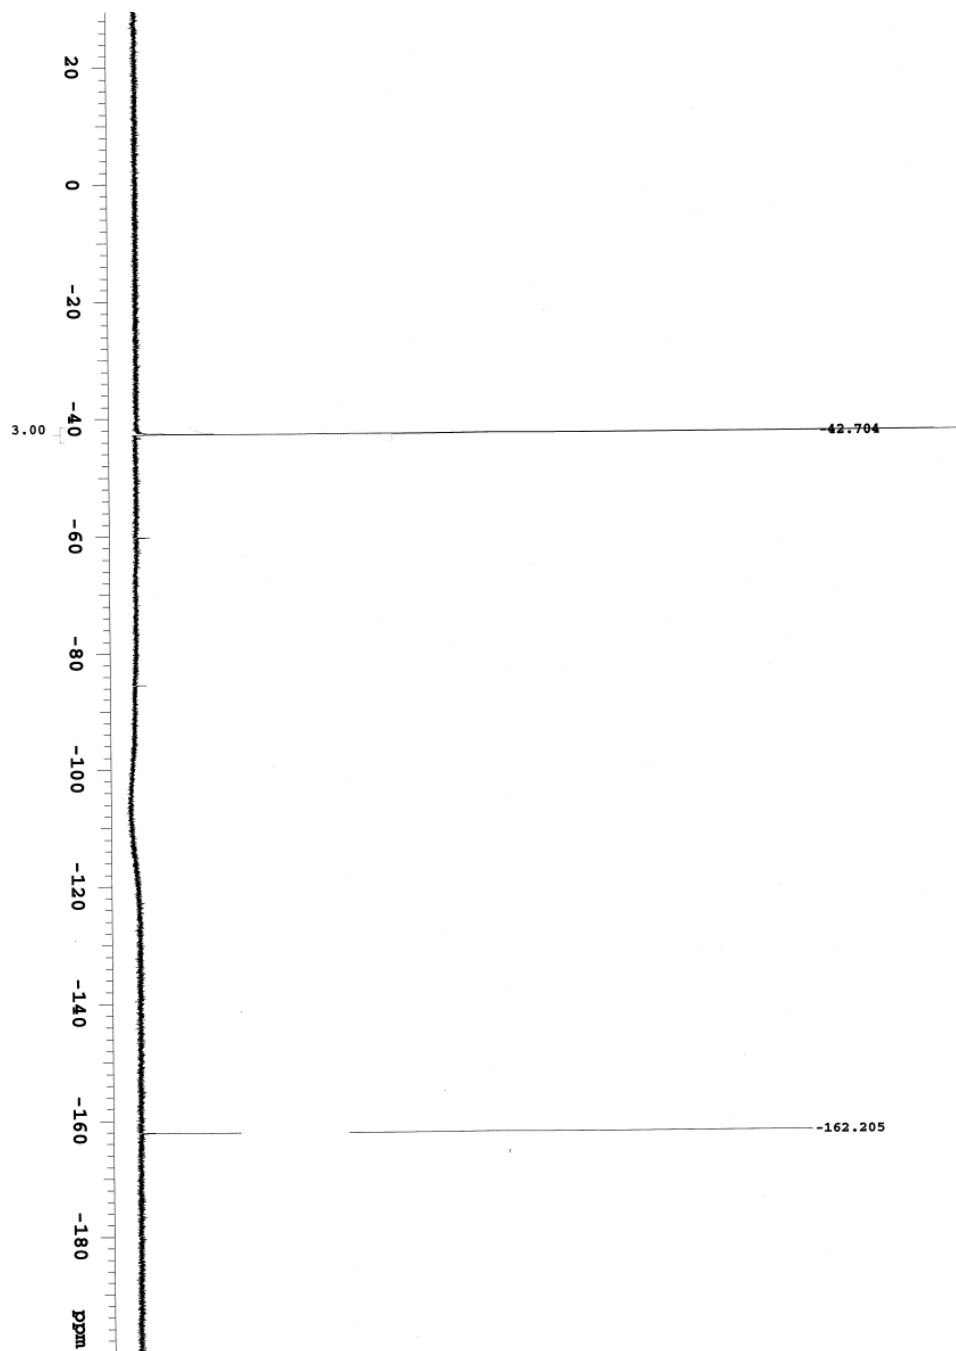



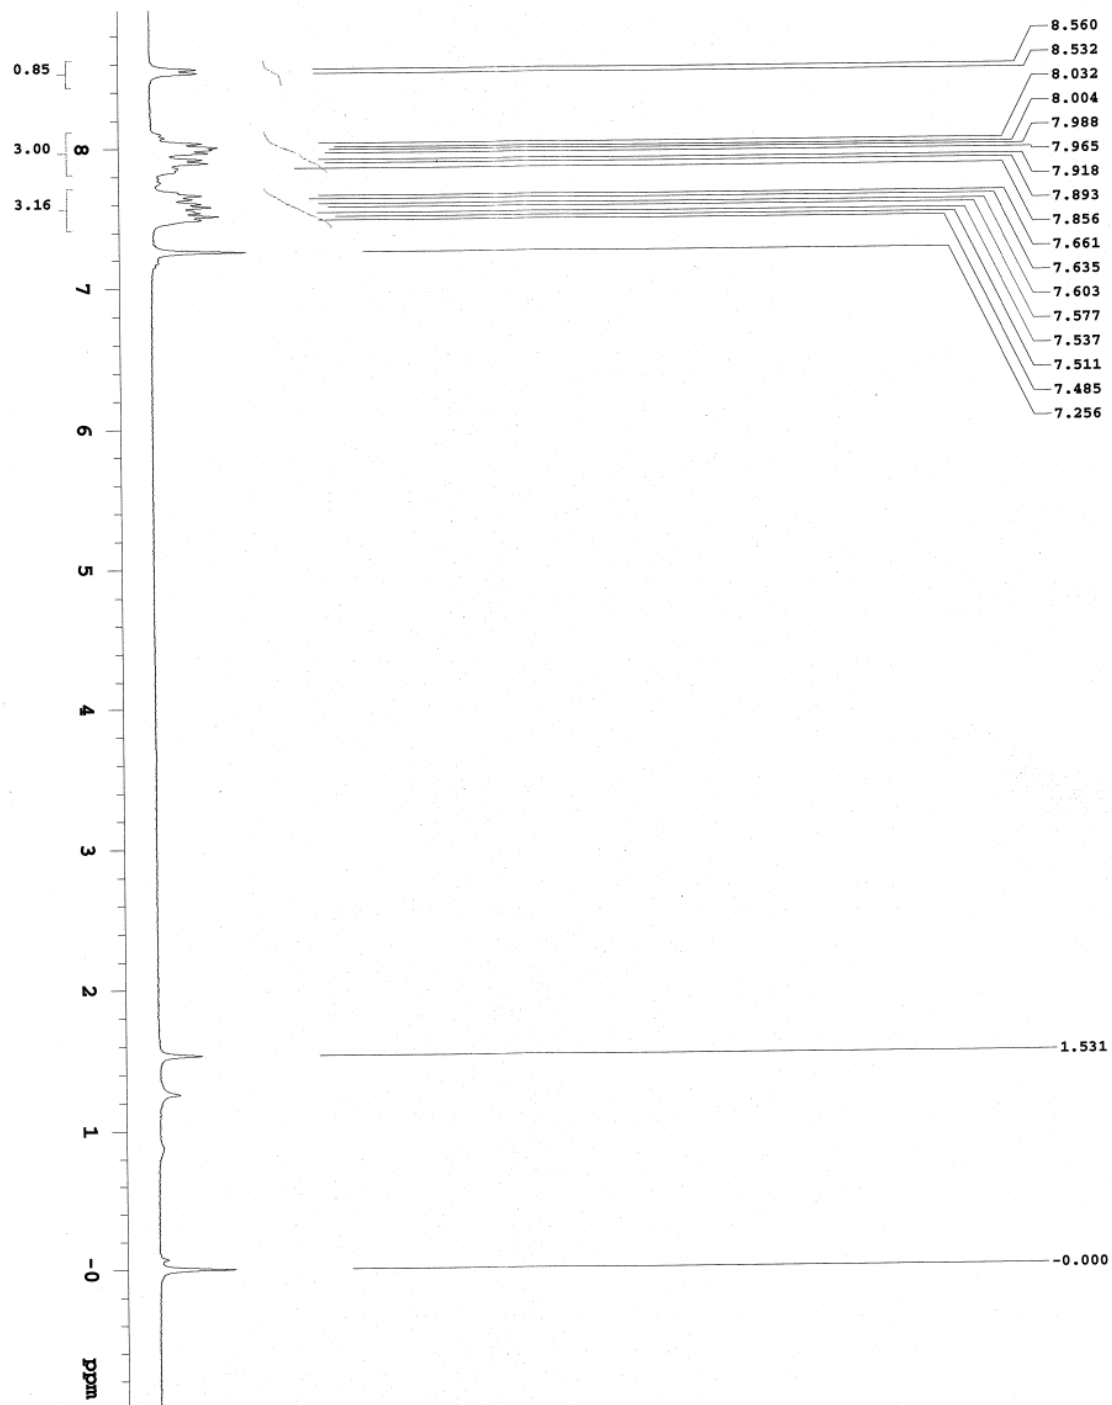

Copies of  $^{19}\text{F}$  NMR and  $^1\text{H}$  NMR

(6-Methoxynaphthalene-2-yl)(trifluoromethyl)sulfane (5d)

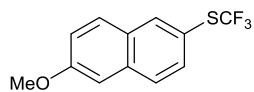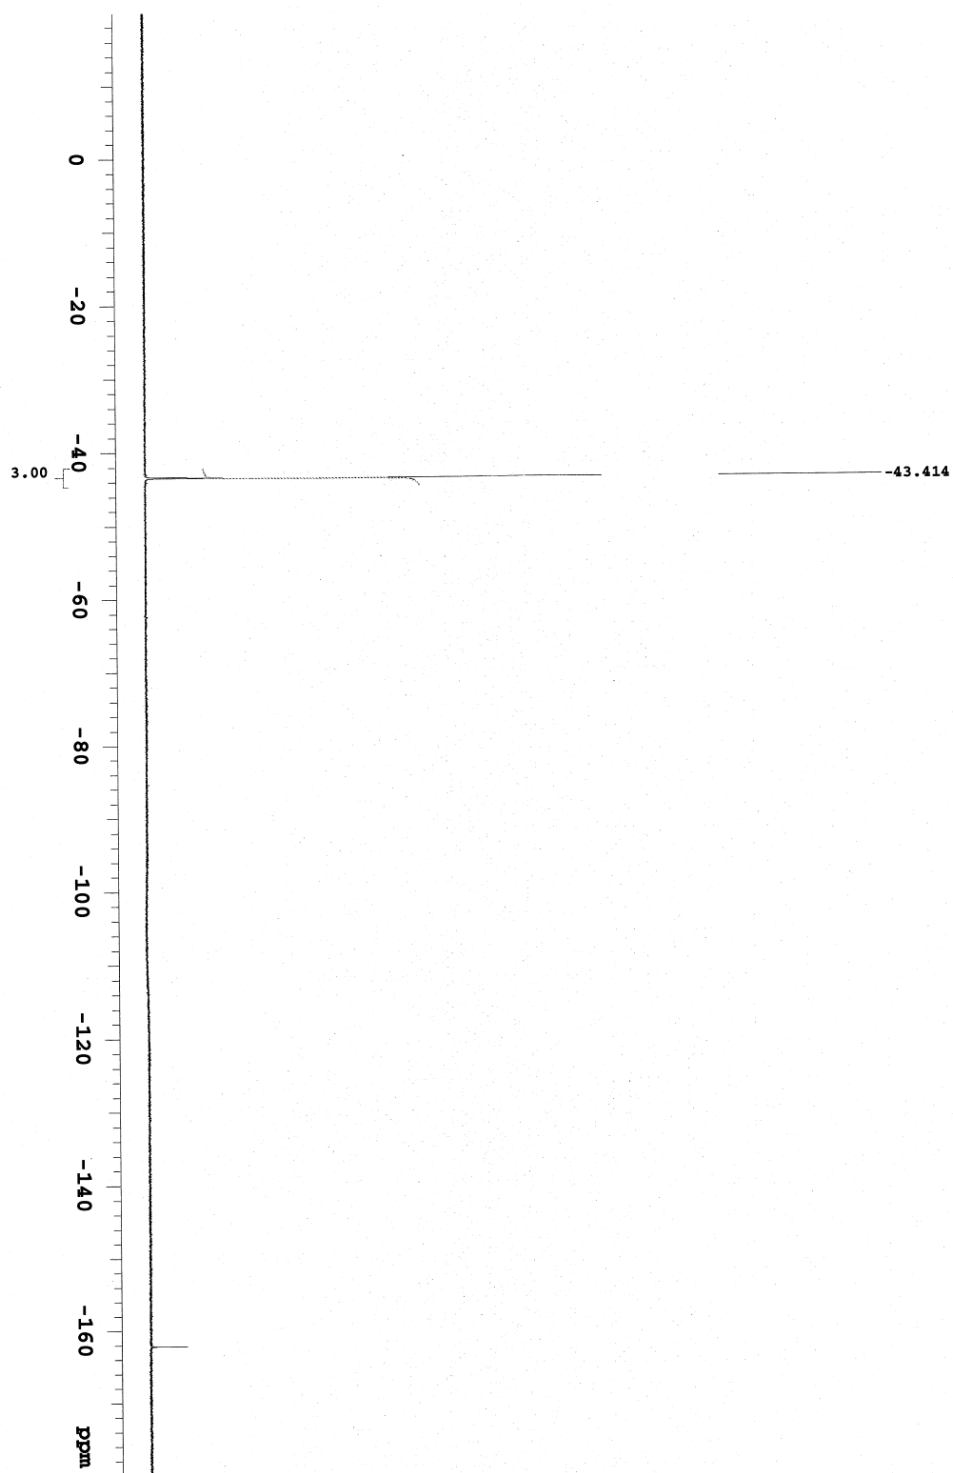

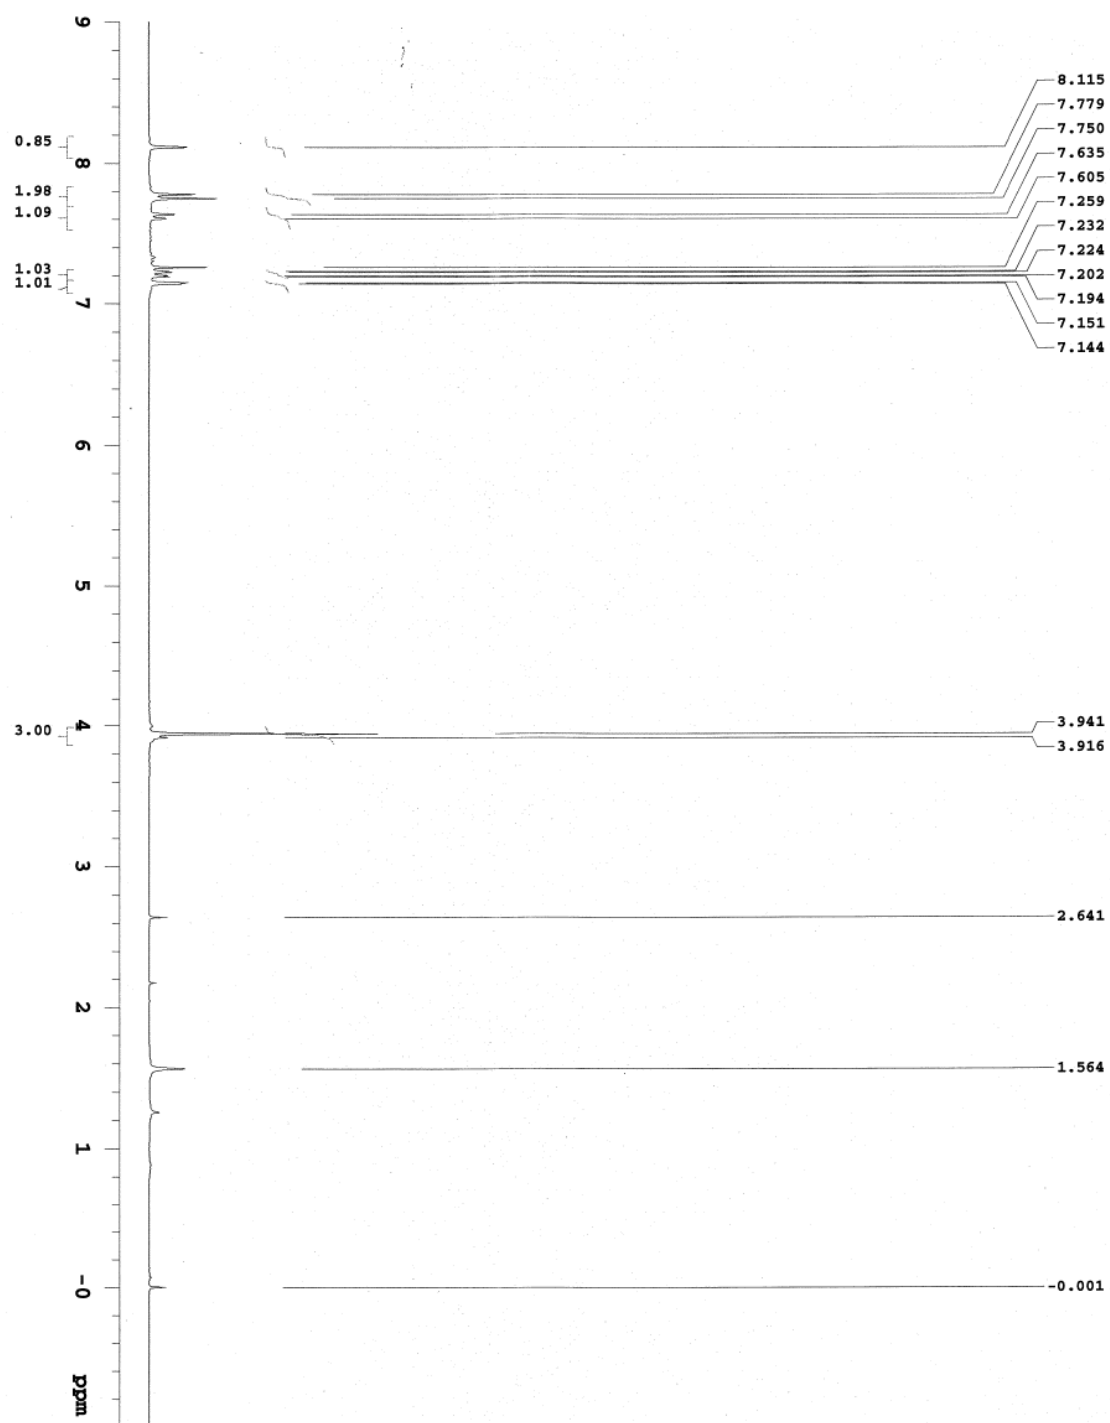

Copies of  $^{19}\text{F}$  NMR and  $^1\text{H}$  NMR

4-Nitro-1-(trifluoromethylthio)benzene (5e)

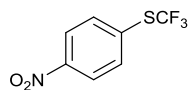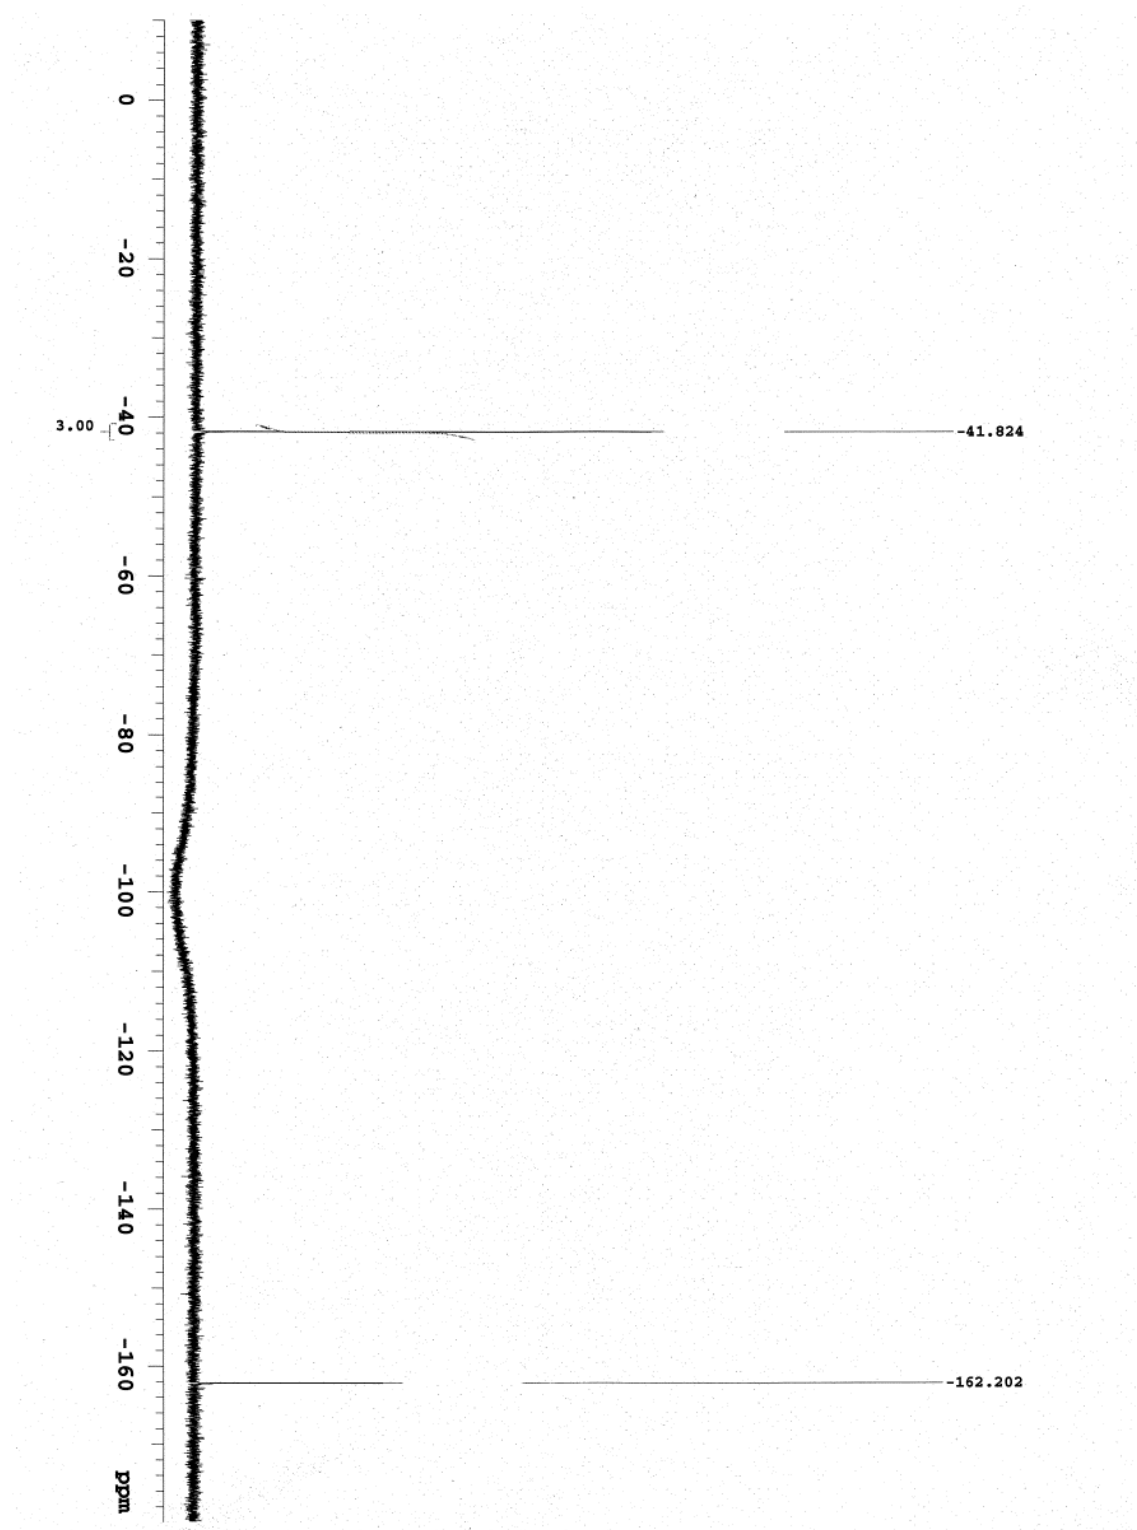

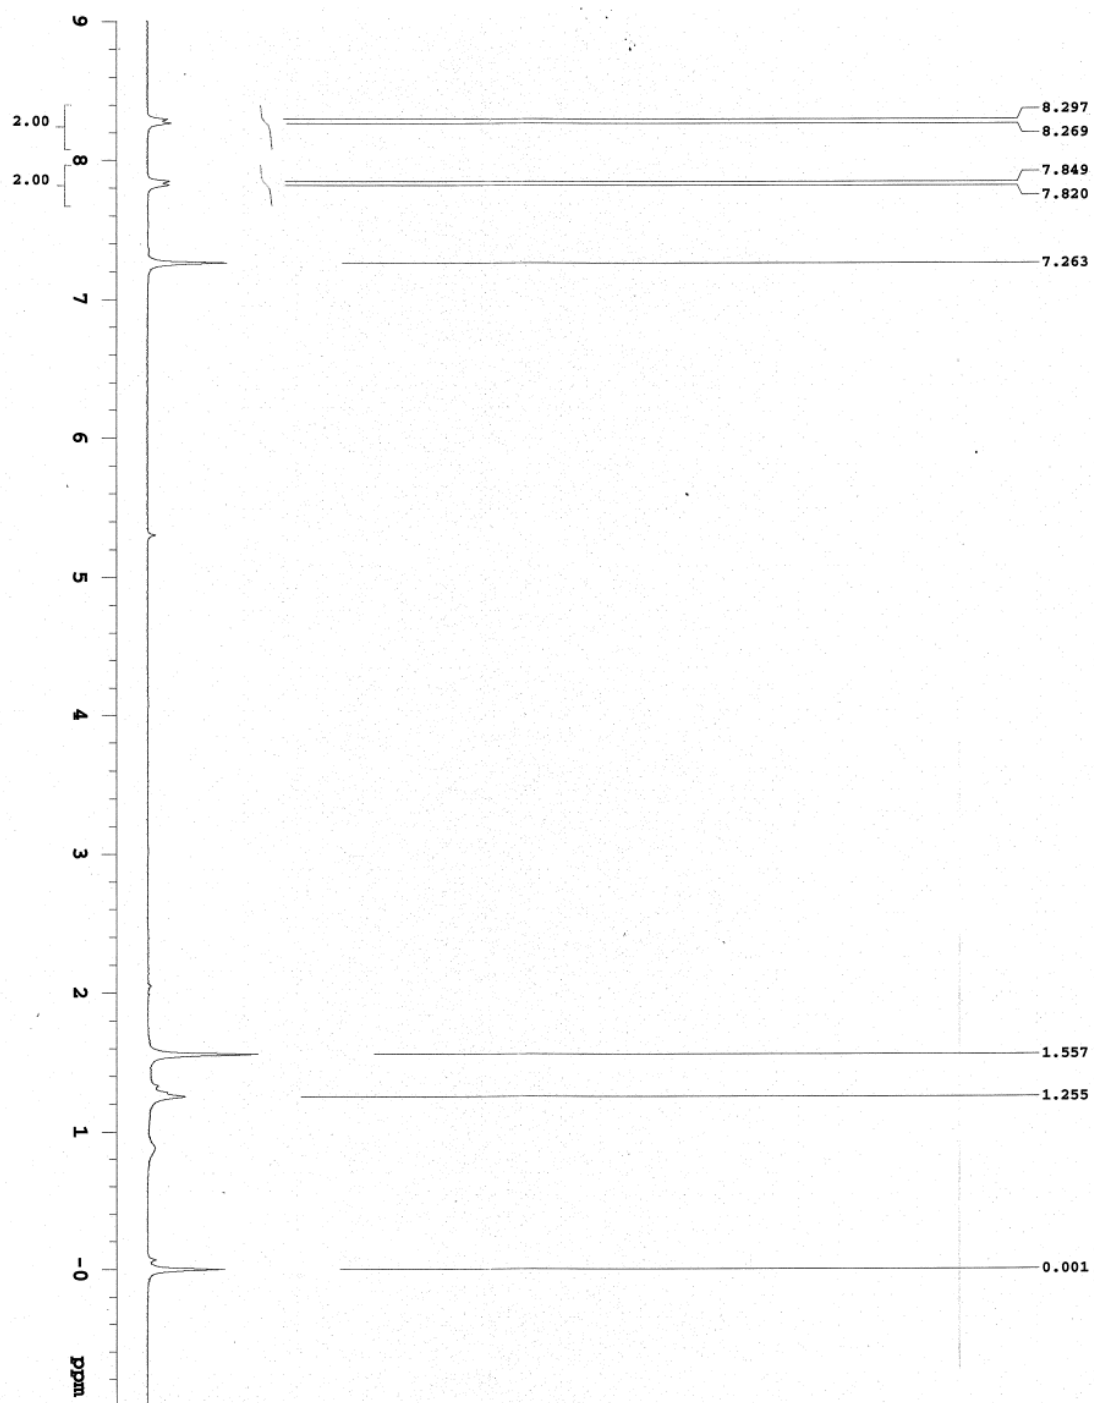

Copies of  $^{19}\text{F}$  NMR and  $^1\text{H}$  NMR

2-(Trifluoromethylthio)benzo[*b*]thiophene (5f)

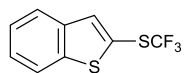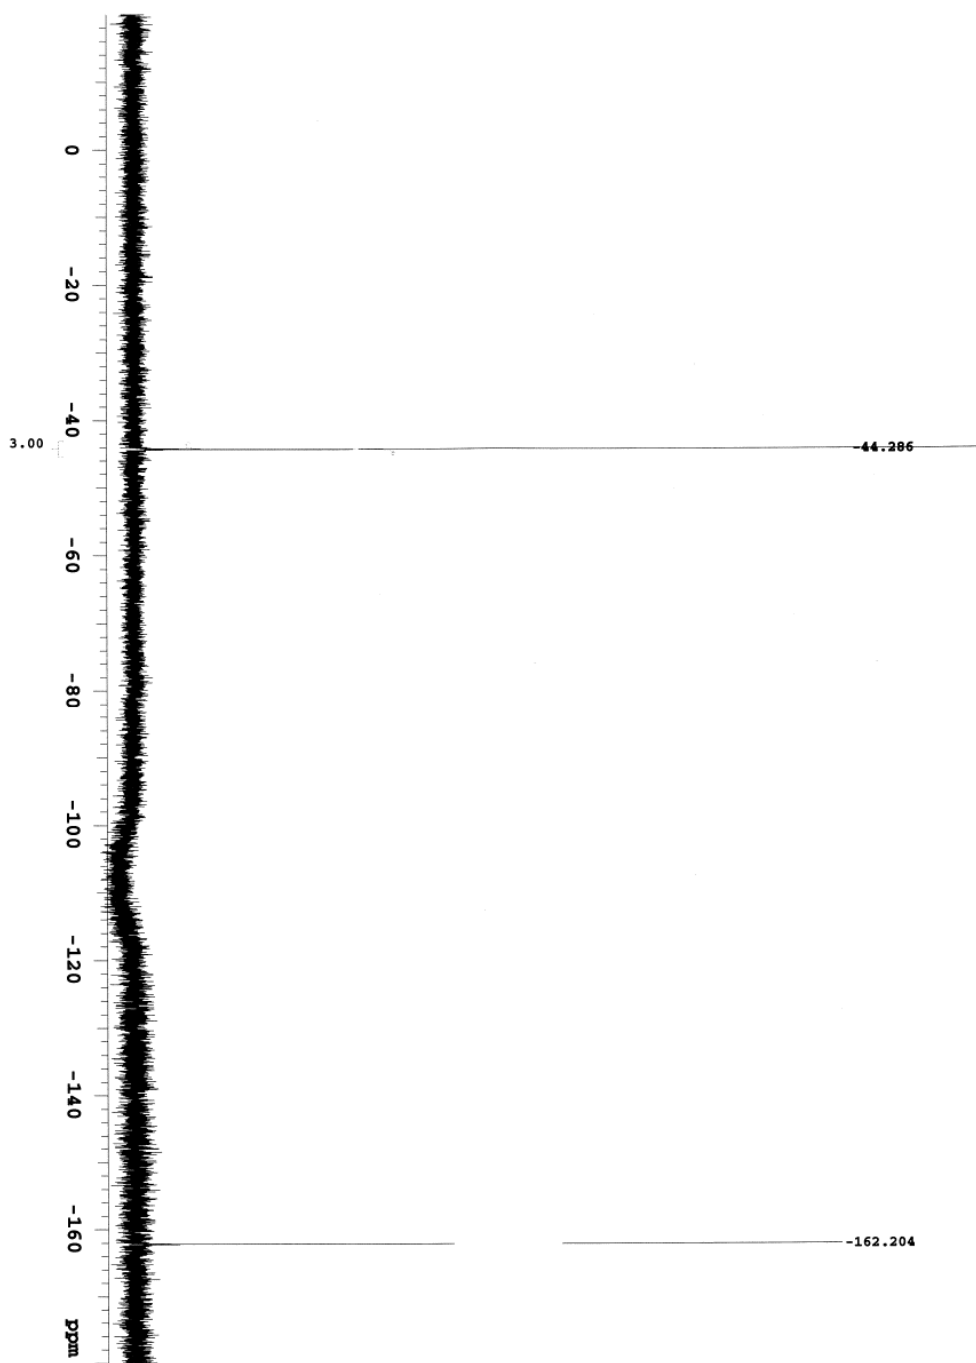

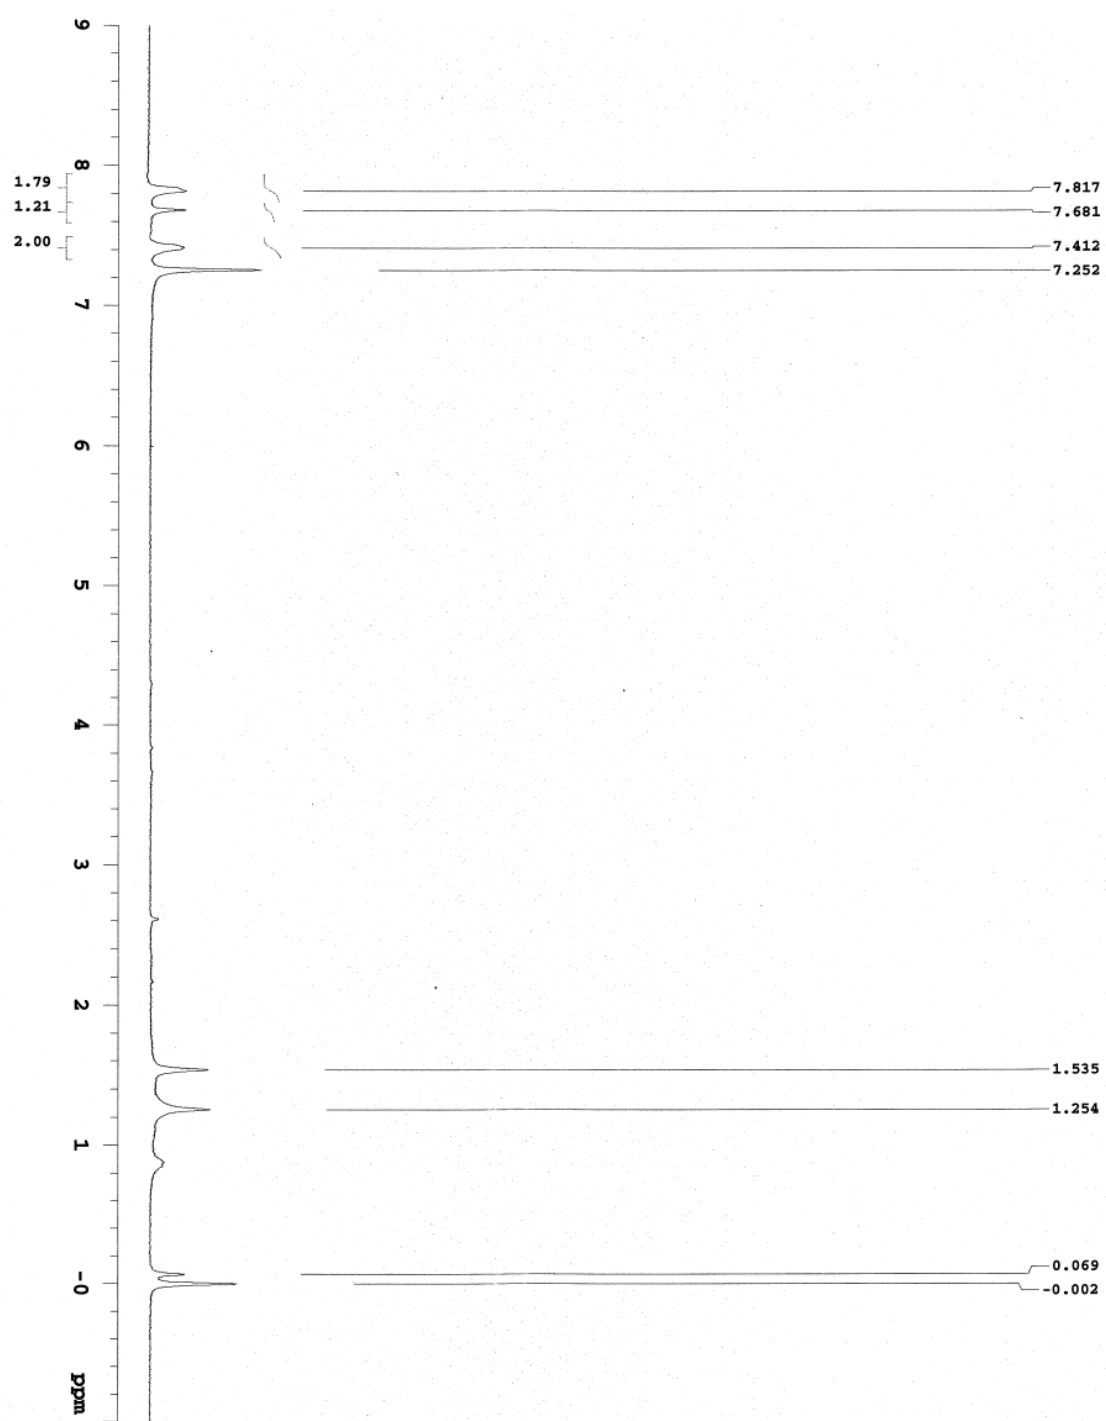

Copies of  $^{19}\text{F}$  NMR and  $^1\text{H}$  NMR

3-(Trifluoromethylthio)benzo[*b*]furan (5g)

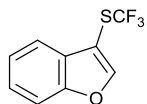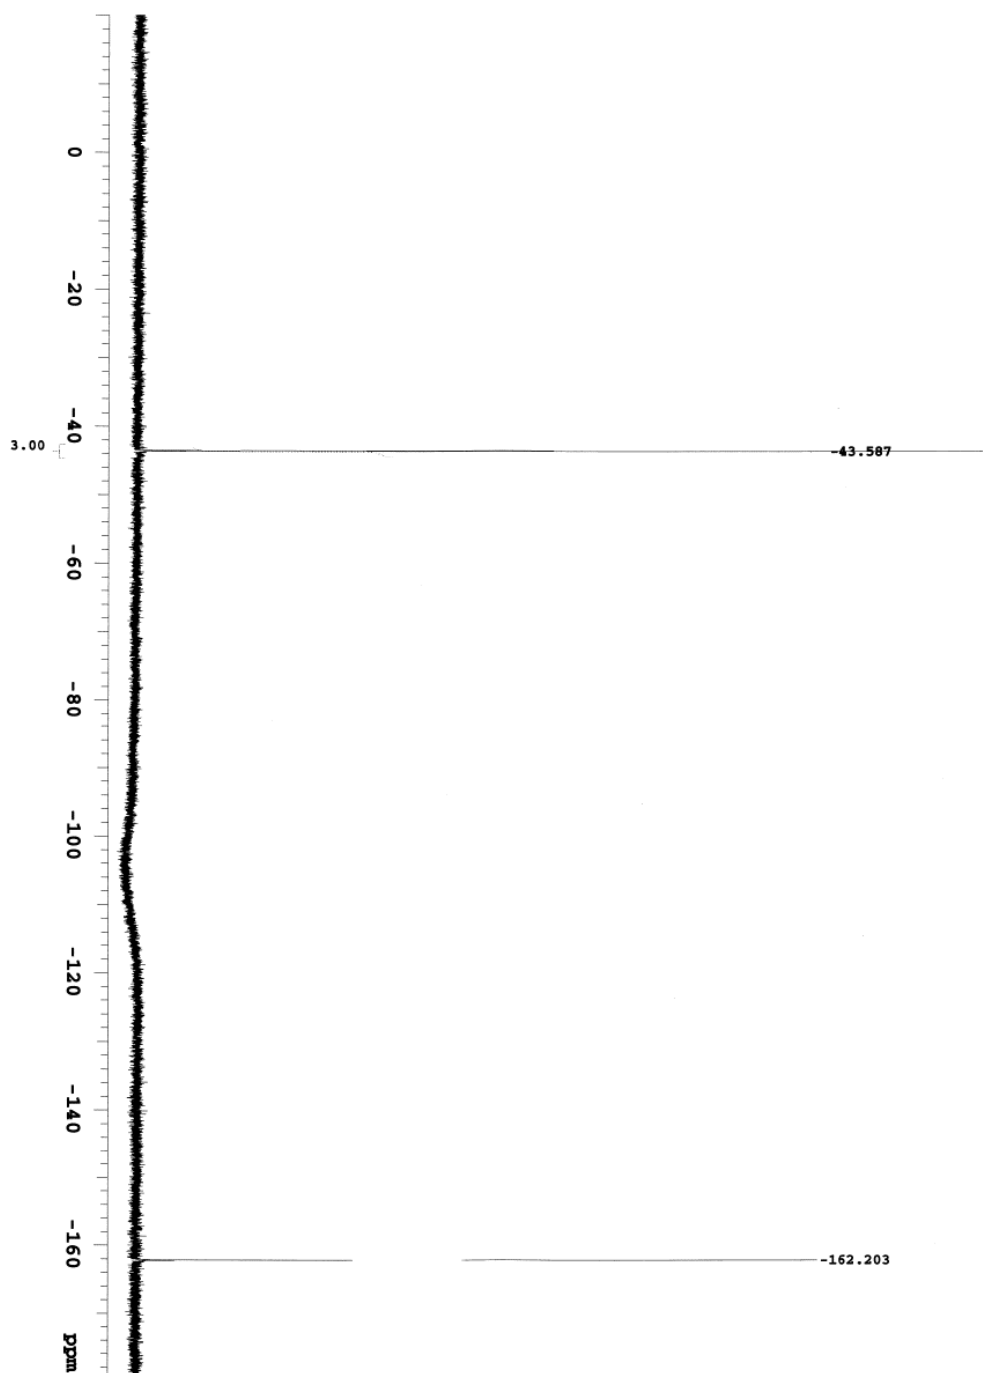



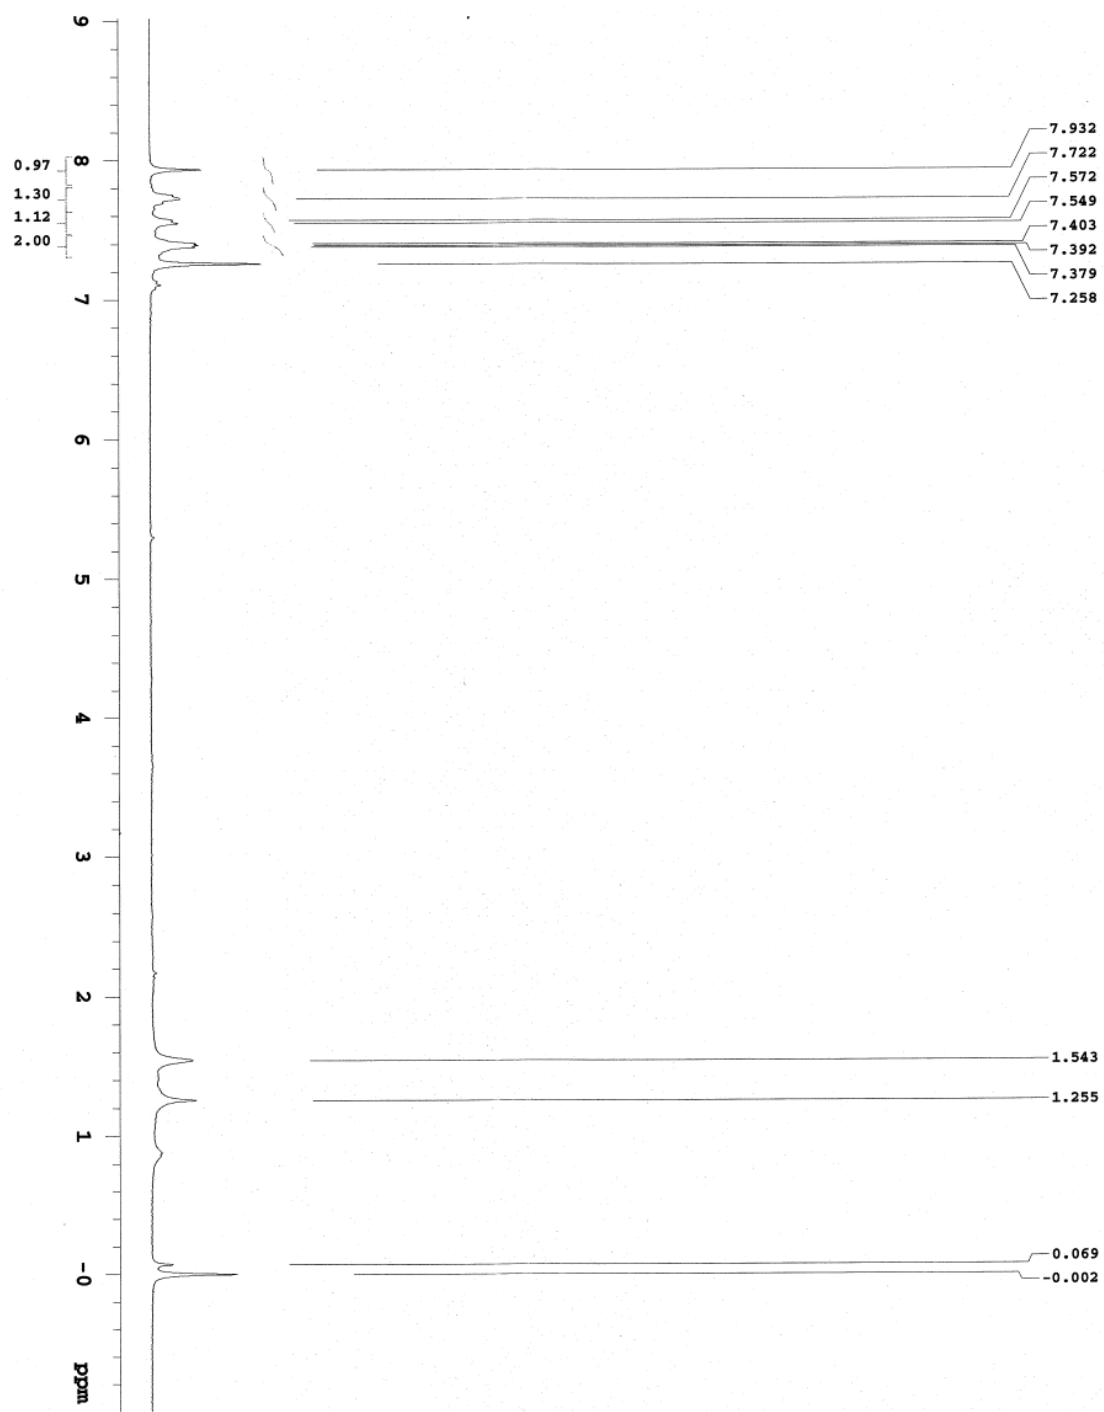

Copies of  $^{19}\text{F}$  NMR and  $^1\text{H}$  NMR

(*E*)-(4-phenylstyryl)(trifluoromethyl)sulfane (5h)

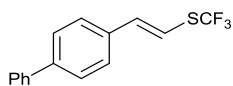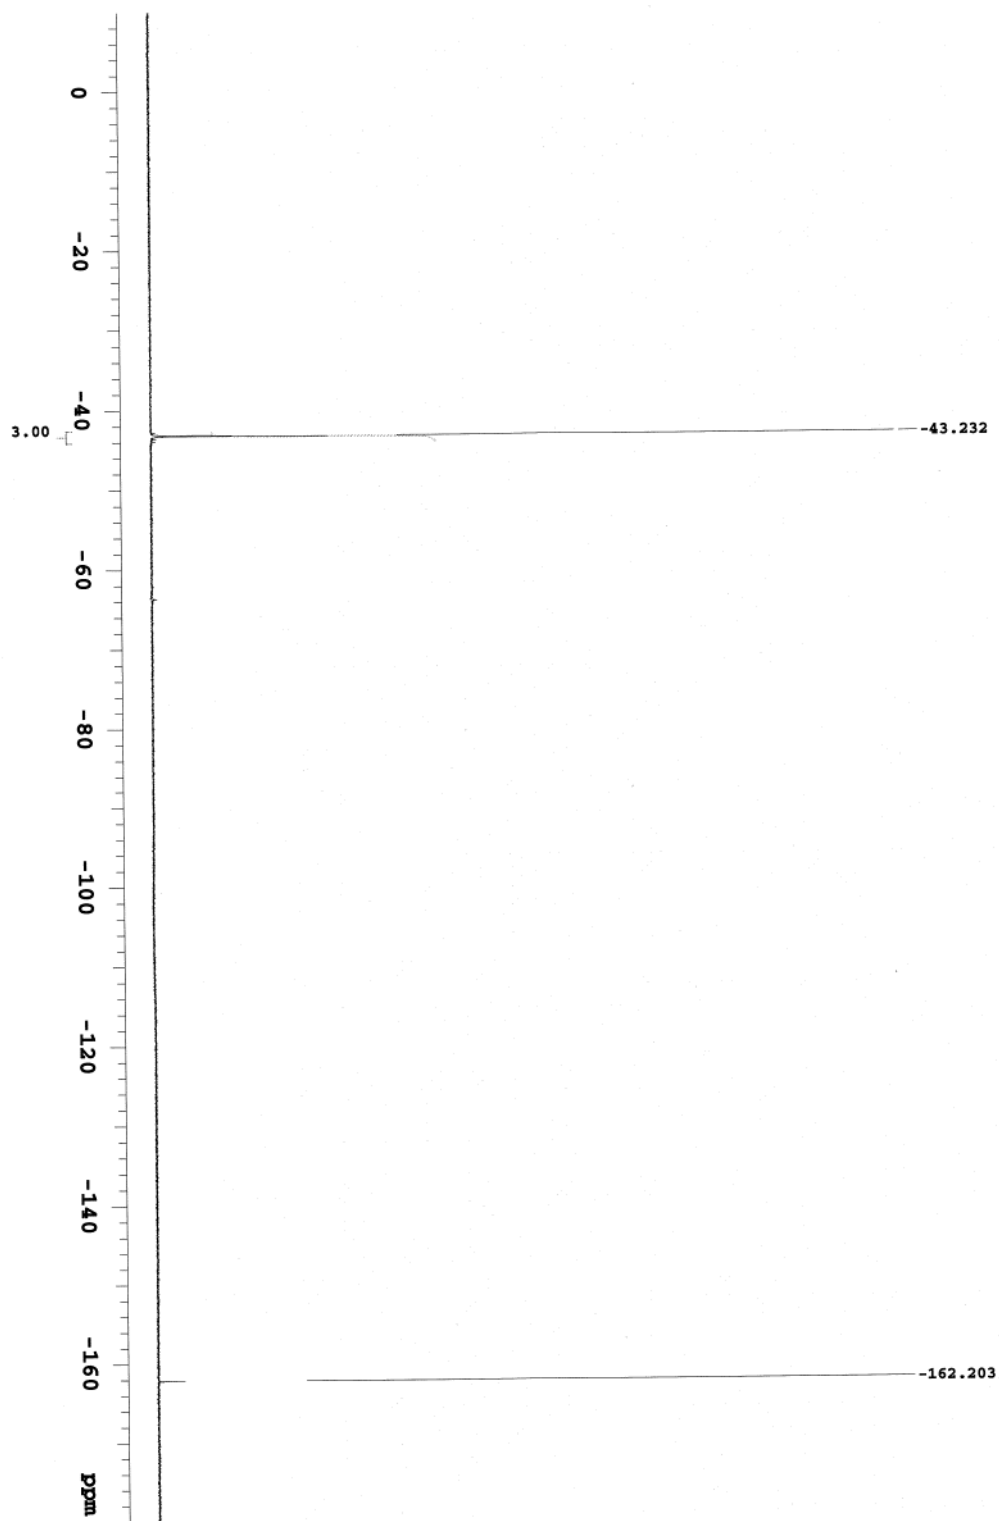

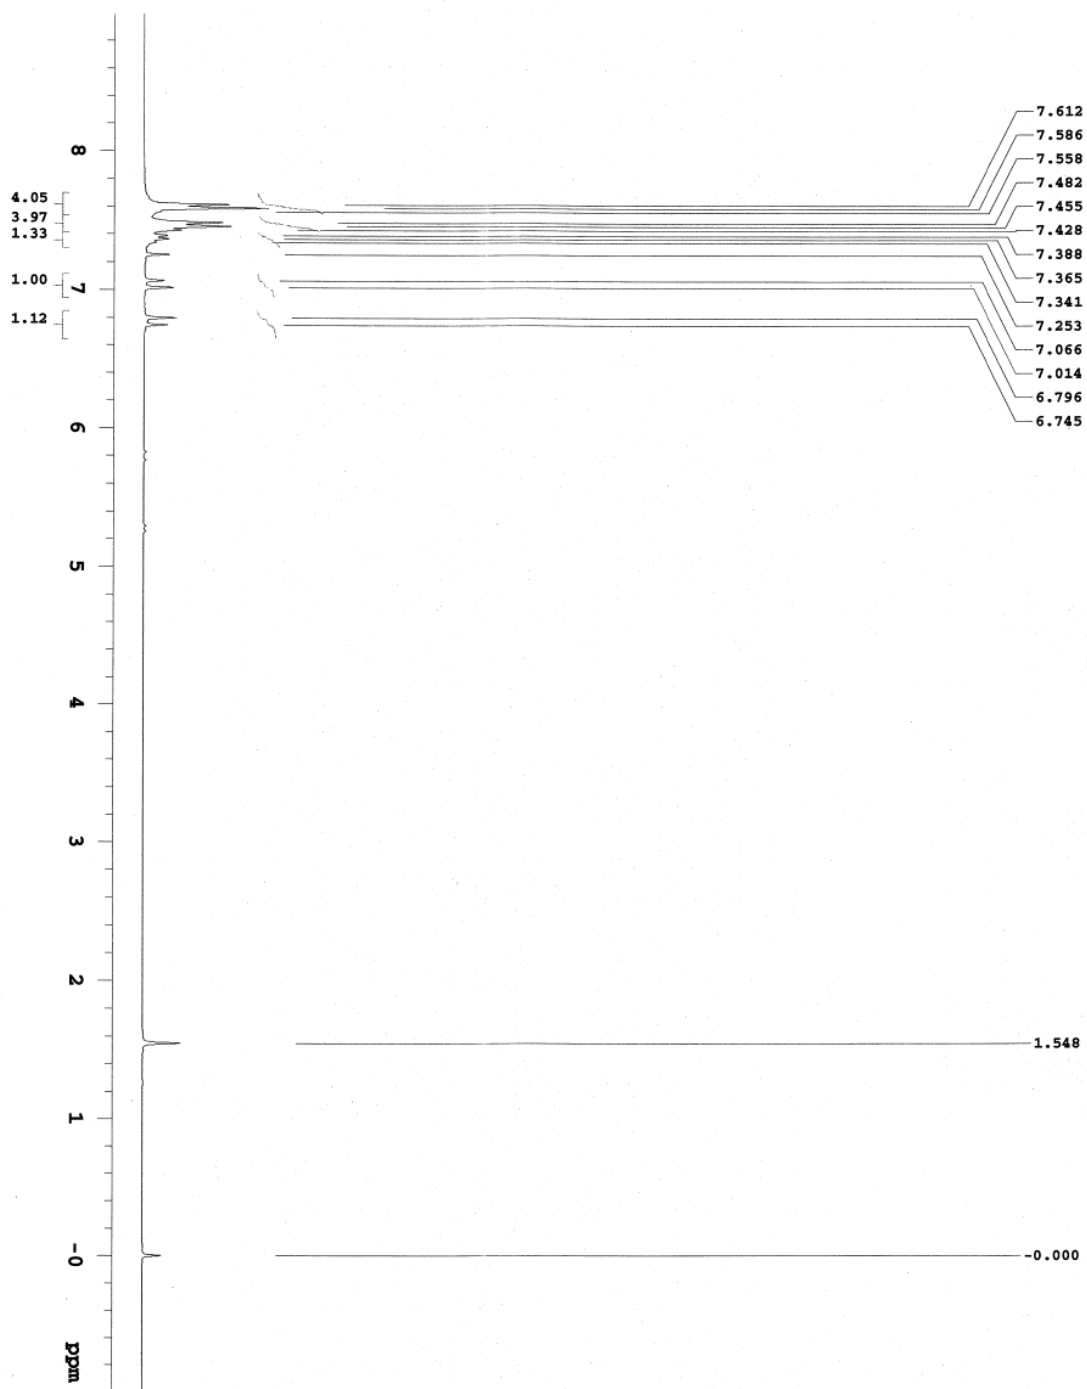

Copies of  $^{19}\text{F}$  NMR and  $^1\text{H}$  NMR

(*E*)-(4-methoxystyryl)(trifluoromethyl)sulfane (5i)

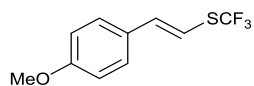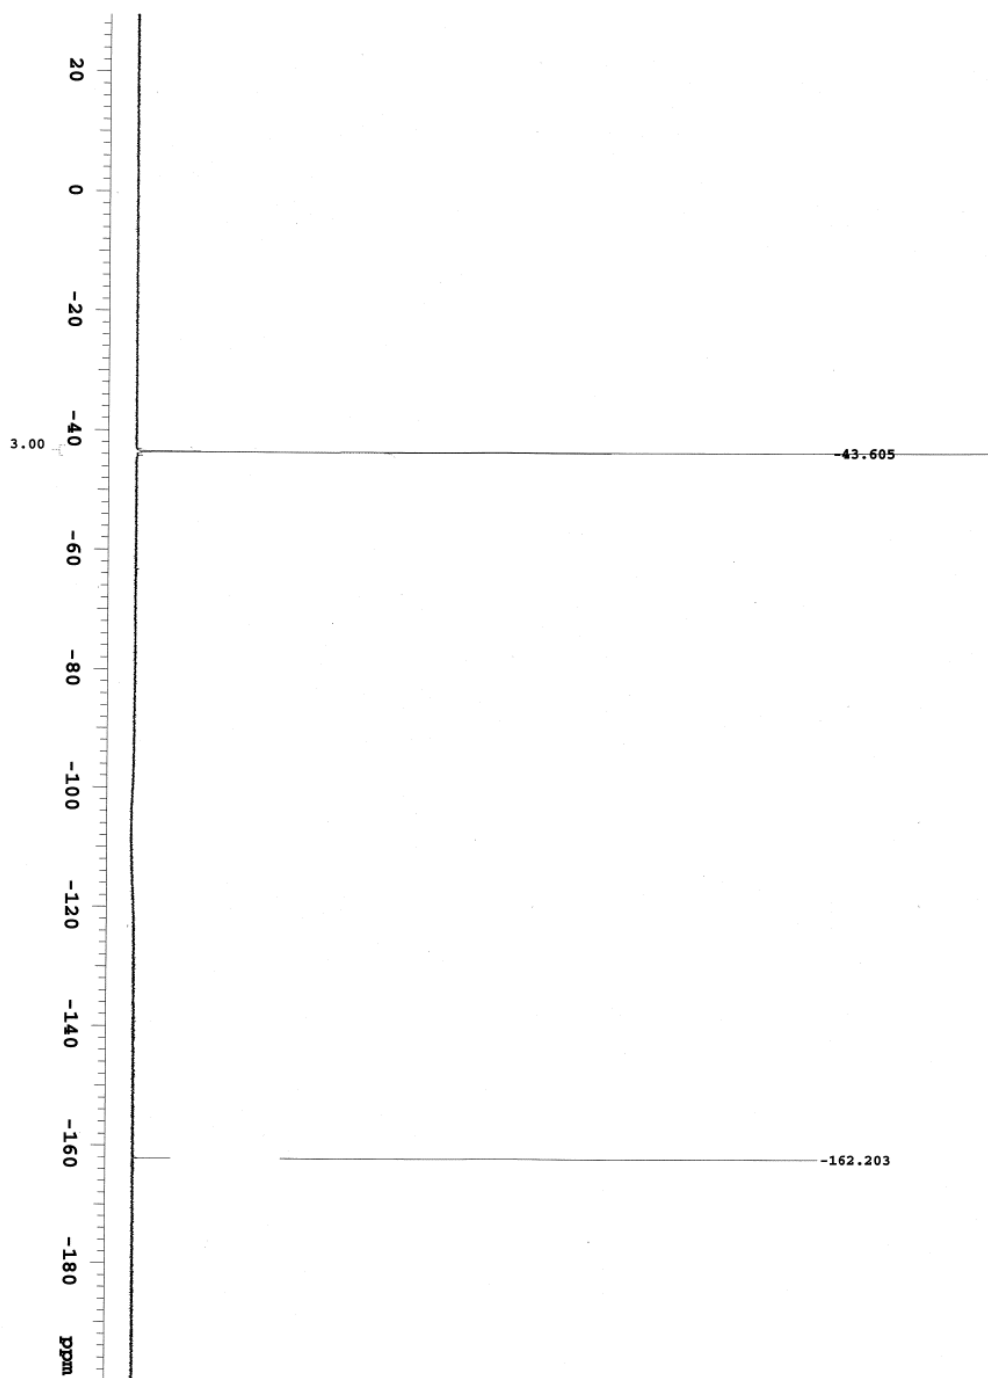

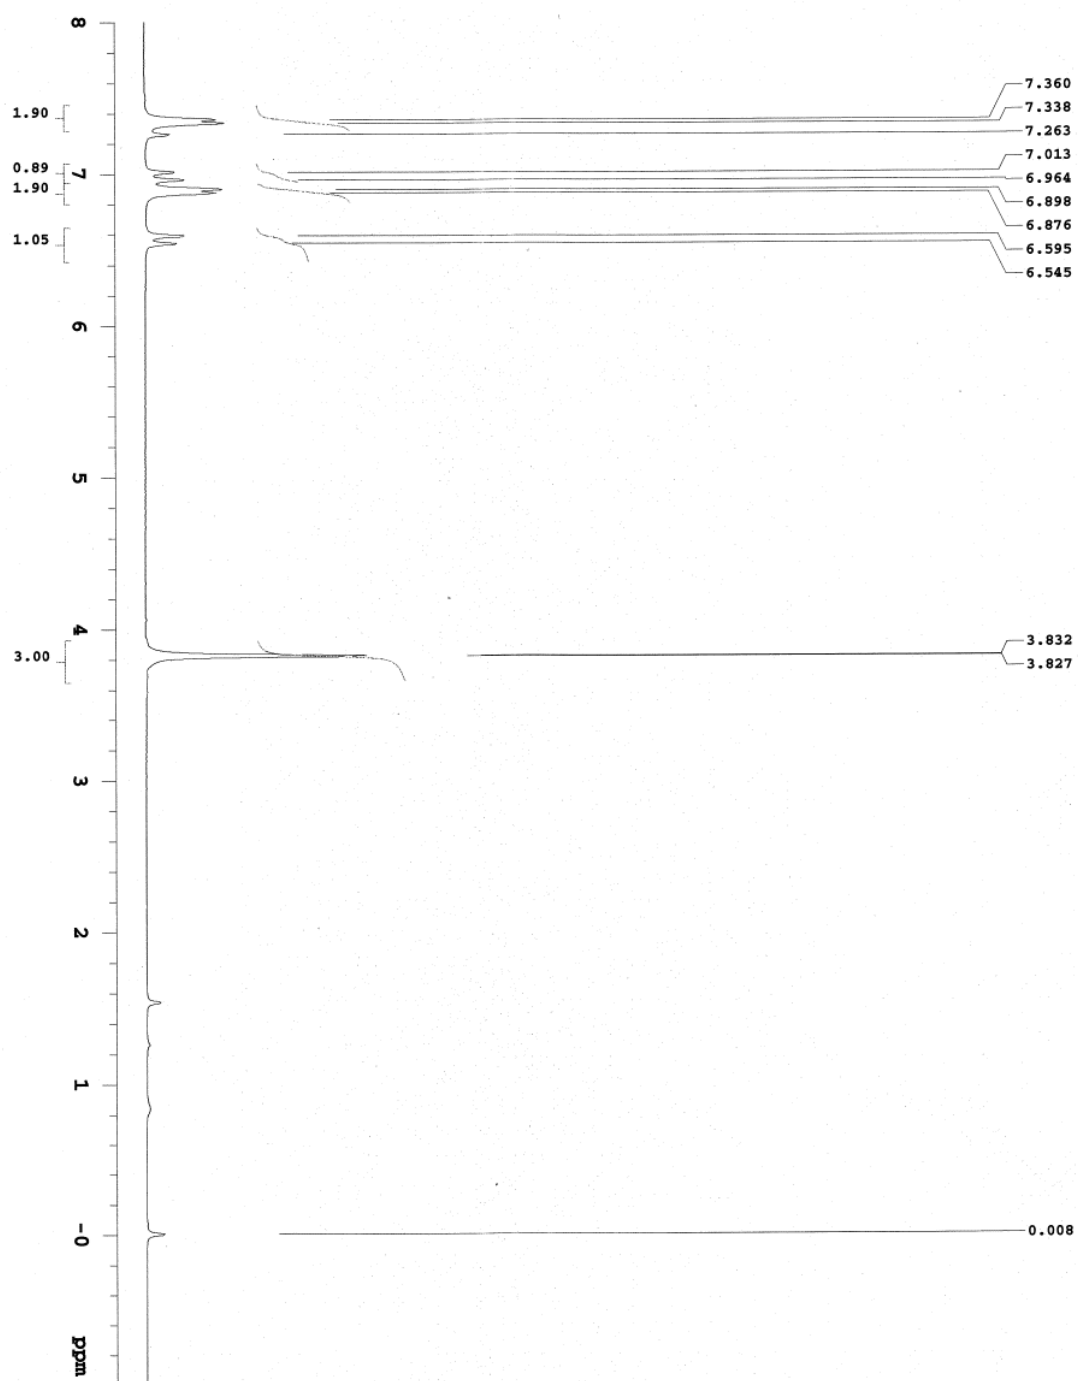

Supplement: c5dt02214b1.pdf [file c5dt02214b1.pdf]
